# Supplementary material
Source: PubMed Central journal article supplement (PMC7855901)
Supplement: NIHMS1652782-supplement-Statistical_Code_and_Supplementary_Analyses.pdf [file NIHMS1652782-supplement-Statistical_Code_and_Supplementary_Analyses.pdf]

# Socioeconomic Status and Child Psychopathology: A Meta-Analysis of Population-Based Studies. Appendix B: Analysis Code

## Abstract

This document provides supplemental text to the main manuscript. It presents our statistical code, formulas, and background information necessary for transparency and replication, including supplemental analyses and figures.

## Contents

|          |                                                       |           |
|----------|-------------------------------------------------------|-----------|
| <b>1</b> | <b>Analysis Code and Output</b>                       | <b>4</b>  |
| <b>2</b> | <b>Session Info</b>                                   | <b>4</b>  |
| <b>3</b> | <b>Variables</b>                                      | <b>4</b>  |
| <b>4</b> | <b>Sources</b>                                        | <b>6</b>  |
| <b>5</b> | <b>Sample Description Generation</b>                  | <b>12</b> |
| <b>6</b> | <b>Effect Size Calculations</b>                       | <b>13</b> |
| 6.1      | OR calculation . . . . .                              | 13        |
| 6.1.1    | 2x2 tables . . . . .                                  | 13        |
| 6.1.2    | Raw OR . . . . .                                      | 15        |
| 6.2      | g calculation . . . . .                               | 18        |
| 6.2.1    | Mean and standard deviation . . . . .                 | 18        |
| 6.2.2    | F test . . . . .                                      | 20        |
| 6.2.3    | Continuous SES, Dichotomous Psychopathology . . . . . | 21        |
| 6.3      | Z transformed r (Zr) calculation . . . . .            | 23        |
| 6.3.1    | Regression coefficient (beta) . . . . .               | 23        |
| 6.3.2    | r . . . . .                                           | 24        |
| 6.4      | Data check . . . . .                                  | 25        |
| <b>7</b> | <b>Effect Parameter Conversion</b>                    | <b>29</b> |
| 7.1      | Formulas . . . . .                                    | 29        |
| 7.1.1    | Z to g . . . . .                                      | 29        |
| 7.1.2    | OR to g . . . . .                                     | 30        |
| 7.1.3    | g to OR . . . . .                                     | 31        |

|           |                                               |           |
|-----------|-----------------------------------------------|-----------|
| 7.1.4     | z to OR                                       | 31        |
| 7.1.5     | g to z                                        | 32        |
| 7.1.6     | OR to z                                       | 32        |
| 7.2       | Data conversion                               | 33        |
| <b>8</b>  | <b>Reverse Coding</b>                         | <b>34</b> |
| <b>9</b>  | <b>Covariance Estimation</b>                  | <b>35</b> |
| 9.1       | Covariance calculations                       | 36        |
| 9.2       | Estimate of covariance based on FF at year 9. | 37        |
| <b>10</b> | <b>Omnibus Model.</b>                         | <b>39</b> |
| 10.1      | Bias                                          | 42        |
| 10.2      | Moderation                                    | 44        |
| 10.2.1    | SES Measure moderation                        | 44        |
| 10.2.2    | Ext/Int moderation                            | 48        |
| 10.2.3    | Age moderation                                | 51        |
| 10.2.4    | Gender Moderation                             | 53        |
| 10.2.5    | % Racial Majority / White                     | 55        |
| 10.2.6    | % African American / Black                    | 57        |
| 10.2.7    | Adjustment Moderation                         | 59        |
| 10.2.8    | Weighting Moderation                          | 61        |
| 10.2.9    | Reporter Moderation                           | 63        |
| 10.2.10   | Poverty Focus                                 | 65        |
| 10.2.11   | Study Date                                    | 67        |
| 10.3      | Further Model Building                        | 69        |
| 10.3.1    | Final Model                                   | 73        |
| <b>11</b> | <b>SES clustered models</b>                   | <b>76</b> |
| 11.1      | Parent Education (continuous)                 | 77        |
| 11.2      | Parent Education (disordered)                 | 79        |
| 11.3      | Poverty Status (poverty line) (continuous)    | 81        |
| 11.4      | Poverty Status (poverty line) (disordered)    | 83        |
| 11.5      | Receipt of Public Assistance (continuous)     | 86        |
| 11.6      | Receipt of Public Assistance (disordered)     | 88        |
| 11.7      | Family Income (continuous)                    | 90        |
| 11.8      | Family Income (disordered)                    | 92        |
| 11.9      | Hollingshead (continuous)                     | 94        |
| 11.10     | Hollingshead (disordered)                     | 96        |

|           |                                                 |            |
|-----------|-------------------------------------------------|------------|
| 11.11     | Effects from Subjective Social Status . . . . . | 97         |
| <b>12</b> | <b>Figures</b>                                  | <b>97</b>  |
| 12.1      | Plotting Functions: component models . . . . .  | 97         |
| 12.2      | Dichotomous SES on symptoms. . . . .            | 101        |
| 12.3      | Continuous Income on Symptoms . . . . .         | 103        |
| 12.4      | Dichotomous SES on disorder. . . . .            | 105        |
| 12.5      | SMD in Income with Disorder . . . . .           | 107        |
| 12.6      | Omnibus Plot . . . . .                          | 109        |
| 12.6.1    | Plotting Function . . . . .                     | 109        |
| 12.6.2    | Call . . . . .                                  | 113        |
| 12.7      | Moderation Plot . . . . .                       | 114        |
| 12.7.1    | Plotting Function . . . . .                     | 114        |
| 12.7.2    | Call . . . . .                                  | 116        |
| <b>13</b> | <b>Tables</b>                                   | <b>116</b> |
| 13.1      | Table functions . . . . .                       | 116        |
| 13.2      | Bivariate Models (Table 1) . . . . .            | 118        |
| 13.3      | Moderation (Table 2) . . . . .                  | 119        |
| <b>14</b> | <b>Supplemental Analyses</b>                    | <b>120</b> |
| 14.1      | Interaction Model . . . . .                     | 120        |
| 14.2      | Sensitivity analysis. . . . .                   | 123        |
| 14.2.1    | Further Covariance Sensitivity Tests . . . . .  | 123        |
| 14.2.2    | Beta conversion . . . . .                       | 131        |
| <b>15</b> | <b>References</b>                               | <b>134</b> |

# 1 Analysis Code and Output

## 2 Session Info

This describes the R environment in which the analysis was run:

**R version 3.5.1 (2018-07-02)**

**Platform:** x86\_64-w64-mingw32/x64 (64-bit)

**locale:** *LC\_COLLATE=English\_United States.1252, LC\_CTYPE=English\_United States.1252, LC\_MONETARY=English\_United States.1252, LC\_NUMERIC=C and LC\_TIME=English\_United States.1252*

**attached base packages:** *grid, stats, graphics, grDevices, utils, datasets, methods and base*

**other attached packages:** *forestplot(v.1.7.2), checkmate(v.1.8.5), magrittr(v.1.5), dplyr(v.0.8.3), esc(v.0.4.1), knitr(v.1.26), metafor(v.2.0-0), Matrix(v.1.2-17), Hmisc(v.4.3-0), ggplot2(v.3.2.1), Formula(v.1.2-3), survival(v.3.1-7), lattice(v.0.20-38) and pander(v.0.6.3)*

**loaded via a namespace (and not attached):** *stringdist(v.0.9.5.2), Rcpp(v.1.0.2), tidyr(v.1.0.0), assertthat(v.0.2.0), zeallot(v.0.1.0), digest(v.0.6.18), R6(v.2.3.0), backports(v.1.1.2), acepack(v.1.4.1), evaluate(v.0.14), pillar(v.1.4.2), rlang(v.0.4.1), lazyeval(v.0.2.1), rstudioapi(v.0.8), data.table(v.1.12.6), rpart(v.4.1-13), rmarkdown(v.1.17), splines(v.3.5.1), readr(v.1.1.1), stringr(v.1.3.1), foreign(v.0.8-71), htmlwidgets(v.1.5.1), munsell(v.0.5.0), broom(v.0.5.0), compiler(v.3.5.1), xfun(v.0.11), pkgconfig(v.2.0.2), base64enc(v.0.1-3), htmltools(v.0.4.0), nnet(v.7.3-12), insight(v.0.8.3), tidyselect(v.0.2.5), tibble(v.2.1.3), gridExtra(v.2.3), htmlTable(v.1.12), crayon(v.1.3.4), withr(v.2.1.2), sjmisc(v.2.7.5), nlme(v.3.1-137), gtable(v.0.2.0), lifecycle(v.0.1.0), scales(v.1.0.0), stringi(v.1.2.4), latticeExtra(v.0.6-28), vctrs(v.0.2.0), sjlabelled(v.1.1.1), RColorBrewer(v.1.1-2), tools(v.3.5.1), forcats(v.0.3.0), glue(v.1.3.0), purrr(v.0.3.3), hms(v.0.4.2), parallel(v.3.5.1), yaml(v.2.2.0), colorspace(v.1.3-2), cluster(v.2.0.7-1) and haven(v.2.2.0)*

## 3 Variables

Descriptions of variables used in analysis:

| Variable                         | Label                            |
|----------------------------------|----------------------------------|
| study.ID [labelled, factor]      | ID of study (dataset)            |
| paper.ID [labelled, factor]      | ID of paper                      |
| cite [labelled, character]       | Citation                         |
| location [labelled, character]   | Location of effect in text       |
| n [labelled, integer]            |                                  |
| ageMean [labelled, numeric]      | mean age of participants         |
| whitePerc<br>[labelled, numeric] | Percent of sample reported white |
| IV [labelled, factor]            | SES Variable Type                |

| Variable                          | Label                                                   |
|-----------------------------------|---------------------------------------------------------|
| sesOper [labelled, character]     | Operationalization of SES                               |
| DV [labelled, factor]             | Psychopathology Variable Type                           |
| psychOper [labelled, character]   | Operationalization of Psych                             |
| measure [labelled, factor]        | Who reported the information and by what means          |
| Externalizing [labelled, logical] | Is the Outcome externalizing?                           |
| Continuous [labelled, logical]    | Is the outcome continuous?                              |
| adjusted [labelled, logical]      | Was the effect adjusted for covariates                  |
| weighted [labelled, logical]      | Was the effect calculated with sample weighting applied |
| wave [labelled, character]        | what wave of the study was the effect from              |
| date [labelled, numeric]          | Approx date of data collection                          |
| povFocus [labelled, logical]      | was poverty a major focus of the publication            |
| OR [labelled, numeric]            | raw odds ratio                                          |
| p [labelled, numeric]             | p value                                                 |
| SE [labelled, numeric]            | standard error                                          |
| ci.L [labelled, numeric]          | 2.5 percent confidence interval                         |
| ci.H [labelled, numeric]          | 97.5 percent confidence interval                        |
| r [labelled, numeric]             | bivariate correlation                                   |
| beta [labelled, numeric]          | standardized coefficient                                |
| ai [labelled, numeric]            | n with poverty and psychopathology                      |
| bi [labelled, numeric]            | n without poverty but pathology                         |
| ci [labelled, numeric]            | n with poverty without pathology                        |
| di [labelled, numeric]            | n without poverty or pathology                          |
| m1ia [labelled, numeric]          | mean psychopathology of poverty group                   |
| sd1ia [labelled, numeric]         | sd psychopathology of poverty group                     |
| n1ia [labelled, numeric]          | n of poverty group                                      |
| m2ia [labelled, numeric]          | mean psychopathology of no-poverty group                |
| sd2ia [labelled, numeric]         | sd psychopathology of no-poverty group                  |
| n2ia [labelled, numeric]          | n of no-poverty group                                   |
| m1ib [labelled, numeric]          | mean SES of dx group                                    |
| sd1ib [labelled, numeric]         | sd SES of dx group                                      |
| n1ib [labelled, integer]          | n of dx group                                           |
| m2ib [labelled, numeric]          | mean SES of dx- group                                   |

| Variable                  | Label               |
|---------------------------|---------------------|
| sd2ib [labelled, numeric] | sd SES of dx- group |
| n2ib [labelled, integer]  | n of dx- group      |
| rr [labelled, numeric]    | raw risk ratio      |
| f [labelled, numeric]     | f score             |

## 4 Sources

Location of effects pulled for meta-analysis:

| efid | study.ID | cite                   | location       | IV                            | DV                                          |
|------|----------|------------------------|----------------|-------------------------------|---------------------------------------------|
| 1    | CDP      | Lansford et al., 2006  | table 3; pg 23 | Hollingshead                  | Externalizing symptoms                      |
| 2    | CDP      | Lansford et al., 2006  | table 3; pg 23 | Hollingshead                  | Internalizing symptoms                      |
| 3    | GSM      | Costello et al., 1996* | calc           | Poverty Status (poverty line) | Externalizing symptoms                      |
| 4    | GSM      | Costello et al., 1996* | calc           | Parental Ed                   | Externalizing symptoms                      |
| 5    | GSM      | Costello et al., 1996* | calc           | Poverty Status (poverty line) | ADHD                                        |
| 6    | GSM      | Costello et al., 1996* | calc           | Poverty Status (poverty line) | PTSD                                        |
| 7    | GSM      | Costello et al., 1996* | calc           | Poverty Status (poverty line) | Depr.                                       |
| 8    | GSM      | Costello et al., 1996* | calc           | Poverty Status (poverty line) | Anx.                                        |
| 9    | GSM      | Costello et al., 1996* | calc           | Poverty Status (poverty line) | Disruptive behavior disorders (ODD/CONDUCT) |
| 10   | GSM      | Costello et al., 1996* | calc           | Parental Ed                   | ADHD                                        |
| 11   | GSM      | Costello et al., 1996* | calc           | Parental Ed                   | PTSD                                        |
| 12   | GSM      | Costello et al., 1996* | calc           | Parental Ed                   | Depr.                                       |
| 13   | GSM      | Costello et al., 1996* | calc           | Parental Ed                   | Anx.                                        |
| 14   | GSM      | Costello et al., 1996* | calc           | Parental Ed                   | Disruptive behavior disorders (ODD/CONDUCT) |
| 15   | MECA     | Lahey et al., 1996*    | calc           | Poverty Status (poverty line) | ADHD                                        |
| 16   | MECA     | Lahey et al., 1996*    | calc           | Family Income                 | ADHD                                        |

| efid | study.ID | cite                    | location | IV                            | DV                                          |
|------|----------|-------------------------|----------|-------------------------------|---------------------------------------------|
| 17   | MECA     | Lahey et al., 1996*     | calc     | Parental Ed                   | ADHD                                        |
| 18   | MECA     | Lahey et al., 1996*     | calc     | Receipt of Public Assistance  | ADHD                                        |
| 19   | MECA     | Lahey et al., 1996*     | calc     | Poverty Status (poverty line) | Depr.                                       |
| 20   | MECA     | Lahey et al., 1996*     | calc     | Family Income                 | Depr.                                       |
| 21   | MECA     | Lahey et al., 1996*     | calc     | Parental Ed                   | Depr.                                       |
| 22   | MECA     | Lahey et al., 1996*     | calc     | Receipt of Public Assistance  | Depr.                                       |
| 23   | MECA     | Lahey et al., 1996*     | calc     | Poverty Status (poverty line) | Anx.                                        |
| 24   | MECA     | Lahey et al., 1996*     | calc     | Family Income                 | Anx.                                        |
| 25   | MECA     | Lahey et al., 1996*     | calc     | Parental Ed                   | Anx.                                        |
| 26   | MECA     | Lahey et al., 1996*     | calc     | Receipt of Public Assistance  | Anx.                                        |
| 27   | MECA     | Lahey et al., 1996*     | calc     | Poverty Status (poverty line) | Disruptive behavior disorders (ODD/CONDUCT) |
| 28   | MECA     | Lahey et al., 1996*     | calc     | Family Income                 | Disruptive behavior disorders (ODD/CONDUCT) |
| 29   | MECA     | Lahey et al., 1996*     | calc     | Parental Ed                   | Disruptive behavior disorders (ODD/CONDUCT) |
| 30   | MECA     | Lahey et al., 1996*     | calc     | Receipt of Public Assistance  | Disruptive behavior disorders (ODD/CONDUCT) |
| 31   | NCSA     | McLaughlin et al., 2013 | Table S5 | Family Income                 | PTSD                                        |
| 32   | NCSA     | McLaughlin et al., 2013 | Table S5 | Parental Ed                   | PTSD                                        |
| 33   | NCSA     | Kessler et al., 2014    | Table 1  | Parental Ed                   | ADHD                                        |
| 34   | NCSA     | McLaughlin et al., 2012 | table 2  | Poverty Status (poverty line) | Depr.                                       |
| 35   | NCSA     | McLaughlin et al., 2012 | table 2  | Poverty Status (poverty line) | Anx.                                        |
| 36   | NCSA     | McLaughlin et al., 2012 | table 2  | Poverty Status (poverty line) | Disruptive behavior disorders (ODD/CONDUCT) |

| efid | study.ID | cite                    | location    | IV                            | DV                                             |
|------|----------|-------------------------|-------------|-------------------------------|------------------------------------------------|
| 37   | NCSA     | McLaughlin et al., 2012 | table 2     | Parental Ed                   | Depr.                                          |
| 38   | NCSA     | McLaughlin et al., 2012 | table 2     | Parental Ed                   | Anx.                                           |
| 39   | NCSA     | McLaughlin et al., 2012 | table 2     | Parental Ed                   | Disruptive behavior disorders<br>(ODD/CONDUCT) |
| 40   | NCSA     | McLaughlin et al., 2012 | table 2     | Subjective SES                | Depr.                                          |
| 41   | NCSA     | McLaughlin et al., 2012 | table 2     | Subjective SES                | Anx.                                           |
| 42   | NCSA     | McLaughlin et al., 2012 | table 2     | Subjective SES                | Disruptive behavior disorders<br>(ODD/CONDUCT) |
| 43   | NHANES   | Braun et al., 2008      | 4 (table 2) | Poverty Status (poverty line) | Disruptive behavior disorders<br>(ODD/CONDUCT) |
| 44   | NHANES   | Byrd, et. al., 2013     | Table 1     | Poverty Status (poverty line) | ADHD                                           |
| 45   | NHANES   | Merikangas et al., 2012 | Table 1     | Poverty Status (poverty line) | Depr.                                          |
| 46   | PGS      | Keenan et al., 2010     | pg 4        | Receipt of Public Assistance  | Disruptive behavior disorders<br>(ODD/CONDUCT) |
| 47   | PGS      | Hipwell et al., 2011    | pg 4        | Poverty Status (poverty line) | Disruptive behavior disorders<br>(ODD/CONDUCT) |
| 48   | PGS      | Hipwell et al., 2011    | pg 4        | Poverty Status (poverty line) | Depr.                                          |
| 49   | PHDCN    | Xue et al., 2005        | Table 3     | Parental Ed                   | Internalizing symptoms                         |
| 50   | PHDCN    | Xue et al., 2005        | Table 3     | Family Income                 | Internalizing symptoms                         |
| 51   | PHDCN    | Xue et al., 2005        | Table 3     | Receipt of Public Assistance  | Internalizing symptoms                         |
| 52   | PHDCN    | Xue et al., 2005        | Table 3     | Parental Ed                   | Internalizing symptoms                         |
| 53   | PHDCN    | Xue et al., 2005        | Table 3     | Family Income                 | Internalizing symptoms                         |
| 54   | PHDCN    | Xue et al., 2005        | Table 3     | Receipt of Public Assistance  | Internalizing symptoms                         |
| 55   | PHDCN    | Slopen et al., 2010     | 448 text    | Poverty Status (poverty line) | Internalizing symptoms                         |
| 56   | PHDCN    | Slopen et al., 2010     | 448 text    | Poverty Status (poverty line) | Externalizing symptoms                         |



| efid | study.ID | cite                      | location        | IV                            | DV                                          |
|------|----------|---------------------------|-----------------|-------------------------------|---------------------------------------------|
| 57   | PHDCN    | Zhang, 2012               | pg 42 (table 4) | Family Income                 | Internalizing symptoms                      |
| 58   | PHDCN    | Zhang, 2012               | pg 42 (table 4) | Family Income                 | Externalizing symptoms                      |
| 59   | PYS      | Maughan et al., 2003      | pg 5            | Hollingshead                  | Depr.                                       |
| 60   | PYS.m    | Loeber et al., 1998       | 170             | Hollingshead                  | ADHD                                        |
| 61   | PYS.y    | Loeber et al., 1998       | 170             | Receipt of Public Assistance  | ADHD                                        |
| 62   | PYS.m    | Loeber et al., 1998       | 172             | Hollingshead                  | Disruptive behavior disorders (ODD/CONDUCT) |
| 63   | PYS.o    | Loeber et al., 1998       | 172             | Hollingshead                  | Disruptive behavior disorders (ODD/CONDUCT) |
| 64   | PYS.y    | Loeber et al., 1998       | 172             | Receipt of Public Assistance  | Disruptive behavior disorders (ODD/CONDUCT) |
| 65   | PYS.m    | Loeber et al., 1998       | 172             | Receipt of Public Assistance  | Disruptive behavior disorders (ODD/CONDUCT) |
| 66   | PYS.o    | Loeber et al., 1998       | 172             | Receipt of Public Assistance  | Disruptive behavior disorders (ODD/CONDUCT) |
| 67   | PYS.y    | Loeber et al., 1998       | 172             | Parental Ed                   | Disruptive behavior disorders (ODD/CONDUCT) |
| 68   | PYS.o    | Loeber et al., 1998       | 172             | Parental Ed                   | Disruptive behavior disorders (ODD/CONDUCT) |
| 69   | PYS.y    | Loeber et al., 1998       | 205             | Hollingshead                  | Depr.                                       |
| 70   | PYS.y    | Loeber et al., 1998       | 205             | Receipt of Public Assistance  | Depr.                                       |
| 71   | PYS.m    | Loeber et al., 1998       | 205             | Receipt of Public Assistance  | Depr.                                       |
| 72   | PYS.y    | Loeber et al., 1998       | 205             | Parental Ed                   | Depr.                                       |
| 73   | CIC      | Cohen & Hesselbart, 1993* |                 | Family Income                 | ADHD                                        |
| 74   | CIC      | Cohen & Hesselbart, 1993* |                 | Poverty Status (poverty line) | ADHD                                        |

| efid | study.ID | cite                         | location | IV                               | DV                                                |
|------|----------|------------------------------|----------|----------------------------------|---------------------------------------------------|
| 75   | CIC      | Cohen & Hesselbart,<br>1993* |          | Parental Ed                      | ADHD                                              |
| 76   | CIC      | Cohen & Hesselbart,<br>1993* |          | Receipt of Public<br>Assistance  | ADHD                                              |
| 77   | CIC      | Cohen & Hesselbart,<br>1993* |          | Family Income                    | Depr.                                             |
| 78   | CIC      | Cohen & Hesselbart,<br>1993* |          | Poverty Status (poverty<br>line) | Depr.                                             |
| 79   | CIC      | Cohen & Hesselbart,<br>1993* |          | Parental Ed                      | Depr.                                             |
| 80   | CIC      | Cohen & Hesselbart,<br>1993* |          | Receipt of Public<br>Assistance  | Depr.                                             |
| 81   | CIC      | Cohen & Hesselbart,<br>1993* |          | Family Income                    | Anx.                                              |
| 82   | CIC      | Cohen & Hesselbart,<br>1993* |          | Poverty Status (poverty<br>line) | Anx.                                              |
| 83   | CIC      | Cohen & Hesselbart,<br>1993* |          | Parental Ed                      | Anx.                                              |
| 84   | CIC      | Cohen & Hesselbart,<br>1993* |          | Receipt of Public<br>Assistance  | Anx.                                              |
| 85   | CIC      | Cohen & Hesselbart,<br>1993* |          | Family Income                    | Disruptive behavior<br>disorders<br>(ODD/CONDUCT) |
| 86   | CIC      | Cohen & Hesselbart,<br>1993* |          | Poverty Status (poverty<br>line) | Disruptive behavior<br>disorders<br>(ODD/CONDUCT) |
| 87   | CIC      | Cohen & Hesselbart,<br>1993* |          | Parental Ed                      | Disruptive behavior<br>disorders<br>(ODD/CONDUCT) |
| 88   | CIC      | Cohen & Hesselbart,<br>1993* |          | Receipt of Public<br>Assistance  | Disruptive behavior<br>disorders<br>(ODD/CONDUCT) |
| 89   | CIC      | Cohen & Hesselbart,<br>1993* |          | Family Income                    | Internalizing symptoms                            |
| 90   | CIC      | Cohen & Hesselbart,<br>1993* |          | Poverty Status (poverty<br>line) | Internalizing symptoms                            |

| efid | study.ID | cite                         | location | IV                               | DV                      |
|------|----------|------------------------------|----------|----------------------------------|-------------------------|
| 91   | CIC      | Cohen & Hesselbart,<br>1993* |          | Parental Ed                      | Internalizing symptoms  |
| 92   | CIC      | Cohen & Hesselbart,<br>1993* |          | Receipt of Public<br>Assistance  | Internalizing symptoms  |
| 93   | CIC      | Cohen & Hesselbart,<br>1993* |          | Family Income                    | Externalizing symptoms  |
| 94   | CIC      | Cohen & Hesselbart,<br>1993* |          | Poverty Status (poverty<br>line) | Externalizing symptoms  |
| 95   | CIC      | Cohen & Hesselbart,<br>1993* |          | Parental Ed                      | Externalizing symptoms  |
| 96   | CIC      | Cohen & Hesselbart,<br>1993* |          | Receipt of Public<br>Assistance  | Externalizing symptoms  |
| 97   | FF       | Waller, 2001*                |          | Family Income                    | Externalizing symptoms  |
| 98   | FF       | Waller, 2001*                |          | Poverty Status (poverty<br>line) | Externalizing symptoms  |
| 99   | FF       | Waller, 2001*                |          | Parental Ed                      | Externalizing symptoms  |
| 100  | FF       | Waller, 2001*                |          | Receipt of Public<br>Assistance  | Externalizing symptoms  |
| 101  | FF       | Waller, 2001*                |          | Family Income                    | Externalizing symptoms2 |
| 102  | FF       | Waller, 2001*                |          | Poverty Status (poverty<br>line) | Externalizing symptoms2 |
| 103  | FF       | Waller, 2001*                |          | Parental Ed                      | Externalizing symptoms2 |
| 104  | FF       | Waller, 2001*                |          | Receipt of Public<br>Assistance  | Externalizing symptoms2 |
| 105  | FF       | Waller, 2001*                |          | Family Income                    | Internalizing symptoms2 |
| 106  | FF       | Waller, 2001*                |          | Poverty Status (poverty<br>line) | Internalizing symptoms2 |
| 107  | FF       | Waller, 2001*                |          | Parental Ed                      | Internalizing symptoms2 |
| 108  | FF       | Waller, 2001*                |          | Receipt of Public<br>Assistance  | Internalizing symptoms2 |
| 109  | NSPC     | McClure, 2007                | Table 8  | Hollingshead                     | Externalizing symptoms  |
| 110  | NSPC     | McClure, 2007                | Table 7  | Hollingshead                     | Internalizing symptoms  |
| 111  | NSPC     | McClure, 2007                | Table 8  | Receipt of Public<br>Assistance  | Externalizing symptoms  |
| 112  | NSPC     | McClure, 2007                | Table 7  | Receipt of Public<br>Assistance  | Internalizing symptoms  |

| efid | study.ID     | cite                                  | location | IV                            | DV    |
|------|--------------|---------------------------------------|----------|-------------------------------|-------|
| 113  | PSID.CDS2    | Panel Study of Income Dynamics, 2020* |          | Family Income                 | Depr. |
| 114  | PSID.CDS2    | Panel Study of Income Dynamics, 2020* |          | Poverty Status (poverty line) | Depr. |
| 115  | PSID.CDS2    | Panel Study of Income Dynamics, 2020* |          | Parental Ed                   | Depr. |
| 116  | PSID.CDS2    | Panel Study of Income Dynamics, 2020* |          | Receipt of Public Assistance  | Depr. |
| 117  | PSID.CDS2014 | Panel Study of Income Dynamics, 2020* |          | Family Income                 | Depr. |
| 118  | PSID.CDS2014 | Panel Study of Income Dynamics, 2020* |          | Poverty Status (poverty line) | Depr. |
| 119  | PSID.CDS2014 | Panel Study of Income Dynamics, 2020* |          | Parental Ed                   | Depr. |
| 120  | PSID.CDS2014 | Panel Study of Income Dynamics, 2020* |          | Receipt of Public Assistance  | Depr. |

\*: Data provided by study authors.

## 5 Sample Description Generation

```
#we should have one column with sample size per study ID. Specified manually:
agedf<-esdf[c(1,3,17,31,45,46,55,59,74,104,109,113,117),c("study.ID","n","ageMin","ageMax","ageMean",
"whitePerc","blackPerc","latPerc","femalePerc")]

with(agedf,weighted.mean(ageMean,n))

## [1] 12.35228

with(agedf,weighted.mean(whitePerc,n))

## [1] 0.508022

with(agedf,weighted.mean(blackPerc,n))

## [1] 0.2746456
```

```
with(agedf,weighted.mean(latPerc,n,na.rm=TRUE))
```

```
## [1] 0.2120555
```

```
with(agedf,weighted.mean(femalePerc,n,na.rm=TRUE))
```

```
## [1] 0.5035472
```

The combined sample represented 26715 children across the contiguous United States. The sample was 50.3547196% female, and 50.8022033% Non-Hispanic White. The sample represented children aged 3-19.3333333, with an average age of 12.3522782 years. Of the effects entered, 52.5% used combined methods (multiple reporters) to assess psychopathology, and -12.3333333% were unadjusted for covariates. Most associations (85%) were not taken from papers in which the association of family SES on psychopathology was a primary focus of the work.

## 6 Effect Size Calculations

We used a strategy from Borenstein (2009) to consolidate different sources of effects printed in the literature. Dichotomous SES to dichotomous psychopathology effects are converted in to log odds ratio. Continuous relationships are converted to z-transformed r. Continuous SES to dichotomous psychopathology and Dichotomous SES to continuous psychopathology effects are converted in to standard mean difference (d) and from there to Hedge's g (a bias corrected measure of standard mean difference).

Later, we will convert between these effect types for specific analyses.

### 6.1 OR calculation

First we will calculate log odds ratios. Data convertible to OR was given in one of two formats: 2x2 tables or odds ratio.

#### 6.1.1 2x2 tables

Log OR can be calculated for these effects using `metafor::escalc`. We will add .01 to 0 cells (this allows inclusion of studies which had no cases of psychopathology in the low SES group with a variance sufficiently large that they will not bias the finding, and sufficiently small that the effect will mostly fit on the plot).

```
esdf<-escalc(ai=ai,bi=bi,ci=ci,di=di,var.names=c("lOR","lOR.v"),measure="OR",data=esdf,append=TRUE,replace=FALSE,add=.01)
```

This provides the following values:

|          | n    | sesOper        | psychOper  | ai   | bi   | ci  | di   | lOR   | lOR.v |
|----------|------|----------------|------------|------|------|-----|------|-------|-------|
| <b>5</b> | 1420 | < Poverty Line | CAPA DSM-3 | 6    | 15   | 327 | 1025 | 0.21  | 0.24  |
| <b>6</b> | 1420 | < Poverty Line | CAPA DSM-3 | 0    | 0.42 | 313 | 998  | -2.6  | 102   |
| <b>7</b> | 1420 | < Poverty Line | CAPA DSM-3 | 0.44 | 2.2  | 333 | 1038 | -0.46 | 2.7   |

|           | n    | sesOper                             | psychOper                                              | ai   | bi   | ci   | di   | IOR   | IOR.v  |
|-----------|------|-------------------------------------|--------------------------------------------------------|------|------|------|------|-------|--------|
| <b>8</b>  | 1420 | < Poverty Line                      | CAPA DSM-3                                             | 30   | 39   | 303  | 1002 | 0.96  | 0.063  |
| <b>9</b>  | 1420 | < Poverty Line                      | CAPA DSM-3                                             | 44   | 48   | 289  | 992  | 1.1   | 0.048  |
| <b>10</b> | 1420 | < HS ed.                            | CAPA DSM-3                                             | 0.44 | 21   | 7.1  | 1384 | 1.4   | 2.5    |
| <b>11</b> | 1420 | < HS ed.                            | CAPA DSM-3                                             | 0    | 0.42 | 6.2  | 1337 | 1.6   | 102    |
| <b>12</b> | 1420 | < HS ed.                            | CAPA DSM-3                                             | 0    | 2.6  | 7.6  | 1402 | -0.35 | 101    |
| <b>13</b> | 1420 | < HS ed.                            | CAPA DSM-3                                             | 0.44 | 70   | 7.1  | 1334 | 0.15  | 2.4    |
| <b>14</b> | 1420 | < HS ed.                            | CAPA DSM-3                                             | 1.3  | 93   | 6.2  | 1311 | 1.1   | 0.93   |
| <b>15</b> | 970  | < Poverty Line                      |                                                        | 7    | 53   | 125  | 785  | -0.19 | 0.17   |
| <b>17</b> | 984  | < HS ed.                            |                                                        | 3    | 58   | 51   | 872  | -0.12 | 0.37   |
| <b>18</b> | 290  | “on public assistance<br>(welfare)” |                                                        | 5    | 8    | 57   | 220  | 0.88  | 0.35   |
| <b>19</b> | 970  | < Poverty Line                      |                                                        | 11   | 51   | 121  | 787  | 0.34  | 0.12   |
| <b>21</b> | 984  | < HS ed.                            |                                                        | 4    | 58   | 50   | 872  | 0.18  | 0.29   |
| <b>22</b> | 290  | “on public assistance<br>(welfare)” |                                                        | 8    | 19   | 54   | 209  | 0.49  | 0.2    |
| <b>23</b> | 970  | < Poverty Line                      |                                                        | 36   | 168  | 96   | 670  | 0.4   | 0.046  |
| <b>25</b> | 984  | < HS ed.                            |                                                        | 15   | 189  | 39   | 741  | 0.41  | 0.099  |
| <b>26</b> | 290  | “on public assistance<br>(welfare)” |                                                        | 16   | 45   | 46   | 183  | 0.35  | 0.11   |
| <b>27</b> | 970  | < Poverty Line                      |                                                        | 20   | 75   | 112  | 763  | 0.6   | 0.074  |
| <b>29</b> | 984  | < HS ed.                            |                                                        | 7    | 88   | 47   | 842  | 0.35  | 0.18   |
| <b>30</b> | 290  | “on public assistance<br>(welfare)” |                                                        | 16   | 18   | 46   | 210  | 1.4   | 0.14   |
| <b>43</b> | 3081 | PIR <1 (higher cells<br>summed)     | DISC CD crit. In 12<br>months                          | 25   | 40   | 875  | 2090 | 0.4   | 0.067  |
| <b>44</b> | 3081 | < Poverty Line                      | DISC Parent Interview                                  | 160  | 313  | 703  | 1759 | 0.24  | 0.011  |
| <b>45</b> | 4150 | < Poverty Line                      | DISC Adolescent<br>(16-19) or combined<br>DISC (12-15) | 47   | 89   | 1364 | 2650 | 0.015 | 0.034  |
| <b>46</b> | 2393 | public assistance any<br>year       | Met conduct disorder<br>any year                       | 440  | 120  | 939  | 894  | 1.3   | 0.013  |
| <b>55</b> | 2810 | < Poverty Line                      | Int >90 percentile<br>t-score                          | 627  | 427  | 2183 | 2383 | 0.47  | 0.0048 |
| <b>56</b> | 2810 | < Poverty Line                      | Ext >90 percentile<br>t-score                          | 289  | 160  | 2521 | 2650 | 0.64  | 0.01   |
| <b>74</b> | 776  | < Poverty Line                      | ADHD DISC crit and<br>>1SD symptoms                    | 26   | 67   | 96   | 582  | 0.86  | 0.066  |

|           | n   | sesOper                    | psychOper                                                                      | ai | bi  | ci  | di  | IOR  | IOR.v |
|-----------|-----|----------------------------|--------------------------------------------------------------------------------|----|-----|-----|-----|------|-------|
| <b>75</b> | 776 | max parent years<br>edu<12 | ADHD DISC crit and<br>>1SD symptoms                                            | 14 | 79  | 64  | 619 | 0.54 | 0.1   |
| <b>76</b> | 776 | Welfare                    | ADHD DISC crit and<br>>1SD symptoms                                            | 11 | 81  | 27  | 644 | 1.2  | 0.14  |
| <b>78</b> | 776 | < Poverty Line             | Depression DISC crit<br>and >1SD symptoms                                      | 11 | 14  | 111 | 635 | 1.5  | 0.17  |
| <b>79</b> | 776 | max parent years<br>edu<12 | Depression DISC crit<br>and >1SD symptoms                                      | 4  | 21  | 74  | 677 | 0.56 | 0.31  |
| <b>80</b> | 776 | Welfare                    | Depression DISC crit<br>and >1SD symptoms                                      | 4  | 21  | 34  | 704 | 1.4  | 0.33  |
| <b>82</b> | 776 | < Poverty Line             | so phobia, overanxious,<br>or separation anx DISC<br>crit and >1SD<br>symptoms | 42 | 132 | 80  | 517 | 0.72 | 0.046 |
| <b>83</b> | 776 | max parent years<br>edu<12 | so phobia, overanxious,<br>or separation anx DISC<br>crit and >1SD<br>symptoms | 28 | 148 | 50  | 550 | 0.73 | 0.064 |
| <b>84</b> | 776 | Welfare                    | so phobia, overanxious,<br>or separation anx DISC<br>crit and >1SD<br>symptoms | 17 | 156 | 21  | 569 | 1.1  | 0.11  |
| <b>86</b> | 776 | < Poverty Line             | add, opd or cd DISC<br>crit and >1SD<br>symptoms                               | 52 | 126 | 70  | 523 | 1.1  | 0.043 |
| <b>87</b> | 776 | max parent years<br>edu<12 | add, opd or cd DISC<br>crit and >1SD<br>symptoms                               | 30 | 150 | 48  | 548 | 0.83 | 0.063 |
| <b>88</b> | 776 | Welfare                    | add, opd or cd DISC<br>crit and >1SD<br>symptoms                               | 16 | 161 | 22  | 564 | 0.94 | 0.12  |

### 6.1.2 Raw OR

In the case of provided OR's, we just need to convert confidence intervals and p values to SE and log transform. Formulas for calculating SE from CI and p from cochrane reviews (Green & Higgins, 2011; section 7.7.7). First, confidence intervals and ORs are log transformed. Then formulas can be used to calculate SE from CI or a p value:

$$\sigma = \frac{CI_{high} - CI_{low}}{3.92}$$

When a p value is provided, the p value should be converted first to a z score using a standard table. Then:

$$\sigma = \frac{IOR}{Z(p)}$$

p calculated SE's will be approximate and conservative, since we are often working off a thresholded value (e.g. when the publication provided p<.05).

```
esdf[!is.na(esdf$OR)&!is.na(esdf$ci.L), "SE"]<-with(esdf[!is.na(esdf$OR)&!is.na(esdf$ci.L), ],
  (log(ci.H)-log(ci.L))/3.92)

esdf[!is.na(esdf$OR)&!is.na(esdf$p), "SE"]<-with(esdf[!is.na(esdf$OR)&!is.na(esdf$p), ],
  abs(log(OR)/qnorm(p)))

esdf[!is.na(esdf$OR), ]<-escalc(data=esdf[!is.na(esdf$OR), ],
  measure="OR",
  yi=log(OR),
  sei=SE,
  var.names=c("lor", "lor.v"),
  append=TRUE,
  replace=TRUE)
```

This outputs the following:

|           | n    | sesOper          | psychOper                            | OR  | SE   | p  | ci.L | ci.H | IOR  | IOR.v |
|-----------|------|------------------|--------------------------------------|-----|------|----|------|------|------|-------|
| <b>31</b> | 6483 | < 3*Poverty Line | CIDI combined<br>interview PTSD diag | 1.3 | 0.23 | NA | 0.8  | 2    | 0.26 | 0.055 |
| <b>32</b> | 6483 | No college       | CIDI combined<br>interview PTSD diag | 1   | 0.18 | NA | 0.7  | 1.4  | 0    | 0.031 |
| <b>33</b> | 6483 | < HS ed.         | CIDI combined<br>interview ADHD diag | 1.7 | 0.22 | NA | 1.1  | 2.6  | 0.53 | 0.048 |
| <b>34</b> | 6483 | < 1.5*Poverty    |                                      | 1   | 0.25 | NA | 0.6  | 1.6  | 0    | 0.063 |
| <b>35</b> | 6483 | < 1.5*Poverty    |                                      | 1.3 | 0.15 | NA | 1    | 1.8  | 0.26 | 0.022 |
| <b>36</b> | 6483 | < 1.5*Poverty    | DBD diagnosis                        | 1.2 | 0.19 | NA | 0.8  | 1.7  | 0.18 | 0.037 |
| <b>37</b> | 6483 | < HS ed.         |                                      | 1   | 0.21 | NA | 0.7  | 1.6  | 0    | 0.044 |
| <b>38</b> | 6483 | < HS ed.         |                                      | 1.7 | 0.13 | NA | 1.3  | 2.2  | 0.53 | 0.018 |
| <b>39</b> | 6483 | < HS ed.         | DBD diagnosis                        | 1.5 | 0.25 | NA | 0.9  | 2.4  | 0.41 | 0.063 |



|           | n    | sesOper                  | psychOper                                                                         | OR  | SE    | p     | ci.L | ci.H | IOR   | IOR.v  |
|-----------|------|--------------------------|-----------------------------------------------------------------------------------|-----|-------|-------|------|------|-------|--------|
| <b>40</b> | 6483 | Community Ladder         |                                                                                   | 0.8 | 0.034 | NA    | 0.7  | 0.8  | -0.22 | 0.0012 |
| <b>41</b> | 6483 | Community Ladder         |                                                                                   | 0.8 | 0.03  | NA    | 0.8  | 0.9  | -0.22 | 9e-04  |
| <b>42</b> | 6483 | Community Ladder         | Behavior Disorder                                                                 | 0.7 | 0.034 | NA    | 0.7  | 0.8  | -0.36 | 0.0012 |
| <b>59</b> | 1509 | low SES (Hollingshead=1) | thresholded SMFQ value                                                            | 1.7 | 0.2   | NA    | 1.2  | 2.6  | 0.53  | 0.039  |
| <b>60</b> | 508  | low SES (Hollingshead=1) | 25% threshold of ADHD, high overlap with diagnosis                                | 1.6 | 0.29  | 0.05  | NA   | NA   | 0.47  | 0.082  |
| <b>61</b> | 503  | Welfare                  | 25% threshold of ADHD, high overlap with diagnosis                                | 1.7 | 0.23  | 0.01  | NA   | NA   | 0.53  | 0.052  |
| <b>62</b> | 508  | low SES (Hollingshead=1) | 25% threshold of Conduct, moderate overlap with diagnosis                         | 2   | 0.3   | 0.01  | NA   | NA   | 0.69  | 0.089  |
| <b>63</b> | 506  | low SES (Hollingshead=1) | 25% threshold of Conduct, moderate overlap with diagnosis                         | 1.5 | 0.25  | 0.05  | NA   | NA   | 0.41  | 0.061  |
| <b>64</b> | 503  | Welfare                  | 25% threshold of Conduct, moderate overlap with diagnosis                         | 2.2 | 0.26  | 0.001 | NA   | NA   | 0.79  | 0.065  |
| <b>65</b> | 508  | Welfare                  | 25% threshold of Conduct, moderate overlap with diagnosis                         | 1.7 | 0.32  | 0.05  | NA   | NA   | 0.53  | 0.1    |
| <b>66</b> | 506  | Welfare                  | 25% threshold of Conduct, moderate overlap with diagnosis                         | 2.3 | 0.27  | 0.001 | NA   | NA   | 0.83  | 0.073  |
| <b>67</b> | 503  | < HS ed.                 | 25% threshold of Conduct, moderate overlap with diagnosis. Mothers ed <12th grade | 1.5 | 0.25  | 0.05  | NA   | NA   | 0.41  | 0.061  |

|           | n   | sesOper                  | psychOper                                                  | OR  | SE   | p     | ci.L | ci.H | IOR  | IOR.v |
|-----------|-----|--------------------------|------------------------------------------------------------|-----|------|-------|------|------|------|-------|
| <b>68</b> | 506 | < HS ed.                 | 25% threshold of Conduct, moderate overlap with diagnosis. | 2.2 | 0.26 | 0.001 | NA   | NA   | 0.79 | 0.065 |
| <b>69</b> | 503 | low SES (Hollingshead=1) | total score on SMF, but how did they get an OR?            | 1.6 | 0.29 | 0.05  | NA   | NA   | 0.47 | 0.082 |
| <b>70</b> | 503 | Welfare                  | total score on SMF, but how did they get an OR?            | 1.9 | 0.28 | 0.01  | NA   | NA   | 0.64 | 0.076 |
| <b>71</b> | 508 | Welfare                  | total score on SMF, but how did they get an OR?            | 1.7 | 0.32 | 0.05  | NA   | NA   | 0.53 | 0.1   |
| <b>72</b> | 503 | < HS ed.                 | total score on SMF, but how did they get an OR?            | 1.5 | 0.25 | 0.05  | NA   | NA   | 0.41 | 0.061 |

## 6.2 g calculation

### 6.2.1 Mean and standard deviation

This is a straightforward calculation from metafor's `escalc` function. In our data frame, the relevant variables are as follows:

| m1ia                                  | sd1ia                               | n1ia               | m2ia                                     | sd2ia                                  | n2ia                  |
|---------------------------------------|-------------------------------------|--------------------|------------------------------------------|----------------------------------------|-----------------------|
| mean psychopathology of poverty group | sd psychopathology of poverty group | n of poverty group | mean psychopathology of no-poverty group | sd psychopathology of no-poverty group | n of no-poverty group |

```
esdf$g<-NA
esdf$g.v<-NA
esdf[!is.na(esdf$sd1ia),]<-escalc(data=esdf[!is.na(esdf$sd1ia),],
  measure="SMD",
  m1i=m1ia,
  sd1i=sd1ia,
  n1i=n1ia,
  m2i=m2ia,
```

```

sd2i=sd2ia,
n2i=n2ia,
var.names=c("g","g.v"),
append=TRUE,
replace=TRUE)

```

|            | n    | sesOper                       | psychOper                                           | mlia | sdlia | nlia | m2ia  | sd2ia | n2ia | g     | g.v    |
|------------|------|-------------------------------|-----------------------------------------------------|------|-------|------|-------|-------|------|-------|--------|
| <b>3</b>   | 1420 | < Poverty Line                | CBCL Problem Score                                  | 14   | 9.5   | 461  | 11    | 7.2   | 889  | 0.31  | 0.0033 |
| <b>4</b>   | 1420 | < HS ed.                      | CBCL Problem Score                                  | 13   | 5.5   | 20   | 12    | 7.8   | 1249 | 0.11  | 0.051  |
| <b>90</b>  | 776  | < Poverty Line                | sum z score of DISC dep, sep anx, overanx, soc phob | 1.2  | 3.7   | 122  | -0.24 | 2.9   | 649  | 0.48  | 0.0099 |
| <b>91</b>  | 776  | max parent years edu<12       | sum z score of DISC dep, sep anx, overanx, soc phob | 1.2  | 3.6   | 78   | -0.13 | 3     | 698  | 0.44  | 0.014  |
| <b>92</b>  | 776  | Welfare                       | sum z score of DISC dep, sep anx, overanx, soc phob | 2    | 4     | 38   | -0.1  | 3     | 725  | 0.69  | 0.028  |
| <b>94</b>  | 776  | < Poverty Line                | sum z score of DISC add, conduct, odd               | 1    | 3     | 122  | -0.2  | 2.4   | 649  | 0.48  | 0.0099 |
| <b>95</b>  | 776  | max parent years edu<12       | sum z score of DISC add, conduct, odd               | 1.3  | 3.2   | 78   | -0.15 | 2.4   | 698  | 0.58  | 0.014  |
| <b>96</b>  | 776  | Welfare                       | sum z score of DISC add, conduct, odd               | 1.2  | 3     | 38   | -0.07 | 2.5   | 725  | 0.48  | 0.028  |
| <b>98</b>  | 1589 | < Poverty Line                | Sum of CBCL Ext. items                              | 11   | 6.6   | 561  | 9.4   | 5.4   | 1028 | 0.21  | 0.0028 |
| <b>99</b>  | 1588 | Less than HS Degree           | Sum of CBCL Ext. items                              | 10   | 6.7   | 257  | 9.8   | 5.7   | 1331 | 0.076 | 0.0046 |
| <b>100</b> | 1589 | Received free food/Foodstamps | Sum of CBCL Ext. items                              | 11   | 6.5   | 543  | 9.2   | 5.4   | 1046 | 0.3   | 0.0028 |

|            | n    | sesOper                           | psychOper                 | mlia | sdlia | n1ia | m2ia | sd2ia | n2ia | g     | g.v    |
|------------|------|-----------------------------------|---------------------------|------|-------|------|------|-------|------|-------|--------|
| <b>102</b> | 2246 | < Poverty Line                    | Sum of CBCL<br>Ext. items | 42   | 9     | 731  | 40   | 6     | 1515 | 0.33  | 0.0021 |
| <b>103</b> | 2259 | Less than HS<br>Degree            | Sum of CBCL<br>Ext. items | 42   | 10    | 297  | 41   | 6.5   | 1962 | 0.25  | 0.0039 |
| <b>104</b> | 2282 | Received free<br>food/Foodstamps  | Sum of CBCL<br>Ext. items | 44   | 6.6   | 214  | 41   | 7.2   | 2068 | 0.42  | 0.0052 |
| <b>106</b> | 2246 | < Poverty Line                    | Sum of CBCL<br>Int. items | 39   | 7.5   | 731  | 36   | 4.7   | 1515 | 0.35  | 0.0021 |
| <b>107</b> | 2259 | < HS ed.                          | Sum of CBCL<br>Int. items | 38   | 8.3   | 297  | 37   | 5.3   | 1962 | 0.24  | 0.0039 |
| <b>108</b> | 2282 | Received free<br>food/Foodstamps  | Sum of CBCL<br>Int. items | 39   | 5.9   | 214  | 37   | 5.7   | 2068 | 0.4   | 0.0052 |
| <b>114</b> | 1455 | < Poverty Line                    | Sum of CDI:S              | 2.9  | 3.2   | 178  | 2.7  | 3.3   | 1277 | 0.053 | 0.0064 |
| <b>115</b> | 1409 | Less than HS<br>Degree            | Sum of CDI:S              | 2.9  | 3.3   | 221  | 2.7  | 3.2   | 1188 | 0.08  | 0.0054 |
| <b>116</b> | 1452 | Received<br>Foodstamps or<br>TANF | Sum of CDI:S              | 3.1  | 3.3   | 156  | 2.7  | 3.3   | 1296 | 0.1   | 0.0072 |
| <b>118</b> | 1045 | < Poverty Line                    | Sum of CDI:S              | 2.3  | 3.2   | 145  | 2.2  | 2.5   | 900  | 0.019 | 0.008  |
| <b>119</b> | 1064 | Less than HS<br>Degree            | Sum of CDI:S              | 2.8  | 3.6   | 124  | 2.2  | 2.5   | 940  | 0.23  | 0.0092 |
| <b>120</b> | 1045 | Received<br>Foodstamps or<br>TANF | Sum of CDI:S              | 2.4  | 3.1   | 212  | 2.2  | 2.5   | 833  | 0.08  | 0.0059 |

### 6.2.2 F test

2 effects provided an F score from an anova model comparing depression and disruptive symptoms in groups above/below the poverty line. We can most safely convert this effect to g, as it represents a dichotomous IV and continuous DV.

Calculation of SMD from an F test comparing two groups of unequal size is provided by David Wilson's website as a companion to Lipsey and Wilson's textbook. Implementation in R is provided by the 'esc' package (Lipsey & Wilson, 2000; Lüdtke, 2018).

```
esdf[!is.na(esdf$f),c("g","g.v")]<-as.data.frame(with(esdf[!is.na(esdf$f)],esc::esc_f(f=f,
  es.type="g",
  totaln=n,
  grp1n=n1ia,
  grp2n=n2ia)))[,c("es","var")]
```

|    | n    | sesOper        | psychOper               | f  | n1ia | n2ia | g    | g.v    |
|----|------|----------------|-------------------------|----|------|------|------|--------|
| 47 | 1232 | < Poverty Line | CSI/ASI severity scores | 40 | 419  | 813  | 0.36 | 0.0033 |
| 48 | 1232 | < Poverty Line | CSI/ASI severity scores | 13 | 419  | 813  | 0.21 | 0.0033 |

### 6.2.3 Continuous SES, Dichotomous Psychopathology

These are also calculated as g, but were entered using a separate set of variables to reflect the different interpretation. We also calculate point biserial correlation. However, calculating standard mean difference is more appropriate given the data we have, as converting to correlation makes more assumptions about the underlying data (Pustejovsky, 2014). We therefore use the standard mean difference in our analyses.

The relevant variables are:

| m1ib                 | sd1ib              | n1ib          | m2ib                     | sd2ib                  | n2ib              |
|----------------------|--------------------|---------------|--------------------------|------------------------|-------------------|
| mean SES of dx group | sd SES of dx group | n of dx group | mean SES of dx-<br>group | sd SES of dx-<br>group | n of dx-<br>group |

The interpretation is standard mean difference in SES with diagnosis.

```

esdf$rpbc<-NA
esdf$rpbc.v<-NA

#Point biserial corr. is calculated but not used.
esdf[!is.na(esdf$m1ib),]<-escalc(data=esdf[!is.na(esdf$m1ib),],
  measure="RPB",
  m1i=m1ib,
  sd1i=sd1ib,
  n1i=n1ib,
  m2i=m2ib,
  sd2i=sd2ib,
  n2i=n2ib,
  var.names=c("rpb","rpb.v"),
  vtype="ST",
  append=TRUE,
  replace=TRUE)

#Calculate SMD
esdf[!is.na(esdf$rpbc),]<-escalc(data=esdf[!is.na(esdf$rpbc),],

```

```

measure="SMD",
m1i=m1ib,
sd1i=sd1ib,
n1i=n1ib,
m2i=m2ib,
sd2i=sd2ib,
n2i=n2ib,
var.names=c("g", "g.v"),
append=TRUE,
replace=TRUE)

```

This yields:

|           | n   | sesOper                 | psychOper                                                                         | m1ib  | sd1ib | n1ib | m2ib  | sd2ib | n2ib | g     | g.v    |
|-----------|-----|-------------------------|-----------------------------------------------------------------------------------|-------|-------|------|-------|-------|------|-------|--------|
| <b>16</b> | 970 | Continuous \$<br>Income |                                                                                   | 48233 | 30159 | 60   | 54896 | 33047 | 910  | -0.2  | 0.018  |
| <b>20</b> | 970 | Continuous \$<br>Income |                                                                                   | 49362 | 35000 | 62   | 54833 | 32744 | 908  | -0.17 | 0.017  |
| <b>24</b> | 970 | Continuous \$<br>Income |                                                                                   | 49823 | 33095 | 204  | 55725 | 32759 | 766  | -0.18 | 0.0062 |
| <b>28</b> | 970 | Continuous \$<br>Income |                                                                                   | 43063 | 30016 | 95   | 55724 | 32977 | 875  | -0.39 | 0.012  |
| <b>73</b> | 771 | dollar income           | ADHD DISC crit<br>and >1SD<br>symptoms                                            | 21352 | 15757 | 93   | 27440 | 15334 | 678  | -0.4  | 0.012  |
| <b>77</b> | 771 | dollar income           | Depression DISC<br>crit and >1SD<br>symptoms                                      | 18405 | 14012 | 25   | 26984 | 15482 | 746  | -0.56 | 0.042  |
| <b>81</b> | 771 | dollar income           | so phobia,<br>overanxious, or<br>separation anx<br>DISC crit and<br>>1SD symptoms | 22212 | 14145 | 174  | 28016 | 15646 | 597  | -0.38 | 0.0075 |
| <b>85</b> | 771 | dollar income           | add, opd or cd<br>DISC crit and<br>>1SD symptoms                                  | 21417 | 14955 | 178  | 28293 | 15323 | 593  | -0.45 | 0.0074 |

### 6.3 Z transformed r (Zr) calculation

#### 6.3.1 Regression coefficient (beta)

These effects are provided as  $\beta$  coefficients of SES variables in psychopathology models. There is some controversy about whether r values can safely be inputted from  $\beta$  in meta-analysis. In the case of an unadjusted model,  $\beta$  and r are equivalent, but assuming the coefficient is from a more complex model some bias is introduced. Peterson and Brown (2005) suggested the following formula:

$$r = .98\beta + .05\lambda$$

Where  $\lambda = 1$  if  $\beta$  is nonnegative and  $\lambda = 0$  if  $\beta$  is negative. In their paper, Peterson and Brown argue that this approach is superior to inputting the raw beta formula, an effect of zero, or leaving the effect out of the analysis. Since one beta weight was zero, we will assume that lambda should be 0 in that case so as not to inflate the indicator of no relationship.

However, Roth et al. (2018) conducted a set of simulation studies examining the efficiency of this method and found that, even in the best case, estimates of population are not more accurate than if these results are simply omitted. However, Roth et al. note that they did not perform simulations at low k values (as will be the case in many of our analyses). We will proceed to impute these values, but we additionally include a sensitivity analyses where they are omitted at the end of the document.

```
PetersonBetaToR<-function(beta) {
  lambda<-as.numeric(!beta<=0) # returns FALSE if beta is non-negative, which codes as 0.
  r=.98*beta+.05*lambda
  r
}

esdf[!is.na(esdf$beta)&is.na(esdf$r),"r"]<-sapply(esdf[!is.na(esdf$beta)&is.na(esdf$r),"beta"],PetersonBetaToR)
```

|    | n    | IV                           | sesOper         | DV                     | psychOper                  | beta   | r      |
|----|------|------------------------------|-----------------|------------------------|----------------------------|--------|--------|
| 49 | 2805 | Parental Ed                  | < HS ed.        | Internalizing symptoms | continuous internalizing   | 0.097  | 0.15   |
| 50 | 2805 | Family Income                | Income to Needs | Internalizing symptoms | continuous internalizing   | -0.048 | -0.047 |
| 51 | 2805 | Receipt of Public Assistance |                 | Internalizing symptoms | continuous internalizing   | 0.042  | 0.091  |
| 52 | 2805 | Parental Ed                  | < HS ed.        | Internalizing symptoms | dichotomized internalizing | 0.14   | 0.18   |
| 53 | 2805 | Family Income                | Income to Needs | Internalizing symptoms | dichotomized internalizing | -0.16  | -0.16  |
| 54 | 2805 | Receipt of Public Assistance |                 | Internalizing symptoms | dichotomized internalizing | 0.015  | 0.065  |

|            | n   | IV                           | sesOper                                                           | DV                     | psychOper               | beta  | r       |
|------------|-----|------------------------------|-------------------------------------------------------------------|------------------------|-------------------------|-------|---------|
| <b>109</b> | 823 | Hollingshead                 | SES stress' coded 1-3 where 3 represents a low hollingshead index | Externalizing symptoms | ACQ Externalizing Scale | 0     | 0       |
| <b>110</b> | 823 | Hollingshead                 | SES stress' coded 1-3 where 3 represents a low hollingshead index | Internalizing symptoms | ACQ Internalizing Scale | -0.04 | -0.039  |
| <b>111</b> | 823 | Receipt of Public Assistance | # of forms of Assistance                                          | Externalizing symptoms | ACQ Externalizing Scale | 0.1   | 0.15    |
| <b>112</b> | 823 | Receipt of Public Assistance | # of forms of Assistance                                          | Internalizing symptoms | ACQ Internalizing Scale | -0.01 | -0.0098 |

These effects will now be included in the z to r transformation below.

### 6.3.2 r

This is also a straightforward calculation provided by `escalc`. At the sample sizes we are working with, the z value is not much different from r.

```
esdf$Zr<-NA
esdf$Zr.v<-NA
esdf[!is.na(esdf$r),]<-escalc(data=esdf[!is.na(esdf$r),],
  measure="ZCOR",
  ri=r,
  ni=n,
  var.names=c("Zr","Zr.v"),
  append=TRUE,
  replace=TRUE)
```

|           | n    | sesOper                 | psychOper                  | beta   | r      | Zr     | Zr.v    |
|-----------|------|-------------------------|----------------------------|--------|--------|--------|---------|
| <b>1</b>  | 585  | Continuous Hollingshead | TRF Problem Score          | NA     | -0.23  | -0.23  | 0.0017  |
| <b>2</b>  | 585  | Continuous Hollingshead | TRF Problem Score          | NA     | -0.12  | -0.12  | 0.0017  |
| <b>49</b> | 2805 | < HS ed.                | continuous internalizing   | 0.097  | 0.15   | 0.15   | 0.00036 |
| <b>50</b> | 2805 | Income to Needs         | continuous internalizing   | -0.048 | -0.047 | -0.047 | 0.00036 |
| <b>51</b> | 2805 |                         | continuous internalizing   | 0.042  | 0.091  | 0.091  | 0.00036 |
| <b>52</b> | 2805 | < HS ed.                | dichotomized internalizing | 0.14   | 0.18   | 0.19   | 0.00036 |



|            | n    | sesOper                                                                 | psychOper                                                 | beta  | r       | Zr      | Zr.v    |
|------------|------|-------------------------------------------------------------------------|-----------------------------------------------------------|-------|---------|---------|---------|
| <b>53</b>  | 2805 | Income to Needs                                                         | dichotomized                                              | -0.16 | -0.16   | -0.16   | 0.00036 |
|            |      |                                                                         | internalizing                                             |       |         |         |         |
| <b>54</b>  | 2805 |                                                                         | dichotomized                                              | 0.015 | 0.065   | 0.065   | 0.00036 |
|            |      |                                                                         | internalizing                                             |       |         |         |         |
| <b>57</b>  | 1517 | continuous income                                                       | YSR continuous                                            | NA    | -0.07   | -0.07   | 0.00066 |
| <b>58</b>  | 1517 | continuous income                                                       | YSR continuous                                            | NA    | -0.03   | -0.03   | 0.00066 |
| <b>89</b>  | 771  | dollar income                                                           | sum z score of DISC dep,<br>sep anx, overanx, soc<br>phob | NA    | -0.21   | -0.21   | 0.0013  |
| <b>93</b>  | 771  | dollar income                                                           | sum z score of DISC add,<br>conduct, odd                  | NA    | -0.18   | -0.18   | 0.0013  |
| <b>97</b>  | 1589 | dollar income                                                           | Sum of CBCL Ext. items                                    | NA    | -0.082  | -0.082  | 0.00063 |
| <b>101</b> | 2257 | dollar income                                                           | Sum of CBCL Ext. items                                    | NA    | -0.13   | -0.14   | 0.00044 |
| <b>105</b> | 2230 | dollar income                                                           | Sum of CBCL Int. items                                    | NA    | -0.11   | -0.11   | 0.00045 |
| <b>109</b> | 823  | SES stress' coded 1-3<br>where 3 represents a low<br>hollingshead index | ACQ Externalizing Scale                                   | 0     | 0       | 0       | 0.0012  |
| <b>110</b> | 823  | SES stress' coded 1-3<br>where 3 represents a low<br>hollingshead index | ACQ Internalizing Scale                                   | -0.04 | -0.039  | -0.039  | 0.0012  |
| <b>111</b> | 823  | # of forms of Assistance                                                | ACQ Externalizing Scale                                   | 0.1   | 0.15    | 0.15    | 0.0012  |
| <b>112</b> | 823  | # of forms of Assistance                                                | ACQ Internalizing Scale                                   | -0.01 | -0.0098 | -0.0098 | 0.0012  |
| <b>113</b> | 1455 | dollar income                                                           | Sum of CDI:S                                              | NA    | 0.011   | 0.011   | 0.00069 |
| <b>117</b> | 1045 | dollar income                                                           | Sum of CDI:S                                              | NA    | -0.0041 | -0.0041 | 0.00096 |

## 6.4 Data check

Since we are going to do some secondary conversions now, let's make a factor variable to keep track of what parameter was originally entered.

```
esdf$p.entered<-NA
esdf[is.na(esdf$rp) & is.na(esdf$g) & is.na(esdf$Zr),]$p.entered<-"1OR"
esdf[is.na(esdf$rp) & is.na(esdf$1OR) & is.na(esdf$Zr),]$p.entered<-"g"
esdf[!is.na(esdf$rp) & is.na(esdf$1OR) & is.na(esdf$Zr),]$p.entered<-"g2"
esdf[is.na(esdf$rp) & is.na(esdf$1OR) & is.na(esdf$g),]$p.entered<-"Zr"
```

We should now have 1 and only 1 meta-analysis ready parameter for each study, and a p.entered var for every row.

| efd | parameters | entered |
|-----|------------|---------|
| 1   | 1          | Zr      |
| 2   | 1          | Zr      |
| 3   | 1          | g       |
| 4   | 1          | g       |
| 5   | 1          | IOR     |
| 6   | 1          | IOR     |
| 7   | 1          | IOR     |
| 8   | 1          | IOR     |
| 9   | 1          | IOR     |
| 10  | 1          | IOR     |
| 11  | 1          | IOR     |
| 12  | 1          | IOR     |
| 13  | 1          | IOR     |
| 14  | 1          | IOR     |
| 15  | 1          | IOR     |
| 16  | 1          | g2      |
| 17  | 1          | IOR     |
| 18  | 1          | IOR     |
| 19  | 1          | IOR     |
| 20  | 1          | g2      |
| 21  | 1          | IOR     |
| 22  | 1          | IOR     |
| 23  | 1          | IOR     |
| 24  | 1          | g2      |
| 25  | 1          | IOR     |
| 26  | 1          | IOR     |
| 27  | 1          | IOR     |
| 28  | 1          | g2      |
| 29  | 1          | IOR     |
| 30  | 1          | IOR     |
| 31  | 1          | IOR     |
| 32  | 1          | IOR     |
| 33  | 1          | IOR     |
| 34  | 1          | IOR     |
| 35  | 1          | IOR     |
| 36  | 1          | IOR     |
| 37  | 1          | IOR     |

| efd | parameters | entered        |
|-----|------------|----------------|
| 38  | 1          | IOR            |
| 39  | 1          | IOR            |
| 40  | 1          | IOR            |
| 41  | 1          | IOR            |
| 42  | 1          | IOR            |
| 43  | 1          | IOR            |
| 44  | 1          | IOR            |
| 45  | 1          | IOR            |
| 46  | 1          | IOR            |
| 47  | 1          | g              |
| 48  | 1          | g              |
| 49  | 1          | Zr             |
| 50  | 1          | Zr             |
| 51  | 1          | Zr             |
| 52  | 1          | Zr             |
| 53  | 1          | Zr             |
| 54  | 1          | Zr             |
| 55  | 1          | IOR            |
| 56  | 1          | IOR            |
| 57  | 1          | Zr             |
| 58  | 1          | Zr             |
| 59  | 1          | IOR            |
| 60  | 1          | IOR            |
| 61  | 1          | IOR            |
| 62  | 1          | IOR            |
| 63  | 1          | IOR            |
| 64  | 1          | IOR            |
| 65  | 1          | IOR            |
| 66  | 1          | IOR            |
| 67  | 1          | IOR            |
| 68  | 1          | IOR            |
| 69  | 1          | IOR            |
| 70  | 1          | IOR            |
| 71  | 1          | IOR            |
| 72  | 1          | IOR            |
| 73  | 1          | g <sup>2</sup> |
| 74  | 1          | IOR            |

| efd | parameters | entered        |
|-----|------------|----------------|
| 75  | 1          | lOR            |
| 76  | 1          | lOR            |
| 77  | 1          | g <sup>2</sup> |
| 78  | 1          | lOR            |
| 79  | 1          | lOR            |
| 80  | 1          | lOR            |
| 81  | 1          | g <sup>2</sup> |
| 82  | 1          | lOR            |
| 83  | 1          | lOR            |
| 84  | 1          | lOR            |
| 85  | 1          | g <sup>2</sup> |
| 86  | 1          | lOR            |
| 87  | 1          | lOR            |
| 88  | 1          | lOR            |
| 89  | 1          | Z <sub>r</sub> |
| 90  | 1          | g              |
| 91  | 1          | g              |
| 92  | 1          | g              |
| 93  | 1          | Z <sub>r</sub> |
| 94  | 1          | g              |
| 95  | 1          | g              |
| 96  | 1          | g              |
| 97  | 1          | Z <sub>r</sub> |
| 98  | 1          | g              |
| 99  | 1          | g              |
| 100 | 1          | g              |
| 101 | 1          | Z <sub>r</sub> |
| 102 | 1          | g              |
| 103 | 1          | g              |
| 104 | 1          | g              |
| 105 | 1          | Z <sub>r</sub> |
| 106 | 1          | g              |
| 107 | 1          | g              |
| 108 | 1          | g              |
| 109 | 1          | Z <sub>r</sub> |
| 110 | 1          | Z <sub>r</sub> |
| 111 | 1          | Z <sub>r</sub> |

| efd | parameters | entered |
|-----|------------|---------|
| 112 | 1          | Zr      |
| 113 | 1          | Zr      |
| 114 | 1          | g       |
| 115 | 1          | g       |
| 116 | 1          | g       |
| 117 | 1          | Zr      |
| 118 | 1          | g       |
| 119 | 1          | g       |
| 120 | 1          | g       |

## 7 Effect Parameter Conversion

We will sometimes need to convert our effects (IOR, g, r) in to each other to run particular analyses. This is particularly central for the omnibus model, so we should build some convenience functions for readability. These will rely on the particular data structure for this analysis, so they are not particularly portable, but the underlying logic should be easy to follow.

### 7.1 Formulas

#### 7.1.1 Z to g

Borenstein's (2009) formula refers to  $V_r$ , which makes no sense for raw r, so the formula must be referring to z transformed R. Borenstein's formula is on page 48 (formula 7.5 and 7.6) and is as follows:

$$d = \frac{2r}{\sqrt{1-r^2}}$$

$$V_d = \frac{4V_r}{(1-r^2)^3}$$

Although our samples are sufficiently large that the process is unlikely to produce large corrections, it is recommended to use a bias corrected form of d, hedge's g. This is provided by the following set of formulas, also from Borenstein (2009):

$$J = 1 - \frac{3}{4df - 1}$$

$$g = J \times d$$

$$V_g = J^2 \times V_d$$

Here is the function:

```

dtg<-function(n,d,vd){
  df<-n-2 # We are assuming 2 groups by conducting this analysis.
  J=1-3/(4*df-1)
  g=J*d
  g.v=J^2*vd
  c(g,g.v)
}

ztd<-function(rownum) {
  n<-esdf [rownum, "n"]
  r<-esdf [rownum, "Zr"]
  vr<-esdf [rownum, "Zr.v"]
  d<-2*r/sqrt(1-r^2)
  vd<-4*vr/((1-r^2)^3)
  c(d,vd)
}

ztg<-function(rownum) {
  n<-esdf [rownum, "n"]
  d<-ztd(rownum) [1]
  vd<-ztd(rownum) [2]
  dtg(n,d,vd)
}

```

### 7.1.2 OR to g

Borenstein (2009) gives:

$$d = IOR \times \frac{\sqrt{3}}{\pi}$$

and:

$$V_d = V_{IOR} \times \frac{3}{\pi^2}$$

g can then be calculated as above

```

lORtg<-function(rownum){
  n<-esdf [rownum, "n"]
  lOR<-esdf [rownum, "lOR"]
  lOR.v<-esdf [rownum, "lOR.v"]
  d<-lOR*(sqrt(3)/pi)
}

```

```
d.v<-lOR.v*(3/(pi^2))
dtg(n,d,d.v)
}
```

### 7.1.3 g to OR

Borenstein (2009) provides this formula:

$$lOR = d \frac{\pi}{\sqrt{3}}$$

$$V_{lOR} = V_d \frac{\pi^2}{3}$$

```
# The algebraic reversal of the formula for d to g can be problematic,
# but is unlikely to cause problems with our large samples.
gtd<-function(n,g,g.v){
  df<-n-2 # We are assuming 2 groups by conducting this analysis.
  J=1-3/(4*df-1)
  d=g/J
  vd=g.v/J^2
  c(d,vd)
}

gtlOR<-function(rownum) {
  n<-esdf[rownum,"n"]
  g<-esdf[rownum,"g"]
  g.v<-esdf[rownum,"g.v"]
  d<-gtd(n,g,g.v)[1]
  d.v<-gtd(n,g,g.v)[2]
  lOR<-d*(pi/sqrt(3))
  lOR.v<-d.v*(pi^2/3)
  c(lOR,lOR.v)
}
```

### 7.1.4 z to OR

First we convert to d, and then to OR from d as above.

```
ztlOR<-function(rownum) {
  n<-esdf[rownum,"n"]
```

```

d<-ztd(rownum)[1]
d.v<-ztd(rownum)[2]
1OR<-d*(pi/sqrt(3))
1OR.v<-d.v*(pi^2/3)
c(1OR,1OR.v)
}

```

### 7.1.5 g to z

Borenstein (2009) gives:

$$r = \frac{d}{\sqrt{d^2 + a}}$$

$$a = \frac{(n_1 + n_2)^2}{n_1 n_2}$$

$$V_r = \frac{a^2 V_d}{(D^2 + a)^3}$$

```

gtz<-function(rownum) {
  n1<-esdf[rownum,]$n1ib
  n2<-esdf[rownum,]$n2ib
  g<-esdf[rownum,"g"]
  g.v<-esdf[rownum,"g.v"]
  d<-gtd(n1+n2,g,g.v)[1]
  d.v<-gtd(n1+n2,g,g.v)[2]
  a<-(n1+n2^2)/(n1*n2)
  Zr<-d/sqrt(d^2+a)
  Zr.v<-(a^2*d.v)/(d^2+a)^3
  c(Zr,Zr.v)
}

```

### 7.1.6 OR to z

We convert from OR to d as above. Then Borenstein (2009) gives:

$$r = \frac{d}{\sqrt{d^2 + a}}$$

$$V_r = \frac{a^2 V_d}{(d^2 + a)^3}$$



a is based on n1 and n2, which are not known here, so we can approximate a=4.

```
lORtz<-function(rownum) {  
  n<-esdf[rownum, "n"]  
  lOR<-esdf[rownum, "lOR"]  
  lOR.v<-esdf[rownum, "lOR.v"]  
  d<-lOR*(sqrt(3)/pi)  
  d.v<-lOR.v*(3/(pi^2))  
  r=d/sqrt(d^2+4)  
  r.v=(16*d.v)/(d^2+4)^3  
  c(r, r.v)  
}
```

## 7.2 Data conversion

Everything will need to be converted to OR and g. One odds ratio will need to be converted to Zr. To minimize the calculations, we will do this by entered parameter.

from g to lOR:

```
trows<-which(esdf$p.entered=="g" | esdf$p.entered=="rpb")  
esdf[trows, c("lOR", "lOR.v")]<-t(sapply(trows, gt1OR))
```

From lOR to g:

```
trows<-which(esdf$p.entered=="lOR")  
esdf[trows, c("g", "g.v")]<-t(sapply(trows, lORtg))
```

From zr to g & lOR:

```
trows<-which(esdf$p.entered=="Zr")  
esdf[trows, c("g", "g.v")]<-t(sapply(trows, ztg))  
esdf[trows, c("lOR", "lOR.v")]<-t(sapply(trows, zt1OR))
```

From g to z (we'll just do this for the effect that needs it).

```
trows<-69
esdf[trows,c("Zr","Zr.v")]<-t(sapply(trows,0Rtz))
```

## 8 Reverse Coding

The g scores for family income, subjective SES, and Hollingshead (only for CDP) are often (but not always) reversed from where we want them for a combined analysis, because higher values of the predictor indicate more resources rather than less (as is the case with poverty, parent ed, public assistance). We will code a new variable, gcor, such that a higher g always represents more psychopathology with fewer resources.

```
esdf$gcor<-esdf$g
rev<-esdf[esdf$IV %in% c("Family Income","Hollingshead","Subjective SES"),"efid"]
rev<-rev[!rev%in%c("31","59","60","62","63","69","109","110")]
esdf[esdf$efid %in% rev,]$gcor<-esdf[esdf$efid %in% rev,]$g*-1
```

|    | study.ID | IV             | sesOper                  | g      | gcor  | efid |
|----|----------|----------------|--------------------------|--------|-------|------|
| 1  | CDP      | Hollingshead   | Continuous Hollingshead  | -0.48  | 0.48  | 1    |
| 2  | CDP      | Hollingshead   | Continuous Hollingshead  | -0.24  | 0.24  | 2    |
| 16 | MECA     | Family Income  | Continuous \$ Income     | -0.2   | 0.2   | 16   |
| 20 | MECA     | Family Income  | Continuous \$ Income     | -0.17  | 0.17  | 20   |
| 24 | MECA     | Family Income  | Continuous \$ Income     | -0.18  | 0.18  | 24   |
| 28 | MECA     | Family Income  | Continuous \$ Income     | -0.39  | 0.39  | 28   |
| 31 | NCSA     | Family Income  | < 3*Poverty Line         | 0.14   | 0.14  | 31   |
| 40 | NCSA     | Subjective SES | Community Ladder         | -0.12  | 0.12  | 40   |
| 41 | NCSA     | Subjective SES | Community Ladder         | -0.12  | 0.12  | 41   |
| 42 | NCSA     | Subjective SES | Community Ladder         | -0.2   | 0.2   | 42   |
| 50 | PHDCN    | Family Income  | Income to Needs          | -0.094 | 0.094 | 50   |
| 53 | PHDCN    | Family Income  | Income to Needs          | -0.33  | 0.33  | 53   |
| 57 | PHDCN    | Family Income  | continuous income        | -0.14  | 0.14  | 57   |
| 58 | PHDCN    | Family Income  | continuous income        | -0.06  | 0.06  | 58   |
| 59 | PYS      | Hollingshead   | low SES (Hollingshead=1) | 0.29   | 0.29  | 59   |
| 60 | PYS.m    | Hollingshead   | low SES (Hollingshead=1) | 0.26   | 0.26  | 60   |
| 62 | PYS.m    | Hollingshead   | low SES (Hollingshead=1) | 0.38   | 0.38  | 62   |
| 63 | PYS.o    | Hollingshead   | low SES (Hollingshead=1) | 0.22   | 0.22  | 63   |
| 69 | PYS.y    | Hollingshead   | low SES (Hollingshead=1) | 0.26   | 0.26  | 69   |
| 73 | CIC      | Family Income  | dollar income            | -0.4   | 0.4   | 73   |
| 77 | CIC      | Family Income  | dollar income            | -0.56  | 0.56  | 77   |
| 81 | CIC      | Family Income  | dollar income            | -0.38  | 0.38  | 81   |

|            | study.ID     | IV            | sesOper                                                                 | g       | gcor   | efid |
|------------|--------------|---------------|-------------------------------------------------------------------------|---------|--------|------|
| <b>85</b>  | CIC          | Family Income | dollar income                                                           | -0.45   | 0.45   | 85   |
| <b>89</b>  | CIC          | Family Income | dollar income                                                           | -0.43   | 0.43   | 89   |
| <b>93</b>  | CIC          | Family Income | dollar income                                                           | -0.37   | 0.37   | 93   |
| <b>97</b>  | FF           | Family Income | dollar income                                                           | -0.16   | 0.16   | 97   |
| <b>101</b> | FF           | Family Income | dollar income                                                           | -0.27   | 0.27   | 101  |
| <b>105</b> | FF           | Family Income | dollar income                                                           | -0.22   | 0.22   | 105  |
| <b>109</b> | NSPC         | Hollingshead  | SES stress' coded 1-3 where<br>3 represents a low<br>hollingshead index | 0       | 0      | 109  |
| <b>110</b> | NSPC         | Hollingshead  | SES stress' coded 1-3 where<br>3 represents a low<br>hollingshead index | -0.078  | -0.078 | 110  |
| <b>113</b> | PSID.CDS2    | Family Income | dollar income                                                           | 0.022   | -0.022 | 113  |
| <b>117</b> | PSID.CDS2014 | Family Income | dollar income                                                           | -0.0082 | 0.0082 | 117  |

(According to their SES operationalization, all of these but 31, 59, 60, 62, 63, 69, 109, 110 should be reversed)

## 9 Covariance Estimation

Formally, we need to provide a covariance matrix because our effects are not independent. Some of the more common strategies to work around this requirement are not practical in our case: we can't rely on our multilevel model to account for covariance because our samples are not independent, and we don't have enough degrees of freedom to use robust estimation. We also can't get a complete and perfectly accurate covariance matrix:

- We don't have complete correlation data for every study (although we are on better than average ground here).
- For some models we have overlapping 'treatment' categories (i.e., public assistance and poverty are substantially overlapping) and correlated 'outcome' variables. To the best of our knowledge there are no well-established methods for calculating covariance between effect sizes in this circumstance.

Although this is a formal requirement, in practice, the three level model has been shown to deal with dependency of effects well (Van den Noortgate et al., 2013). It also weights effects such that the analysis is not unduly biased towards studies with more effects.

Our approach will be to perform basic modeling with a diagonal covariance structure and then test sensitivity to higher levels of effect covariance within studies. We can use correlations between SES and psychopathology variables to find the highest correlation between component variables in each effect, then use the distribution of these correlations to get a 'high estimate' of correlation between component variables. Conducting a sensitivity test based on the high end of the range will represent a best effort to calculate covariance based on correlations between psychopathology and SES variables. We also present sensitivity tests over a wider range of covariance estimates at the end of this document under 'supplemental analyses.'

## 9.1 Covariance calculations

`var_rho_estimate` calculates an estimated correlation between psychopathology variables (or SES variables in cases where the psychopathology variables are the same) within each study and outputs a list of correlation tables.

These correlations can then be provided to formulas provided by Wei & Higgins (2013) (implemented in the ‘metavcov’ package). The formulas are specific to the `g` parameter.

```
#This is a matrix of correlations between psychopathology variables based on MECA and GSM
psychcorr<-read.csv("Psych Correlations-meca and copeland.csv",check.names=FALSE,row.names=1)

sescorlist<-readRDS("sescorlist.Rds") #A list of per-study correlation matrices between SES variables
sescorlist[['FF']]<-sescorlist[['ff']]
sescorlist<-lapply(sescorlist,rbind,Hollingshead=0,"Subjective SES"=0) #NAs or Nulls don't appear to work here.
sescorlist<-lapply(sescorlist,cbind,Hollingshead=0,"Subjective SES"=0)
imputed_rhos<-list()
for(name in levels(esdf$study.ID)) {
  if(name %in% names(sescorlist)) {
    imputed_rhos[[name]]<-sescorlist[[name]]
  } else {
    imputed_rhos[[name]]<-sescorlist[["default"]]
  }
}

#This function estimates the highest correlation between non-shared component variables related to each effect in a cohort.

var_rho_estimate<-function(df,use_ses=TRUE) {
  vi_list<-split(df$g.v,df$study.ID,drop=TRUE)
  dv_list<-split(df$DV,df$study.ID,drop=TRUE)
  iv_list<-split(df$IV,df$study.ID,drop=TRUE)
  r_list <-lapply(dv_list,function(X) as.matrix(psychcorr[as.character(X),as.character(X)]))
  r2_list<-lapply(seq_along(iv_list),
    function(y, n, i) {
      as.matrix(imputed_rhos[[n[[i]]]][as.character(y[[i]]),as.character(y[[i]])])
    },
    y=iv_list, n=names(iv_list)) #i is the sequence here as it is not specified
  r3_list<-lapply(seq_along(r_list),
    function(y, i) {
      ifelse(y[[i]]==1,r2_list[[i]],y[[i]])
    },
```

```

        y=r_list)
r4_list<-lapply(r3_list,function(x) {diag(x)<-1; x})
if(use_ses) {
  return(r4_list)
} else {
  return(r_list)
}
}

```

## 9.2 Estimate of covariance based on FF at year 9.

We will use FF for a ballpark estimate of variable correlations as we have the most data for that study. Here are the effects in question:

|            | efid | IVshort    | DVshort | p.entered |
|------------|------|------------|---------|-----------|
| <b>102</b> | 102  | Poverty    | Ext. w2 | g         |
| <b>103</b> | 103  | Parent Ed. | Ext. w2 | g         |
| <b>104</b> | 104  | Assistance | Ext. w2 | g         |
| <b>106</b> | 106  | Poverty    | Int. w2 | g         |
| <b>107</b> | 107  | Parent Ed. | Int. w2 | g         |
| <b>108</b> | 108  | Assistance | Int. w2 | g         |

Only two outcomes but 6 effects. We're going to treat each outcome-treatment pair as an 'outcome' and use our above functions to estimate their likely covariance from what we know about the correlation structure of the FF data. We will just look at SMD where we have group counts.

Although the function optionally accepts one, we don't have an estimate of overlapping events (i.e. families with poverty and low parental education). This is ok: the function either uses the r value OR assumes the smaller 'treatment' group is entirely overlapping, which should provide a liberal estimate of covariance, which is what we want for a sensitivity test anyway.

```

ffdf<-esdf[esdf$study.ID=="FF" & esdf$DV!="Externalizing symptoms" & !is.na(esdf$n1ia),]
ffvcov<-metavcov::smd.vcov(nt=t(as.matrix(ffdf$n1ia)),
  nc=t(as.matrix(ffdf$n2ia)),
  d=t(as.matrix(ffdf$g)),
  r=var_rho_estimate(ffdf))$list.smd.cov[[1]]

```

Estimated covariance between effects is now given by ffvcov:

|         |         |         |         |         |         |
|---------|---------|---------|---------|---------|---------|
| 0.002   | 0.00047 | 0.00092 | 0.00056 | 0.00052 | 0.00052 |
| 0.00047 | 0.0039  | 0.00045 | 0.00052 | 0.0011  | 0.0011  |

|         |         |         |         |         |         |
|---------|---------|---------|---------|---------|---------|
| 0.00092 | 0.00045 | 0.0052  | 0.00052 | 0.0011  | 0.0014  |
| 0.00056 | 0.00052 | 0.00052 | 0.002   | 0.00047 | 0.00092 |
| 0.00052 | 0.0011  | 0.0011  | 0.00047 | 0.0039  | 0.00045 |
| 0.00052 | 0.0011  | 0.0014  | 0.00092 | 0.00045 | 0.0052  |

We can then use `cov2cor` to print implied correlations between effects:

|      |      |      |      |      |      |
|------|------|------|------|------|------|
| 1    | 0.17 | 0.28 | 0.28 | 0.19 | 0.16 |
| 0.17 | 1    | 0.1  | 0.19 | 0.28 | 0.24 |
| 0.28 | 0.1  | 1    | 0.16 | 0.24 | 0.28 |
| 0.28 | 0.19 | 0.16 | 1    | 0.17 | 0.28 |
| 0.19 | 0.28 | 0.24 | 0.17 | 1    | 0.1  |
| 0.16 | 0.24 | 0.28 | 0.28 | 0.1  | 1    |

These should be saved:

```
ffescorr<-cov2cor(ffvcov)
diag(ffescorr)<-NA
```

Considering this set of correlations, mean correlation is 0.2063259, 5th and 95th percentile are 0.1009511, 0.282318.

We'll repeat this with GSM, which we also have relevant data for (albeit with fewer effects), to see if FF is an outlier:

```
gsmdf<-esdf[esdf$study.ID=="GSM" & !is.na(esdf$n1ia),]
gsmvcov<-metavcov::smd.vcov(nt=t(as.matrix(gsmdf$n1ia)),
  nc=t(as.matrix(gsmdf$n2ia)),
  d=t(as.matrix(gsmdf$g)),
  r=var_rho_estimate(gsmdf))$list.smd.cov[[1]]
pander(cov2cor(gsmvcov))
```

|       |       |
|-------|-------|
| 1     | 0.054 |
| 0.054 | 1     |

GSM shows lower correlations.

Now we make variables based on the distribution from FF:

```

corestlow<-.1010
corestmid<-.2063
coresthhigh<-.2823

```

These estimates would be stronger with a formula that accounted simultaneously for overlapping treatments and correlated outcomes, but an average correlation between effect sizes of 0.2063 (CI [0.101-0.2823]) is likely a good broad estimate, although it may be biased somewhat low. We can do sensitivity analyses within this range, which should allow us to get past this issue (since, again, we expect the three level model to take care of this problem in practice). We will also conduct some sensitivity tests with more arbitrary values later.

The following is a wrapper function for `clubSandwich::impute_covariance_matrix` which we will use to supply covariance matrices to our models.

Going in to the modeling code: `clubSandwich::impute_covariance_matrix(vi, "study.ID", coresthhigh)` will estimate a covariance matrix based on an imputed correlation between effects of .2823, a value taken from the 95th percentile of our estimated correlations above.

```

get_covariance_matrix<-function (vi, dv, cluster, return_list = identical(as.factor(cluster),
  sort(as.factor(cluster))))
{ clubSandwich::impute_covariance_matrix(vi, cluster, coresthhigh)}

```

## 10 Omnibus Model.

We will try and put everything in to the same model. This approach gives us more power with which to analyze moderation. Some concerns with this approach: we are making some assumptions about the nature of the data by converting everything to  $g$ , and (as opposed to a single predictor approach) and correlations between SES measures are an additional source of non-independence. However, in practice the first issue is commonly ignored and the second is handled well by our multivariate approach. We later present bivariate models as a more assumption-free alternative

```

m.combined<-rma.mv(yi=gcov,
  V=g.v,
  random=~1 | study.ID/efid,
  slab=paste(study.ID, efid, sep=" "),
  data=esdf
)

m.combined.corestlow<-rma.mv(yi=gcov,
  V=clubSandwich::impute_covariance_matrix(esdf$g.v, esdf$study.ID, corestlow),
  random=~1 | study.ID/efid,
  slab=paste(study.ID, efid, sep=" "),
  data=esdf
)

m.combined.corestmid<-rma.mv(yi=gcov,

```

```

V=clubSandwich::impute_covariance_matrix(esdf$g.v, esdf$study.ID, corestmid),
random=~1 | study.ID/efid,
slab=paste(study.ID, efid, sep=" "),
data=esdf
)

m.combined.coresthhigh<-rma.mv(yi=gcor,
V=clubSandwich::impute_covariance_matrix(esdf$g.v, esdf$study.ID, coresthhigh),
random=~1 | study.ID/efid,
slab=paste(study.ID, efid, sep=" "),
data=esdf
)

summary(m.combined)

##
## Multivariate Meta-Analysis Model (k = 120; method: REML)
##
##   logLik  Deviance      AIC      BIC      AICc
##  42.6230  -85.2460  -79.2460  -70.9087  -79.0373
##
## Variance Components:
##
##           estim  sqrt  nlvls  fixed      factor
## sigma^2.1  0.0158  0.1257   16     no      study.ID
## sigma^2.2  0.0068  0.0826  120     no  study.ID/efid
##
## Test for Heterogeneity:
## Q(df = 119) = 497.1743, p-val < .0001
##
## Model Results:
##
## estimate      se    zval    pval   ci.lb   ci.ub
##  0.2491  0.0352  7.0660 <.0001  0.1800  0.3182 ***
##
## ---
## Signif. codes:  0 '***' 0.001 '**' 0.01 '*' 0.05 '.' 0.1 ' ' 1

```



```

confint(m.combined)

## [[1]]
##
##      estimate ci.lb ci.ub
## sigma^2.1   0.0158 0.0069 0.0398
## sigma.1     0.1257 0.0828 0.1994
##
##
## [[2]]
##
##      estimate ci.lb ci.ub
## sigma^2.2   0.0068 0.0038 0.0116
## sigma.2     0.0826 0.0619 0.1077

comptable<-function(models,labels){
  table<-data.frame(sapply(models,
    function(X) c(X$b,ci.lb=X$ci.lb[[1]],ci.ub=X$ci.ub[[1]],X$sigma2)))
  colnames(table)<-labels
  rownames(table)<-c(dimnames(models[[1]]$b)[[1]],"int.ci.l","int.ci.u","s2between","s2within")
  table$diff<-table[,dim(table)[2]]-table[,1]
  table
}

m.combined.comptable<-comptable(list(m.combined,m.combined.corestlow,m.combined.corestmid,m.combined.coresthgh),
  c("none","low","mid","high"))

```

The model is very heterogeneous, with a spread in precision past the center line.

|                  | none   | low    | mid    | high   | diff    |
|------------------|--------|--------|--------|--------|---------|
| <b>intrcpt</b>   | 0.25   | 0.25   | 0.24   | 0.24   | -0.0052 |
| <b>int.ci.l</b>  | 0.18   | 0.18   | 0.18   | 0.18   | -0.0035 |
| <b>int.ci.u</b>  | 0.32   | 0.31   | 0.31   | 0.31   | -0.0068 |
| <b>s2between</b> | 0.016  | 0.014  | 0.013  | 0.013  | -0.0029 |
| <b>s2within</b>  | 0.0068 | 0.0072 | 0.0077 | 0.0081 | 0.0012  |

Our covariance estimates introduce relatively little variation. Difference in estimate between highest and none is about .005 (in standard units).

## 10.1 Bias

We need to test for publication bias in the analysis. The usual way to do this is to perform a test of funnel plot symmetry. There are a number of problems with this approach, namely that it is not necessarily robust to multi-level modeling and is generally not considered appropriate when there is substantial heterogeneity. What's more, several of the usually performed statistical tests can't be run on multilevel meta-analytic models. We will use Egger's regression test by testing the moderating effect of variance (see <https://stat.ethz.ch/pipermail/r-sig-meta-analysis/2018-February/000610.html>). We can also draw a funnel plot. Finally, a test for moderation by poverty focus is a final, and more elegant, way to test for bias.

```
m.combined.eggers<-rma.mv(yi=gcor,
                          V=g.v,
                          mods= ~ g.v ,
                          random=~1 | study.ID/efid,
                          slab=paste(study.ID, efid,povFocus,sep=" "),
                          data=esdf
                          )

summary(m.combined.eggers)
```

```
##
## Multivariate Meta-Analysis Model (k = 120; method: REML)
##
##   logLik  Deviance      AIC      BIC      AICc
##  45.2377  -90.4755  -82.4755  -71.3927  -82.1215
##
## Variance Components:
##
##           estim  sqrt  nlvls  fixed      factor
## sigma^2.1  0.0158  0.1258   16    no      study.ID
## sigma^2.2  0.0068  0.0826  120    no  study.ID/efid
##
## Test for Residual Heterogeneity:
## QE(df = 118) = 496.6381, p-val < .0001
##
## Test of Moderators (coefficient(s) 2):
## QM(df = 1) = 0.0185, p-val = 0.8919
##
## Model Results:
##
##           estimate      se    zval    pval    ci.lb  ci.ub
## intrcpt    0.2493  0.0353   7.0622 <.0001  0.1801  0.3184 ***
```

```
## g.v      -0.0139  0.1023  -0.1359  0.8919  -0.2144  0.1866
##
## ---
## Signif. codes:  0 '***' 0.001 '**' 0.01 '*' 0.05 '.' 0.1 ' ' 1
```

There is little evidence of effect variance on estimates. This indicates that smaller/less accurate studies (which generally are more prone to bias) don't show larger or smaller effects than large ones.

```
funnel(m.combined,pch=19,cex=.4,xlab = "SMD (g)")
```

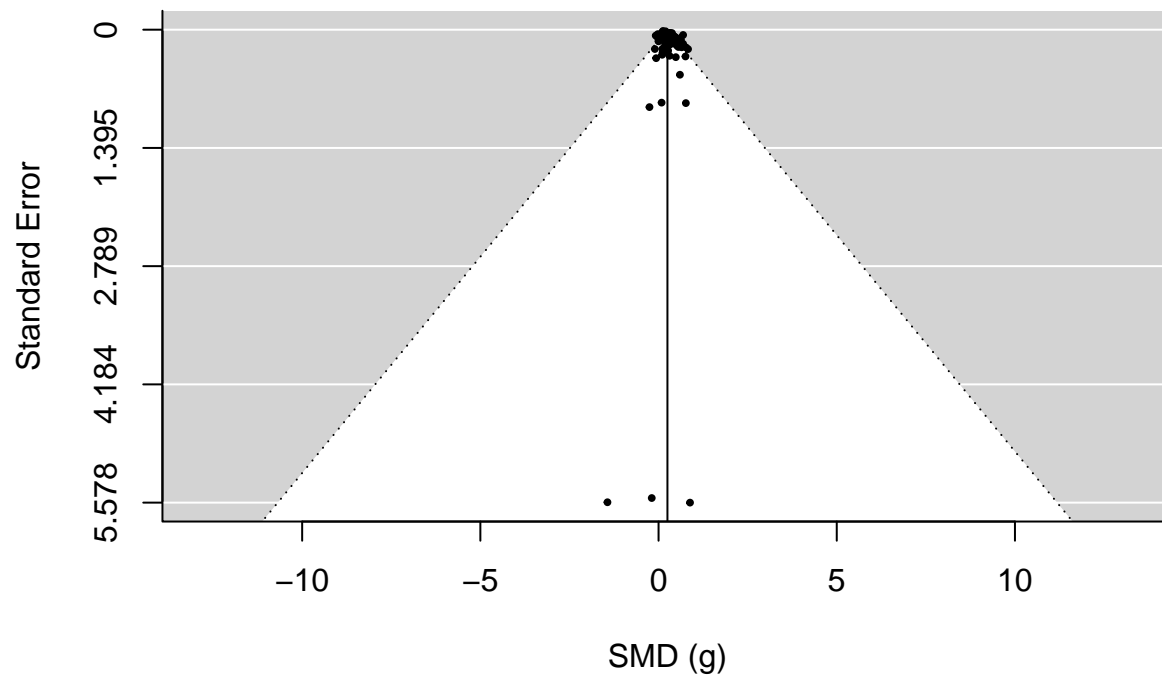

```
#svg(filename="plot-funnel.svg",height=3.25,width=3.25,pointsize=10,family="sans")
funnel(m.combined,ylim=c(0,.4),xlim=c(-.5,1),pch=19,cex=.4,xlab = "SMD (g)")
```

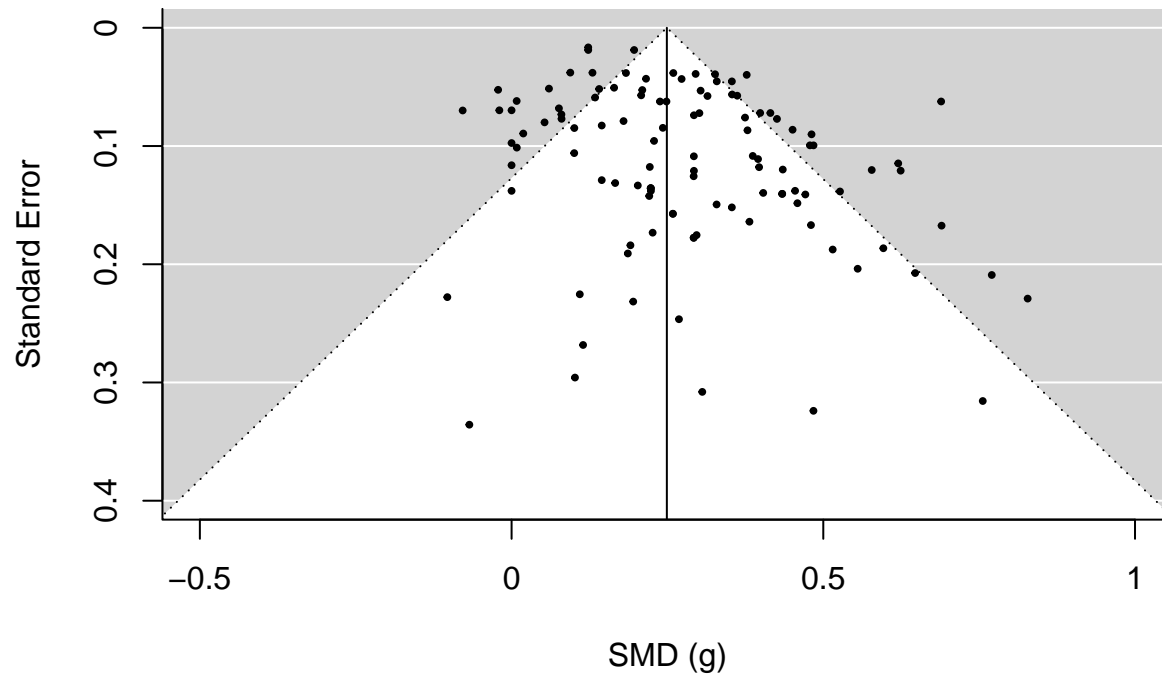

```
#dev.off()
```

The funnel plot is not obviously asymmetrical. Our moderator test of poverty focus was not significant. The default plot is hard to read, because a few effects from studies without psychopathology had very large variance (these are from studies where little or no psychopathology was reported). Therefore, in the article, a few effects with se above .4 are not displayed.

## 10.2 Moderation

### 10.2.1 SES Measure moderation

```

m.combined.iv<-rma.mv(yi=gcor,
                     V=g.v,
                     mods= ~ IVshort,
                     random=~1 | study.ID/efid,
                     slab=paste(study.ID, efid,IVshort,sep=" "),
                     data=esdf,
                     intercept=TRUE,
                     )

m.combined.iv.corestlow<-rma.mv(yi=gcor,
                                V=clubSandwich::impute_covariance_matrix(esdf$g.v,esdf$study.ID,.21),
                                mods= ~ IVshort,
                                random=~1 | study.ID/efid,
                                slab=paste(study.ID, efid,IVshort,sep=" "),
                                data=esdf
                                )

m.combined.iv.corestmid<-rma.mv(yi=gcor,
                                V=clubSandwich::impute_covariance_matrix(esdf$g.v,esdf$study.ID,corestmid),
                                mods= ~ IVshort,
                                random=~1 | study.ID/efid,
                                slab=paste(study.ID, efid,IVshort,sep=" "),
                                data=esdf
                                )

m.combined.iv.coresthigh<-rma.mv(yi=gcor,
                                  V=clubSandwich::impute_covariance_matrix(esdf$g.v,esdf$study.ID,coresthigh),
                                  mods= ~ IVshort,
                                  random=~1 | study.ID/efid,
                                  slab=paste(study.ID, efid,IVshort,sep=" "),
                                  data=esdf
                                  )

summary(m.combined.iv)

##
## Multivariate Meta-Analysis Model (k = 120; method: REML)
##
##   logLik  Deviance      AIC      BIC     AICc

```

```

## 43.6446 -87.2892 -71.2892 -49.3996 -69.9178
##
## Variance Components:
##
##      estim  sqrt  nlvls  fixed      factor
## sigma^2.1 0.0170 0.1306   16     no      study.ID
## sigma^2.2 0.0060 0.0777  120     no  study.ID/efid
##
## Test for Residual Heterogeneity:
## QE(df = 114) = 410.5172, p-val < .0001
##
## Test of Moderators (coefficient(s) 2:6):
## QM(df = 5) = 12.8704, p-val = 0.0246
##
## Model Results:
##
##      estimate      se    zval    pval    ci.lb    ci.ub
## intrcpt          0.1913 0.0453  4.2200 <.0001  0.1024  0.2801 ***
## IVshortHollingshead 0.0212 0.0697  0.3040  0.7611 -0.1154  0.1578
## IVshortParent Ed.   0.0604 0.0372  1.6213  0.1050 -0.0126  0.1333
## IVshortPoverty      0.0595 0.0356  1.6698  0.0950 -0.0103  0.1294 .
## IVshortAssistance   0.1296 0.0383  3.3831  0.0007  0.0545  0.2046 ***
## IVshortSubjective   0.0505 0.0686  0.7365  0.4614 -0.0839  0.1849
##
## ---
## Signif. codes:  0 '***' 0.001 '**' 0.01 '*' 0.05 '.' 0.1 ' ' 1

```

```
summary(m.combined.iv.coresthgh)
```

```

##
## Multivariate Meta-Analysis Model (k = 120; method: REML)
##
##   logLik Deviance      AIC      BIC      AICc
## 45.6953 -91.3906 -75.3906 -53.5010 -74.0191
##
## Variance Components:
##
##      estim  sqrt  nlvls  fixed      factor
## sigma^2.1 0.0152 0.1234   16     no      study.ID
## sigma^2.2 0.0071 0.0843  120     no  study.ID/efid

```

```
##
## Test for Residual Heterogeneity:
## QE(df = 114) = 363.3239, p-val < .0001
##
## Test of Moderators (coefficient(s) 2:6):
## QM(df = 5) = 12.9385, p-val = 0.0240
##
## Model Results:
##
##           estimate      se    zval    pval    ci.lb    ci.ub
## intrcpt           0.1948  0.0447  4.3608 <.0001  0.1072  0.2824 ***
## IVshortHollingshead 0.0181  0.0672  0.2689  0.7880 -0.1137  0.1498
## IVshortParent Ed.   0.0526  0.0369  1.4247  0.1542 -0.0198  0.1249
## IVshortPoverty      0.0564  0.0352  1.6032  0.1089 -0.0126  0.1254
## IVshortAssistance   0.1288  0.0383  3.3590  0.0008  0.0536  0.2039 ***
## IVshortSubjective   0.0298  0.0786  0.3791  0.7046 -0.1243  0.1839
##
## ---
## Signif. codes:  0 '***' 0.001 '**' 0.01 '*' 0.05 '.' 0.1 ' ' 1
```

```
confint(m.combined.iv)
```

```
## [[1]]
##
##           estimate ci.lb ci.ub
## sigma^2.1  0.0170 0.0075 0.0428
## sigma.1    0.1306 0.0864 0.2069
##
##
## [[2]]
##
##           estimate ci.lb ci.ub
## sigma^2.2  0.0060 0.0033 0.0105
## sigma.2    0.0777 0.0573 0.1025
```

```
SESpredict<-as.data.frame(predict(m.combined.iv))
SESpredict$IV<-esdf$IV
uniqueSESpredict<-as.data.frame(SESpredict %>% group_by_all %>% count)
pander(uniqueSESpredict[order(uniqueSESpredict$pred),c(7,8,1:6)])
```

| IV                            | n  | pred | se    | ci.lb | ci.ub | cr.lb  | cr.ub |
|-------------------------------|----|------|-------|-------|-------|--------|-------|
| Family Income                 | 20 | 0.19 | 0.045 | 0.1   | 0.28  | -0.12  | 0.5   |
| Hollingshead                  | 9  | 0.21 | 0.064 | 0.087 | 0.34  | -0.11  | 0.54  |
| Subjective SES                | 3  | 0.24 | 0.072 | 0.1   | 0.38  | -0.088 | 0.57  |
| Poverty Status (poverty line) | 31 | 0.25 | 0.043 | 0.17  | 0.34  | -0.059 | 0.56  |
| Parental Ed                   | 31 | 0.25 | 0.046 | 0.16  | 0.34  | -0.059 | 0.56  |
| Receipt of Public Assistance  | 26 | 0.32 | 0.044 | 0.23  | 0.41  | 0.011  | 0.63  |

```
m.combined.iv.comptable<-comptable(list(m.combined.iv,m.combined.iv.corestlow,m.combined.iv.corestmid,m.combined.iv.coresthhigh),
                                   c("none","low","mid","high"))
pander(m.combined.iv.comptable)
```

|                            | none  | low    | mid    | high   | diff     |
|----------------------------|-------|--------|--------|--------|----------|
| <b>intrcpt</b>             | 0.19  | 0.19   | 0.19   | 0.19   | 0.0035   |
| <b>IVshortHollingshead</b> | 0.021 | 0.019  | 0.019  | 0.018  | -0.0031  |
| <b>IVshortParent Ed.</b>   | 0.06  | 0.054  | 0.055  | 0.053  | -0.0078  |
| <b>IVshortPoverty</b>      | 0.06  | 0.057  | 0.057  | 0.056  | -0.0031  |
| <b>IVshortAssistance</b>   | 0.13  | 0.13   | 0.13   | 0.13   | -0.00076 |
| <b>IVshortSubjective</b>   | 0.051 | 0.034  | 0.035  | 0.03   | -0.021   |
| <b>int.ci.l</b>            | 0.1   | 0.11   | 0.11   | 0.11   | 0.0048   |
| <b>int.ci.u</b>            | 0.28  | 0.28   | 0.28   | 0.28   | 0.0022   |
| <b>s2between</b>           | 0.017 | 0.016  | 0.016  | 0.015  | -0.0018  |
| <b>s2within</b>            | 0.006 | 0.0068 | 0.0068 | 0.0071 | 0.0011   |

Covariance estimation doesn't seem to create large differences in estimates (the maximum difference in estimate is 0.0048073, although it should be noted that these differences are not necessarily small proportionally to the (non significant) moderator coefficients).

Receipt of public assistance tends to have a particularly strong effect.

### 10.2.2 Ext/Int moderation

```
m.combined.intext<-rma.mv(yi=gcov,
                          V=g.v,
                          mods= ~ Externalizing,
                          random=~1 | study.ID/efid,
                          slab=paste(study.ID, efid,Externalizing,sep=" ")),
```



```

        data=esdf
      )

m.combined.intext.coresthhigh<-rma.mv(yi=gcor,
    V=clubSandwich::impute_covariance_matrix(esdf$g.v,esdf$study.ID,coresthhigh),
    mods= ~ Externalizing,
    random=~1 | study.ID/efid,
    slab=paste(study.ID, efid,Externalizing,sep=" "),
    data=esdf
  )

summary(m.combined.intext)

##
## Multivariate Meta-Analysis Model (k = 120; method: REML)
##
##   logLik  Deviance      AIC      BIC      AICc
##  43.9027  -87.8053  -79.8053  -68.7226  -79.4513
##
## Variance Components:
##
##           estim  sqrt  nlvls  fixed      factor
## sigma^2.1  0.0137  0.1169    16     no      study.ID
## sigma^2.2  0.0066  0.0814   120     no  study.ID/efid
##
## Test for Residual Heterogeneity:
## QE(df = 118) = 444.5743, p-val < .0001
##
## Test of Moderators (coefficient(s) 2):
## QM(df = 1) = 4.7097, p-val = 0.0300
##
## Model Results:
##
##           estimate      se    zval    pval    ci.lb    ci.ub
## intrcpt           0.2216  0.0355  6.2504 <.0001  0.1521  0.2911 ***
## ExternalizingTRUE  0.0576  0.0265  2.1702  0.0300  0.0056  0.1096  *
##
## ---
## Signif. codes:  0 '***' 0.001 '**' 0.01 '*' 0.05 '.' 0.1 ' ' 1

```

```
summary(m.combined.intext.coresthgh)
```

```
##
## Multivariate Meta-Analysis Model (k = 120; method: REML)
##
##   logLik Deviance      AIC      BIC      AICc
## 46.2105 -92.4210 -84.4210 -73.3382 -84.0670
##
## Variance Components:
##
##           estim  sqrt  nlvls  fixed      factor
## sigma^2.1 0.0105 0.1026   16    no      study.ID
## sigma^2.2 0.0078 0.0883  120    no  study.ID/efid
##
## Test for Residual Heterogeneity:
## QE(df = 118) = 390.0033, p-val < .0001
##
## Test of Moderators (coefficient(s) 2):
## QM(df = 1) = 5.4029, p-val = 0.0201
##
## Model Results:
##
##           estimate      se   zval   pval   ci.lb   ci.ub
## intrcpt           0.2153 0.0341 6.3199 <.0001 0.1485 0.2821 ***
## ExternalizingTRUE 0.0601 0.0259 2.3244 0.0201 0.0094 0.1108 *
##
## ---
## Signif. codes:  0 '***' 0.001 '**' 0.01 '*' 0.05 '.' 0.1 ' ' 1
```

```
confint(m.combined.intext)
```

```
## [[1]]
##
##           estimate ci.lb ci.ub
## sigma^2.1 0.0137 0.0057 0.0351
## sigma.1    0.1169 0.0756 0.1873
##
##
## [[2]]
```

```
##
##          estimate ci.lb ci.ub
## sigma^2.2  0.0066 0.0037 0.0113
## sigma.2    0.0814 0.0608 0.1062
```

```
predict(m.combined.intext.coresthhigh)[c(1,2),]
```

```
##          pred      se ci.lb ci.ub  cr.lb cr.ub
## CDP 1 TRUE  0.2754 0.0349 0.2071 0.3437  0.0015 0.5493
## CDP 2 FALSE 0.2153 0.0341 0.1485 0.2821 -0.0582 0.4889
```

We see a small moderation such that externalizing effects are stronger.

### 10.2.3 Age moderation

```
m.combined.age<-rma.mv(yi=gcor,
                      V=g.v,
                      mods= ~ ageMean.c ,
                      random=~1 | study.ID/efid,
                      slab=paste(study.ID, efid,ageMean,sep=" "),
                      data=esdf
                      )

m.combined.age.coresthhigh<-rma.mv(yi=gcor,
                                   V=clubSandwich::impute_covariance_matrix(esdf$g.v,esdf$study.ID,coresthhigh),
                                   mods= ~ ageMean.c ,
                                   random=~1 | study.ID/efid,
                                   slab=paste(study.ID, efid,ageMean,sep=" "),
                                   data=esdf
                                   )

summary(m.combined.age)
```

```
##
## Multivariate Meta-Analysis Model (k = 120; method: REML)
##
##   logLik Deviance      AIC      BIC      AICc
## 42.1350 -84.2700 -76.2700 -65.1872 -75.9160
##
## Variance Components:
```

```

##
##          estim  sqrt  nlvls  fixed      factor
## sigma^2.1  0.0160  0.1265    16     no      study.ID
## sigma^2.2  0.0069  0.0834   120     no  study.ID/efid
##
## Test for Residual Heterogeneity:
## QE(df = 118) = 466.4031, p-val < .0001
##
## Test of Moderators (coefficient(s) 2):
## QM(df = 1) = 0.1352, p-val = 0.7131
##
## Model Results:
##
##          estimate      se      zval      pval      ci.lb      ci.ub
## intrcpt      0.2476  0.0357   6.9317 <.0001   0.1776  0.3176 ***
## ageMean.c   -0.0024  0.0066  -0.3677  0.7131  -0.0153  0.0105
##
## ---
## Signif. codes:  0 '***' 0.001 '**' 0.01 '*' 0.05 '.' 0.1 ' ' 1

```

```
summary(m.combined.age.coresthigh)
```

```

##
## Multivariate Meta-Analysis Model (k = 120; method: REML)
##
##   logLik Deviance      AIC      BIC      AICc
##  44.1912 -88.3824 -80.3824 -69.2996 -80.0284
##
## Variance Components:
##
##          estim  sqrt  nlvls  fixed      factor
## sigma^2.1  0.0130  0.1141    16     no      study.ID
## sigma^2.2  0.0082  0.0905   120     no  study.ID/efid
##
## Test for Residual Heterogeneity:
## QE(df = 118) = 401.8885, p-val < .0001
##
## Test of Moderators (coefficient(s) 2):
## QM(df = 1) = 0.2049, p-val = 0.6508
##

```

```
## Model Results:
##
##           estimate      se      zval      pval      ci.lb      ci.ub
## intrcpt      0.2419  0.0348   6.9536 <.0001   0.1737  0.3101 ***
## ageMean.c   -0.0030  0.0066  -0.4527  0.6508  -0.0159  0.0099
##
## ---
## Signif. codes:  0 '***' 0.001 '**' 0.01 '*' 0.05 '.' 0.1 ' ' 1
```

Not significant (NS).

#### 10.2.4 Gender Moderation

```
m.combined.sex<-rma.mv(yi=gcov,
                      V=g.v,
                      mods= ~ femalePerc ,
                      random=~1 | study.ID/efid,
                      slab=paste(study.ID, efid,femalePerc,sep=" "),
                      data=esdf
                      )

m.combined.sex.coresthhigh<-rma.mv(yi=gcov,
                                   V=clubSandwich::impute_covariance_matrix(esdf$g.v,esdf$study.ID,coresthhigh),
                                   mods= ~ femalePerc ,
                                   random=~1 | study.ID/efid,
                                   slab=paste(study.ID, efid,femalePerc,sep=" "),
                                   data=esdf
                                   )

summary(m.combined.sex)
```

```
##
## Multivariate Meta-Analysis Model (k = 120; method: REML)
##
##   logLik  Deviance      AIC      BIC      AICc
##  42.3584  -84.7167  -76.7167  -65.6340  -76.3627
##
## Variance Components:
##
```

```

##          estim  sqrt  nlvls  fixed      factor
## sigma^2.1 0.0170 0.1304   16     no      study.ID
## sigma^2.2 0.0068 0.0826  120     no  study.ID/efid
##
## Test for Residual Heterogeneity:
## QE(df = 118) = 495.2552, p-val < .0001
##
## Test of Moderators (coefficient(s) 2):
## QM(df = 1) = 0.1397, p-val = 0.7086
##
## Model Results:
##
##          estimate      se      zval      pval      ci.lb      ci.ub
## intrcpt          0.2725  0.0719   3.7886  0.0002   0.1315   0.4134 ***
## femalePerc      -0.0549  0.1468  -0.3737  0.7086  -0.3425   0.2328
##
## ---
## Signif. codes:  0 '***' 0.001 '**' 0.01 '*' 0.05 '.' 0.1 ' ' 1

```

```
summary(m.combined.sex.coresthigh)
```

```

##
## Multivariate Meta-Analysis Model (k = 120; method: REML)
##
##   logLik  Deviance      AIC      BIC      AICc
## 44.3569 -88.7139 -80.7139 -69.6311 -80.3599
##
## Variance Components:
##
##          estim  sqrt  nlvls  fixed      factor
## sigma^2.1 0.0141 0.1189   16     no      study.ID
## sigma^2.2 0.0081 0.0898  120     no  study.ID/efid
##
## Test for Residual Heterogeneity:
## QE(df = 118) = 422.0661, p-val < .0001
##
## Test of Moderators (coefficient(s) 2):
## QM(df = 1) = 0.0993, p-val = 0.7526
##
## Model Results:

```

```
##
##          estimate      se      zval      pval      ci.lb      ci.ub
## intrcpt          0.2643  0.0729   3.6248  0.0003   0.1214   0.4073  ***
## femalePerc      -0.0462  0.1467  -0.3152  0.7526  -0.3337   0.2413
##
## ---
## Signif. codes:  0 '***' 0.001 '**' 0.01 '*' 0.05 '.' 0.1 ' ' 1
```

NS

### 10.2.5 % Racial Majority / White

```
m.combined.race<-rma.mv(yi=gcpr,
                        V=g.v,
                        mods= ~ whitePerc.c ,
                        random=~1 | study.ID/efid,
                        slab=paste(study.ID, efid,whitePerc,sep=" "),
                        data=esdf
                        )

m.combined.race.coresthgh<-rma.mv(yi=gcpr,
                                  V=clubSandwich::impute_covariance_matrix(esdf$g.v,esdf$study.ID,coresthgh),
                                  mods= ~ whitePerc.c ,
                                  random=~1 | study.ID/efid,
                                  slab=paste(study.ID, efid,whitePerc,sep=" "),
                                  data=esdf
                                  )

summary(m.combined.race)
```

```
##
## Multivariate Meta-Analysis Model (k = 120; method: REML)
##
##   logLik  Deviance      AIC      BIC      AICc
##  42.7129  -85.4258  -77.4258  -66.3430  -77.0718
##
## Variance Components:
##
##           estim      sqrt  nlvls  fixed      factor
```

```

## sigma^2.1  0.0171  0.1309    16    no    study.ID
## sigma^2.2  0.0068  0.0826   120    no  study.ID/efid
##
## Test for Residual Heterogeneity:
## QE(df = 118) = 495.4283, p-val < .0001
##
## Test of Moderators (coefficient(s) 2):
## QM(df = 1) = 0.0871, p-val = 0.7679
##
## Model Results:
##
##           estimate      se   zval   pval   ci.lb  ci.ub
## intrcpt          0.2462  0.0379  6.5031 <.0001  0.1720  0.3204 ***
## whitePerc.c      0.0511  0.1731  0.2951  0.7679 -0.2882  0.3904
##
## ---
## Signif. codes:  0 '***' 0.001 '**' 0.01 '*' 0.05 '.' 0.1 ' ' 1

```

```
summary(m.combined.race.coresthhigh)
```

```

##
## Multivariate Meta-Analysis Model (k = 120; method: REML)
##
##   logLik Deviance      AIC      BIC      AICc
##  44.6657 -89.3313 -81.3313 -70.2486 -80.9773
##
## Variance Components:
##
##           estim   sqrt  nlvls  fixed      factor
## sigma^2.1  0.0143  0.1198    16    no    study.ID
## sigma^2.2  0.0081  0.0898   120    no  study.ID/efid
##
## Test for Residual Heterogeneity:
## QE(df = 118) = 416.4074, p-val < .0001
##
## Test of Moderators (coefficient(s) 2):
## QM(df = 1) = 0.0164, p-val = 0.8980
##
## Model Results:
##

```



```
##           estimate      se   zval   pval   ci.lb   ci.ub
## intrcpt      0.2431  0.0370  6.5659 <.0001  0.1705  0.3156 ***
## whitePerc.c  0.0216  0.1682  0.1282  0.8980 -0.3080  0.3511
##
## ---
## Signif. codes:  0 '***' 0.001 '**' 0.01 '*' 0.05 '.' 0.1 ' ' 1
```

NS

### 10.2.6 % African American / Black

```
m.combined.race2<-rma.mv(yi=gcor,
                        V=g.v,
                        mods= ~ blackPerc.c ,
                        random=~1 | study.ID/efid,
                        slab=paste(study.ID, efid,blackPerc,sep=" "),
                        data=esdf
                        )

m.combined.race2.coresthhigh<-rma.mv(yi=gcor,
                                     V=clubSandwich::impute_covariance_matrix(esdf$g.v,esdf$study.ID,coresthhigh),
                                     mods= ~ blackPerc.c ,
                                     random=~1 | study.ID/efid,
                                     slab=paste(study.ID, efid,blackPerc,sep=" "),
                                     data=esdf
                                     )

summary(m.combined.race2)
```

```
##
## Multivariate Meta-Analysis Model (k = 120; method: REML)
##
##   logLik  Deviance      AIC      BIC      AICc
##  42.7129  -85.4258  -77.4258  -66.3430  -77.0718
##
## Variance Components:
##
##           estim  sqrt  nlvls  fixed      factor
## sigma^2.1  0.0171  0.1309    16     no      study.ID
```

```

## sigma^2.2 0.0068 0.0826 120 no study.ID/efid
##
## Test for Residual Heterogeneity:
## QE(df = 118) = 495.4283, p-val < .0001
##
## Test of Moderators (coefficient(s) 2):
## QM(df = 1) = 0.0871, p-val = 0.7679
##
## Model Results:
##
##          estimate      se   zval   pval   ci.lb  ci.ub
## intrcpt      0.2462 0.0379 6.5031 <.0001 0.1720 0.3204 ***
## blackPerc.c 0.0511 0.1731 0.2951 0.7679 -0.2882 0.3904
##
## ---
## Signif. codes:  0 '***' 0.001 '**' 0.01 '*' 0.05 '.' 0.1 ' ' 1

```

```
summary(m.combined.race2.coresthgh)
```

```

##
## Multivariate Meta-Analysis Model (k = 120; method: REML)
##
##   logLik Deviance      AIC      BIC      AICc
## 44.6657 -89.3313 -81.3313 -70.2486 -80.9773
##
## Variance Components:
##
##      estim  sqrt  nlvls  fixed      factor
## sigma^2.1 0.0143 0.1198   16    no      study.ID
## sigma^2.2 0.0081 0.0898  120    no  study.ID/efid
##
## Test for Residual Heterogeneity:
## QE(df = 118) = 416.4074, p-val < .0001
##
## Test of Moderators (coefficient(s) 2):
## QM(df = 1) = 0.0164, p-val = 0.8980
##
## Model Results:
##
##          estimate      se   zval   pval   ci.lb  ci.ub

```

```
## intrcpt      0.2431  0.0370  6.5659 <.0001  0.1705  0.3156 ***
## blackPerc.c  0.0216  0.1682  0.1282  0.8980 -0.3080  0.3511
##
## ---
## Signif. codes:  0 '***' 0.001 '**' 0.01 '*' 0.05 '.' 0.1 ' ' 1
```

NS

### 10.2.7 Adjustment Moderation

```
m.combined.adj<-rma.mv(yi=gcor,
                      V=g.v,
                      mods= ~ adjusted ,
                      random=~1 | study.ID/efid,
                      slab=paste(study.ID, efid,"adj",adjusted,sep=" "),
                      data=esdf
                      )

m.combined.adj.coresthhigh<-rma.mv(yi=gcor,
                                   V=clubSandwich::impute_covariance_matrix(esdf$g.v,esdf$study.ID,coresthhigh),
                                   mods= ~ adjusted ,
                                   random=~1 | study.ID/efid,
                                   slab=paste(study.ID, efid,"adj",adjusted,sep=" "),
                                   data=esdf
                                   )

summary(m.combined.adj)
```

```
##
## Multivariate Meta-Analysis Model (k = 120; method: REML)
##
##   logLik  Deviance      AIC      BIC      AICc
##  42.0742  -84.1484  -76.1484  -65.0657  -75.7944
##
## Variance Components:
##
##           estim  sqrt  nlvls  fixed      factor
## sigma^2.1  0.0173  0.1317   16     no      study.ID
## sigma^2.2  0.0067  0.0818  120     no      study.ID/efid
```

```

##
## Test for Residual Heterogeneity:
## QE(df = 118) = 497.1445, p-val < .0001
##
## Test of Moderators (coefficient(s) 2):
## QM(df = 1) = 0.4577, p-val = 0.4987
##
## Model Results:
##
##           estimate      se    zval    pval    ci.lb    ci.ub
## intrcpt          0.2433  0.0376  6.4637 <.0001  0.1695  0.3171 ***
## adjustedTRUE    0.0341  0.0504  0.6765  0.4987 -0.0647  0.1329
##
## ---
## Signif. codes:  0 '***' 0.001 '**' 0.01 '*' 0.05 '.' 0.1 ' ' 1

```

```
summary(m.combined.adj.coresthhigh)
```

```

##
## Multivariate Meta-Analysis Model (k = 120; method: REML)
##
##   logLik Deviance      AIC      BIC      AICc
##  44.0907 -88.1813 -80.1813 -69.0986 -79.8273
##
## Variance Components:
##
##           estim    sqrt  nlvls  fixed      factor
## sigma^2.1  0.0145  0.1204    16    no      study.ID
## sigma^2.2  0.0079  0.0890   120    no  study.ID/efid
##
## Test for Residual Heterogeneity:
## QE(df = 118) = 416.6634, p-val < .0001
##
## Test of Moderators (coefficient(s) 2):
## QM(df = 1) = 0.4583, p-val = 0.4984
##
## Model Results:
##
##           estimate      se    zval    pval    ci.lb    ci.ub
## intrcpt          0.2382  0.0369  6.4507 <.0001  0.1658  0.3105 ***

```

```
## adjustedTRUE    0.0340  0.0503  0.6770  0.4984  -0.0645  0.1326
##
## ---
## Signif. codes:  0 '***' 0.001 '**' 0.01 '*' 0.05 '.' 0.1 ' ' 1

NS
```

### 10.2.8 Weighting Moderation

```
m.combined.weight<-rma.mv(yi=gcor,
                          V=g.v,
                          mods= ~ weighted ,
                          random=~1 | study.ID/efid,
                          slab=paste(study.ID, efid,"weight",weighted,sep=" "),
                          data=esdf
                          )

m.combined.weight.coresthhigh<-rma.mv(yi=gcor,
                                       V=clubSandwich::impute_covariance_matrix(esdf$g.v,esdf$study.ID,coresthhigh),
                                       mods= ~ weighted ,
                                       random=~1 | study.ID/efid,
                                       slab=paste(study.ID, efid,"weight",weighted,sep=" "),
                                       data=esdf
                                       )

summary(m.combined.weight)

##
## Multivariate Meta-Analysis Model (k = 120; method: REML)
##
##   logLik  Deviance      AIC      BIC      AICc
##  43.3151  -86.6302  -78.6302  -67.5475  -78.2763
##
## Variance Components:
##
##           estim  sqrt  nlvls  fixed      factor
## sigma^2.1  0.0150  0.1223   16     no      study.ID
## sigma^2.2  0.0068  0.0827  120     no      study.ID/efid
##
```

```

## Test for Residual Heterogeneity:
## QE(df = 118) = 430.0566, p-val < .0001
##
## Test of Moderators (coefficient(s) 2):
## QM(df = 1) = 1.4181, p-val = 0.2337
##
## Model Results:
##
##           estimate      se      zval      pval      ci.lb      ci.ub
## intrcpt          0.3077  0.0602   5.1131 <.0001   0.1897   0.4256 ***
## weightedTRUE    -0.0874  0.0734  -1.1909  0.2337  -0.2313   0.0565
##
## ---
## Signif. codes:  0 '***' 0.001 '**' 0.01 '*' 0.05 '.' 0.1 ' ' 1

```

```
summary(m.combined.weight.coresthgh)
```

```

##
## Multivariate Meta-Analysis Model (k = 120; method: REML)
##
##   logLik Deviance      AIC      BIC      AICc
## 45.2030 -90.4061 -82.4061 -71.3233 -82.0521
##
## Variance Components:
##
##           estim      sqrt  nlvls  fixed      factor
## sigma^2.1  0.0124  0.1116    16    no      study.ID
## sigma^2.2  0.0081  0.0900   120    no  study.ID/efid
##
## Test for Residual Heterogeneity:
## QE(df = 118) = 401.6178, p-val < .0001
##
## Test of Moderators (coefficient(s) 2):
## QM(df = 1) = 1.1704, p-val = 0.2793
##
## Model Results:
##
##           estimate      se      zval      pval      ci.lb      ci.ub
## intrcpt          0.2967  0.0595   4.9825 <.0001   0.1800   0.4134 ***
## weightedTRUE    -0.0784  0.0724  -1.0818  0.2793  -0.2204   0.0636

```

```
##
## ---
## Signif. codes:  0 '***' 0.001 '**' 0.01 '*' 0.05 '.' 0.1 ' ' 1
```

### 10.2.9 Reporter Moderation

```
m.combined.rep<-rma.mv(yi=gcor,
                      V=g.v,
                      mods= ~ measure ,
                      random=~1 | study.ID/efid,
                      slab=paste(study.ID, efid,"measure",measure,sep=" "),
                      data=esdf
                      )

m.combined.rep.coresthhigh<-rma.mv(yi=gcor,
                                   V=clubSandwich::impute_covariance_matrix(esdf$g.v,esdf$study.ID,coresthhigh),
                                   mods= ~ measure ,
                                   random=~1 | study.ID/efid,
                                   slab=paste(study.ID, efid,"measure",measure,sep=" "),
                                   data=esdf
                                   )

summary(m.combined.rep)
```

```
##
## Multivariate Meta-Analysis Model (k = 120; method: REML)
##
##   logLik  Deviance      AIC      BIC      AICc
##  44.4122  -88.8245  -72.8245  -50.9349  -71.4531
##
## Variance Components:
##
##           estim  sqrt  nlvls  fixed      factor
## sigma^2.1  0.0146  0.1206   16    no      study.ID
## sigma^2.2  0.0062  0.0788  120    no  study.ID/efid
##
## Test for Residual Heterogeneity:
## QE(df = 114) = 422.8100, p-val < .0001
##
```

```

## Test of Moderators (coefficient(s) 2:6):
## QM(df = 5) = 9.3778, p-val = 0.0949
##
## Model Results:
##
##           estimate      se      zval      pval      ci.lb      ci.ub
## intrcpt           0.3747  0.1792   2.0915  0.0365   0.0236  0.7259 *
## measureChild Form  -0.2801  0.1890  -1.4821  0.1383  -0.6505  0.0903
## measureCombined    -0.0706  0.1825  -0.3868  0.6989  -0.4283  0.2871
## measureParent Form -0.1433  0.1857  -0.7720  0.4401  -0.5072  0.2206
## measureParent Interview -0.0678  0.1801  -0.3765  0.7065  -0.4208  0.2852
## measureTeacher Form -0.0169  0.2314  -0.0732  0.9416  -0.4706  0.4367
##
## ---
## Signif. codes:  0 '***' 0.001 '**' 0.01 '*' 0.05 '.' 0.1 ' ' 1

```

```
summary(m.combined.rep.coresthigh)
```

```

##
## Multivariate Meta-Analysis Model (k = 120; method: REML)
##
##   logLik Deviance      AIC      BIC      AICc
##  46.4252 -92.8504 -76.8504 -54.9608 -75.4790
##
## Variance Components:
##
##           estim      sqrt  nlvls  fixed      factor
## sigma^2.1  0.0121  0.1100    16     no      study.ID
## sigma^2.2  0.0074  0.0861   120     no  study.ID/efid
##
## Test for Residual Heterogeneity:
## QE(df = 114) = 363.3461, p-val < .0001
##
## Test of Moderators (coefficient(s) 2:6):
## QM(df = 5) = 9.4632, p-val = 0.0920
##
## Model Results:
##
##           estimate      se      zval      pval      ci.lb      ci.ub
## intrcpt           0.3937  0.1720   2.2892  0.0221   0.0566  0.7307 *

```



```
## measureChild Form      -0.3016  0.1819  -1.6585  0.0972  -0.6581  0.0548  .
## measureCombined       -0.0939  0.1737  -0.5408  0.5886  -0.4343  0.2465
## measureParent Form    -0.1646  0.1781  -0.9242  0.3554  -0.5135  0.1844
## measureParent Interview -0.0899  0.1735  -0.5180  0.6045  -0.4299  0.2502
## measureTeacher Form   -0.0362  0.2242  -0.1614  0.8718  -0.4756  0.4032
##
## ---
## Signif. codes:  0 '***' 0.001 '**' 0.01 '*' 0.05 '.' 0.1 ' ' 1
```

NS

### 10.2.10 Poverty Focus

```
m.combined.pfoc<-rma.mv(yi=gcor,
                        V=g.v,
                        mods= ~ povFocus ,
                        random=~1 | study.ID/efid,
                        slab=paste(study.ID, efid,povFocus,sep=" "),
                        data=esdf
                        )

m.combined.pfoc.coresthhigh<-rma.mv(yi=gcor,
                                    V=clubSandwich::impute_covariance_matrix(esdf$g.v,esdf$study.ID,coresthhigh),
                                    mods= ~ povFocus ,
                                    random=~1 | study.ID/efid,
                                    slab=paste(study.ID, efid,povFocus,sep=" "),
                                    data=esdf
                                    )

summary(m.combined.pfoc)
```

```
##
## Multivariate Meta-Analysis Model (k = 120; method: REML)
##
##   logLik  Deviance      AIC      BIC      AICc
##  43.2449  -86.4899  -78.4899  -67.4071  -78.1359
##
## Variance Components:
##
```

```

##          estim  sqrt  nlvls  fixed      factor
## sigma^2.1 0.0186 0.1365    16     no      study.ID
## sigma^2.2 0.0062 0.0789   120     no  study.ID/efid
##
## Test for Residual Heterogeneity:
## QE(df = 118) = 463.8916, p-val < .0001
##
## Test of Moderators (coefficient(s) 2):
## QM(df = 1) = 2.7549, p-val = 0.0970
##
## Model Results:
##
##          estimate      se    zval    pval    ci.lb  ci.ub
## intrcpt          0.2383 0.0382  6.2369 <.0001  0.1634 0.3131 ***
## povFocusTRUE     0.0896 0.0540  1.6598 0.0970 -0.0162 0.1953 .
##
## ---
## Signif. codes:  0 '***' 0.001 '**' 0.01 '*' 0.05 '.' 0.1 ' ' 1

```

```
summary(m.combined.pfoc.coresthgh)
```

```

##
## Multivariate Meta-Analysis Model (k = 120; method: REML)
##
##   logLik Deviance      AIC      BIC      AICc
## 45.1051 -90.2101 -82.2101 -71.1274 -81.8561
##
## Variance Components:
##
##          estim  sqrt  nlvls  fixed      factor
## sigma^2.1 0.0158 0.1259    16     no      study.ID
## sigma^2.2 0.0075 0.0866   120     no  study.ID/efid
##
## Test for Residual Heterogeneity:
## QE(df = 118) = 420.6052, p-val < .0001
##
## Test of Moderators (coefficient(s) 2):
## QM(df = 1) = 2.4471, p-val = 0.1177
##
## Model Results:

```

```
##
##           estimate      se    zval    pval    ci.lb    ci.ub
## intrcpt          0.2330  0.0376  6.1920 <.0001  0.1592  0.3067 ***
## povFocusTRUE    0.0838  0.0535  1.5643  0.1177 -0.0212  0.1887
##
## ---
## Signif. codes:  0 '***' 0.001 '**' 0.01 '*' 0.05 '.' 0.1 ' ' 1
```

NS

### 10.2.11 Study Date

```
m.combined.date<-rma.mv(yi=gcov,
                        V=g.v,
                        mods= ~ date.c ,
                        random=~1 | study.ID/efid,
                        slab=paste(study.ID, efid,povFocus,sep=" "),
                        data=esdf
                        )

m.combined.date.coresthhigh<-rma.mv(yi=gcov,
                                    V=clubSandwich::impute_covariance_matrix(esdf$g.v,esdf$study.ID,coresthhigh),
                                    mods= ~ date.c ,
                                    random=~1 | study.ID/efid,
                                    slab=paste(study.ID, efid,povFocus,sep=" "),
                                    data=esdf
                                    )

summary(m.combined.date)
```

```
##
## Multivariate Meta-Analysis Model (k = 120; method: REML)
##
##   logLik  Deviance      AIC      BIC      AICc
##  43.8336  -87.6673  -79.6673  -68.5846  -79.3133
##
## Variance Components:
##
##           estim  sqrt  nlvls  fixed      factor
```

```

## sigma^2.1 0.0122 0.1105 16 no study.ID
## sigma^2.2 0.0071 0.0842 120 no study.ID/efid
##
## Test for Residual Heterogeneity:
## QE(df = 118) = 441.9684, p-val < .0001
##
## Test of Moderators (coefficient(s) 2):
## QM(df = 1) = 3.1208, p-val = 0.0773
##
## Model Results:
##
## estimate se zval pval ci.lb ci.ub
## intrcpt 0.2575 0.0322 7.9847 <.0001 0.1943 0.3207 ***
## date.c -0.0062 0.0035 -1.7666 0.0773 -0.0132 0.0007 .
##
## ---
## Signif. codes: 0 '***' 0.001 '**' 0.01 '*' 0.05 '.' 0.1 ' ' 1

```

```
summary(m.combined.pfoc.coresthhigh)
```

```

##
## Multivariate Meta-Analysis Model (k = 120; method: REML)
##
## logLik Deviance AIC BIC AICc
## 45.1051 -90.2101 -82.2101 -71.1274 -81.8561
##
## Variance Components:
##
## estim sqrt nlvls fixed factor
## sigma^2.1 0.0158 0.1259 16 no study.ID
## sigma^2.2 0.0075 0.0866 120 no study.ID/efid
##
## Test for Residual Heterogeneity:
## QE(df = 118) = 420.6052, p-val < .0001
##
## Test of Moderators (coefficient(s) 2):
## QM(df = 1) = 2.4471, p-val = 0.1177
##
## Model Results:
##

```

```
##           estimate      se    zval    pval    ci.lb    ci.ub
## intrcpt      0.2330  0.0376  6.1920 <.0001  0.1592  0.3067 ***
## povFocusTRUE 0.0838  0.0535  1.5643  0.1177 -0.0212  0.1887
##
## ---
## Signif. codes:  0 '***' 0.001 '**' 0.01 '*' 0.05 '.' 0.1 ' ' 1
```

NS

### 10.3 Further Model Building

Does adding the moderators actually improve model fit? This addresses overfitting. We will need to specify a model with ML, as REML (although less biased) does not allow for these comparisons.

```
m.ml.combined<-rma.mv(yi=gcor,
                      V=g.v,
                      method="ML",
                      random=~1 | study.ID/efid,
                      slab=paste(study.ID, efid,IVshort,sep=" "),
                      data=esdf,
                      intercept=TRUE
                      )

m.ml.combined.iv<-rma.mv(yi=gcor,
                        V=g.v,
                        mods= ~ IVshort,
                        method="ML",
                        random=~1 | study.ID/efid,
                        slab=paste(study.ID, efid,IVshort,sep=" "),
                        data=esdf,
                        intercept=TRUE
                        )

m.ml.combined.intext<-rma.mv(yi=gcor,
                             V=g.v,
                             mods= ~ Externalizing,
                             method="ML",
                             random=~1 | study.ID/efid,
                             slab=paste(study.ID, efid,IVshort,sep=" "),
                             data=esdf,
```

```

        intercept=TRUE
    )

m.ml.combined.intext.IV<-rma.mv(yi=gcor,
    V=g.v,
    mods= ~ IVshort+Externalizing,
    method="ML",
    random=~1 | study.ID/efid,
    slab=paste(study.ID, efid,Externalizing,sep=" "),
    data=esdf
)

m.ml.combined.intext.IVint<-rma.mv(yi=gcor,
    V=g.v,
    mods= ~ IVshort*Externalizing,
    method="ML",
    random=~1 | study.ID/efid,
    slab=paste(study.ID, efid,Externalizing,sep=" "),
    data=esdf
)

m.ml.combined.intext.IVint<-rma.mv(yi=gcor,
    V=g.v,
    mods= ~ IVshort*Externalizing,
    method="ML",
    random=~1 | study.ID/efid,
    slab=paste(study.ID, efid,Externalizing,sep=" "),
    data=esdf
)

anova(m.ml.combined,m.ml.combined.intext.IV)

##          df      AIC      BIC      AICc  logLik      LRT  pval      QE
## Full      9 -85.0101 -59.9227 -83.3738  51.5051          367.6400
## Reduced   3 -79.3427 -70.9803 -79.1358  42.6714  17.6674  0.0071  497.1743

```

```
anova(m.ml.combined,m.ml.combined.intext.IVint)
```

```
##          df      AIC      BIC      AICc logLik      LRT  pval      QE
## Full     14 -86.8365 -47.8116 -82.8365 57.4182          334.7176
## Reduced   3 -79.3427 -70.9803 -79.1358 42.6714 29.4937 0.0019 497.1743
```

```
anova(m.ml.combined.intext.IVint,m.ml.combined.intext.IV)
```

```
##          df      AIC      BIC      AICc logLik      LRT  pval      QE
## Full     14 -86.8365 -47.8116 -82.8365 57.4182          334.7176
## Reduced   9 -85.0101 -59.9227 -83.3738 51.5051 11.8263 0.0372 367.6400
```

```
intcellcounts<-gmodels::CrossTable(esdf$IVshort,esdf$Externalizing)
```

```
##
```

```
##
```

```
## Cell Contents
```

```
## |-----|
## |                               N |
## | Chi-square contribution |
## |           N / Row Total |
## |           N / Col Total |
## |           N / Table Total |
## |-----|
```

```
##
```

```
##
```

```
## Total Observations in Table: 120
```

```
##
```

```
##
```

```
##          | esdf$Externalizing
## esdf$IVshort | FALSE | TRUE | Row Total |
## -----|-----|-----|-----|
##      Income |      12 |      8 |      20 |
##              | 0.167 | 0.190 |          |
##              | 0.600 | 0.400 | 0.167 |
##              | 0.188 | 0.143 |          |
##              | 0.100 | 0.067 |          |
## -----|-----|-----|-----|
## Hollingshead |      4 |      5 |      9 |
##              | 0.133 | 0.152 |          |
```

|    |              |       |       |       |
|----|--------------|-------|-------|-------|
| ## |              | 0.444 | 0.556 | 0.075 |
| ## |              | 0.062 | 0.089 |       |
| ## |              | 0.033 | 0.042 |       |
| ## | -----        | ----- | ----- | ----- |
| ## | Parent Ed.   | 17    | 14    | 31    |
| ## |              | 0.013 | 0.015 |       |
| ## |              | 0.548 | 0.452 | 0.258 |
| ## |              | 0.266 | 0.250 |       |
| ## |              | 0.142 | 0.117 |       |
| ## | -----        | ----- | ----- | ----- |
| ## | Poverty      | 16    | 15    | 31    |
| ## |              | 0.017 | 0.020 |       |
| ## |              | 0.516 | 0.484 | 0.258 |
| ## |              | 0.250 | 0.268 |       |
| ## |              | 0.133 | 0.125 |       |
| ## | -----        | ----- | ----- | ----- |
| ## | Assistance   | 13    | 13    | 26    |
| ## |              | 0.054 | 0.062 |       |
| ## |              | 0.500 | 0.500 | 0.217 |
| ## |              | 0.203 | 0.232 |       |
| ## |              | 0.108 | 0.108 |       |
| ## | -----        | ----- | ----- | ----- |
| ## | Subjective   | 2     | 1     | 3     |
| ## |              | 0.100 | 0.114 |       |
| ## |              | 0.667 | 0.333 | 0.025 |
| ## |              | 0.031 | 0.018 |       |
| ## |              | 0.017 | 0.008 |       |
| ## | -----        | ----- | ----- | ----- |
| ## | Column Total | 64    | 56    | 120   |
| ## |              | 0.533 | 0.467 |       |
| ## | -----        | ----- | ----- | ----- |
| ## |              |       |       |       |
| ## |              |       |       |       |

The 2 moderator (Full) model has a lower (more negative) AIC and high log likelihood, with a sig. wald test vs the un-moderated, omnibus model. The interaction (full) model has about the same AIC (worse AICc and BIC) and a significant likelihood test with respect to the 2 moderator model. The cell counts in the interaction model are rather small (TRUE = Externalizing):



|                     | FALSE | TRUE |
|---------------------|-------|------|
| <b>Income</b>       | 12    | 8    |
| <b>Hollingshead</b> | 4     | 5    |
| <b>Parent Ed.</b>   | 17    | 14   |
| <b>Poverty</b>      | 16    | 15   |
| <b>Assistance</b>   | 13    | 13   |
| <b>Subjective</b>   | 2     | 1    |

A model incorporating both SES Measure and internalizing describes the data better than the un-moderated model. It's somewhat ambiguous whether an interaction model is superior to a model which merely models both moderators. We will go with the more parsimonious two moderator model. For interested readers, a summary of the interaction model is presented under the 'Supplemental Analyses' section at the end of the document.

### 10.3.1 Final Model

```
m.combined.intext.IV<-rma.mv(yi=gcor,
  V=g.v,
  mods= ~ IVshort+Externalizing,
  random=~1 | study.ID/efid,
  slab=paste(study.ID, efid,Externalizing,sep=" "),
  data=esdf
)

m.combined.intext.IV.coresthhigh<-rma.mv(yi=gcor,
  V=clubSandwich::impute_covariance_matrix(esdf$g.v,esdf$study.ID,coresthhigh),
  mods= ~ IVshort+Externalizing,
  random=~1 | study.ID/efid,
  slab=paste(study.ID, efid,Externalizing,sep=" "),
  data=esdf
)

summary(m.combined.intext.IV)

##
## Multivariate Meta-Analysis Model (k = 120; method: REML)
##
##   logLik  Deviance      AIC      BIC      AICc
## 44.8946 -89.7892 -71.7892 -47.2427 -70.0416
##
```

```

## Variance Components:
##
##      estim  sqrt  nlvls  fixed      factor
## sigma^2.1 0.0151 0.1228   16     no      study.ID
## sigma^2.2 0.0058 0.0761  120     no  study.ID/efid
##
## Test for Residual Heterogeneity:
## QE(df = 113) = 367.6400, p-val < .0001
##
## Test of Moderators (coefficient(s) 2:7):
## QM(df = 6) = 17.7472, p-val = 0.0069
##
## Model Results:
##
##      estimate      se    zval    pval    ci.lb    ci.ub
## intrcpt          0.1649 0.0452  3.6518 0.0003  0.0764 0.2534 ***
## IVshortHollingshead 0.0217 0.0683  0.3171 0.7512 -0.1122 0.1556
## IVshortParent Ed.   0.0628 0.0368  1.7061 0.0880 -0.0093 0.1350 .
## IVshortPoverty      0.0579 0.0352  1.6461 0.0998 -0.0111 0.1269 .
## IVshortAssistance   0.1286 0.0378  3.4015 0.0007  0.0545 0.2027 ***
## IVshortSubjective   0.0486 0.0675  0.7209 0.4710 -0.0836 0.1809
## ExternalizingTRUE   0.0558 0.0258  2.1668 0.0302  0.0053 0.1063 *
##
## ---
## Signif. codes:  0 '***' 0.001 '**' 0.01 '*' 0.05 '.' 0.1 ' ' 1

```

```
summary(m.combined.intext.IV.coresthgh)
```

```

##
## Multivariate Meta-Analysis Model (k = 120; method: REML)
##
##   logLik Deviance      AIC      BIC      AICc
## 47.1795 -94.3591 -76.3591 -51.8126 -74.6115
##
## Variance Components:
##
##      estim  sqrt  nlvls  fixed      factor
## sigma^2.1 0.0130 0.1142   16     no      study.ID
## sigma^2.2 0.0068 0.0823  120     no  study.ID/efid
##

```

```

## Test for Residual Heterogeneity:
## QE(df = 113) = 331.5183, p-val < .0001
##
## Test of Moderators (coefficient(s) 2:7):
## QM(df = 6) = 18.4022, p-val = 0.0053
##
## Model Results:
##
##           estimate      se    zval    pval    ci.lb    ci.ub
## intrcpt           0.1685  0.0441  3.8253  0.0001   0.0822  0.2549 ***
## IVshortHollingshead 0.0179  0.0656  0.2721  0.7855  -0.1108  0.1465
## IVshortParent Ed.   0.0544  0.0364  1.4960  0.1347  -0.0169  0.1256
## IVshortPoverty      0.0548  0.0346  1.5822  0.1136  -0.0131  0.1226
## IVshortAssistance   0.1273  0.0377  3.3761  0.0007   0.0534  0.2011 ***
## IVshortSubjective   0.0253  0.0769  0.3294  0.7418  -0.1254  0.1760
## ExternalizingTRUE   0.0573  0.0250  2.2940  0.0218   0.0083  0.1062  *
##
## ---
## Signif. codes:  0 '***' 0.001 '**' 0.01 '*' 0.05 '.' 0.1 ' ' 1

```

```
confint(m.combined.intext.IV)
```

```

## [[1]]
##           estimate ci.lb ci.ub
## sigma^2.1  0.0151 0.0064 0.0385
## sigma.1    0.1228 0.0803 0.1962
##
##
## [[2]]
##           estimate ci.lb ci.ub
## sigma^2.2  0.0058 0.0031 0.0101
## sigma.2    0.0761 0.0558 0.1007

```

```
confint(m.combined.intext.IV.coresthgh)
```

```

## [[1]]
##           estimate ci.lb ci.ub

```

```
## sigma^2.1  0.0130 0.0043 0.0364
## sigma.1    0.1142 0.0658 0.1907
##
##
## [[2]]
##
##          estimate ci.lb ci.ub
## sigma^2.2  0.0068 0.0040 0.0112
## sigma.2    0.0823 0.0633 0.1057
```

```
pander(comptable(list(m.combined.intext.IV,m.combined.intext.IV.coresthgh),
  c("none","high")))
```

|                            | none   | high   | diff    |
|----------------------------|--------|--------|---------|
| <b>intrcpt</b>             | 0.16   | 0.17   | 0.0036  |
| <b>IVshortHollingshead</b> | 0.022  | 0.018  | -0.0038 |
| <b>IVshortParent Ed.</b>   | 0.063  | 0.054  | -0.0084 |
| <b>IVshortPoverty</b>      | 0.058  | 0.055  | -0.0032 |
| <b>IVshortAssistance</b>   | 0.13   | 0.13   | -0.0013 |
| <b>IVshortSubjective</b>   | 0.049  | 0.025  | -0.023  |
| <b>ExternalizingTRUE</b>   | 0.056  | 0.057  | 0.0015  |
| <b>int.ci.l</b>            | 0.076  | 0.082  | 0.0058  |
| <b>int.ci.u</b>            | 0.25   | 0.25   | 0.0015  |
| <b>s2between</b>           | 0.015  | 0.013  | -0.002  |
| <b>s2within</b>            | 0.0058 | 0.0068 | 0.00098 |

## 11 SES clustered models

As noted previously, comparing all effects in the same parameter (standard mean difference) allows for maximal power and ability to model moderation. However, that approach makes some assumptions about the underlying data which are not certain, and yields effect sizes that are not always interpretable (for example correlation between two continuous variables is easily understood, whereas standard mean difference between the same does not since there are not necessarily two groups). We therefore also present these bivariate models in their proper effect parameters:

```
contextcols<-c("efid","study.ID","n","IVshort","DVshort","p.entered")
ORcols<-c("lOR","lOR.v")
Gcols<-c("g","g.v")
Rcols<-c("Zr","Zr.v")
```

## 11.1 Parent Education (continuous)

|            | efid | study.ID     | n    | IVshort    | DVshort | p.entered | g     | g.v    |
|------------|------|--------------|------|------------|---------|-----------|-------|--------|
| <b>4</b>   | 4    | GSM          | 1420 | Parent Ed. | Ext.    | g         | 0.11  | 0.051  |
| <b>49</b>  | 49   | PHDCN        | 2805 | Parent Ed. | Int.    | Zr        | 0.3   | 0.0015 |
| <b>72</b>  | 72   | PYS.y        | 503  | Parent Ed. | Dep.    | IOR       | 0.22  | 0.018  |
| <b>91</b>  | 91   | CIC          | 776  | Parent Ed. | Int.    | g         | 0.44  | 0.014  |
| <b>95</b>  | 95   | CIC          | 776  | Parent Ed. | Ext.    | g         | 0.58  | 0.014  |
| <b>99</b>  | 99   | FF           | 1588 | Parent Ed. | Ext.    | g         | 0.076 | 0.0046 |
| <b>103</b> | 103  | FF           | 2259 | Parent Ed. | Ext. w2 | g         | 0.25  | 0.0039 |
| <b>107</b> | 107  | FF           | 2259 | Parent Ed. | Int. w2 | g         | 0.24  | 0.0039 |
| <b>115</b> | 115  | PSID.CDS2    | 1409 | Parent Ed. | Dep.    | g         | 0.08  | 0.0054 |
| <b>119</b> | 119  | PSID.CDS2014 | 1064 | Parent Ed. | Dep.    | g         | 0.23  | 0.0092 |

```

select.PEbySymp<-esdf$IV=="Parental Ed" & esdf$Continuous==TRUE
m.PEbySymp<-rma.mv(yi=g,
  V=g.v,
  random=~1 | study.ID/efid,
  slab=paste(study.ID, efid,sep=" "),
  data=esdf[select.PEbySymp,]
)

m.PEbySymp.coresthhigh<-rma.mv(yi=g,
  V=with(esdf[select.PEbySymp,],
    clubSandwich::impute_covariance_matrix(g.v,study.ID,coresthhigh)),
  random=~1 | study.ID/efid,
  slab=paste(study.ID, efid,sep=" "),
  data=esdf[select.PEbySymp,]
)

summary(m.PEbySymp)

```

```

##
## Multivariate Meta-Analysis Model (k = 10; method: REML)
##
##   logLik  Deviance      AIC      BIC      AICc
##   4.8574  -9.7148  -3.7148  -3.1231  1.0852

```

```
##
## Variance Components:
##
##      estim  sqrt  nlvls  fixed      factor
## sigma^2.1 0.0113 0.1061    7    no      study.ID
## sigma^2.2 0.0030 0.0543   10    no  study.ID/efid
##
## Test for Heterogeneity:
## Q(df = 9) = 23.4758, p-val = 0.0052
##
## Model Results:
##
## estimate      se      zval      pval      ci.lb      ci.ub
## 0.2464 0.0553 4.4554 <.0001 0.1380 0.3548 ***
##
## ---
## Signif. codes:  0 '***' 0.001 '**' 0.01 '*' 0.05 '.' 0.1 ' ' 1
```

```
confint(m.PEbySymp)
```

```
## [[1]]
##
##      estimate ci.lb ci.ub
## sigma^2.1 0.0113 0.0000 0.0764
## sigma.1    0.1061 0.0000 0.2764
##
##
## [[2]]
##
##      estimate ci.lb ci.ub
## sigma^2.2 0.0030 0.0000 0.0410
## sigma.2    0.0543 0.0000 0.2024
```

```
pander(comptable(list(m.PEbySymp,m.PEbySymp.coresthhigh),
  c("none","high")))
```

|                 | none | high | diff    |
|-----------------|------|------|---------|
| <b>intrcpt</b>  | 0.25 | 0.24 | -0.0026 |
| <b>int.ci.l</b> | 0.14 | 0.14 | 0.0013  |
| <b>int.ci.u</b> | 0.35 | 0.35 | -0.0066 |

|                  | none  | high   | diff    |
|------------------|-------|--------|---------|
| <b>s2between</b> | 0.011 | 0.0085 | -0.0028 |
| <b>s2within</b>  | 0.003 | 0.0043 | 0.0013  |

## 11.2 Parent Education (disordered)

|           | efid | study.ID | n    | IVshort    | DVshort | p.entered | IOR   | IOR.v  |
|-----------|------|----------|------|------------|---------|-----------|-------|--------|
| <b>10</b> | 10   | GSM      | 1420 | Parent Ed. | ADHD    | IOR       | 1.4   | 2.5    |
| <b>11</b> | 11   | GSM      | 1420 | Parent Ed. | PTSD    | IOR       | 1.6   | 102    |
| <b>12</b> | 12   | GSM      | 1420 | Parent Ed. | Dep.    | IOR       | -0.35 | 101    |
| <b>13</b> | 13   | GSM      | 1420 | Parent Ed. | Anx.    | IOR       | 0.15  | 2.4    |
| <b>14</b> | 14   | GSM      | 1420 | Parent Ed. | DBD     | IOR       | 1.1   | 0.93   |
| <b>17</b> | 17   | MECA     | 984  | Parent Ed. | ADHD    | IOR       | -0.12 | 0.37   |
| <b>21</b> | 21   | MECA     | 984  | Parent Ed. | Dep.    | IOR       | 0.18  | 0.29   |
| <b>25</b> | 25   | MECA     | 984  | Parent Ed. | Anx.    | IOR       | 0.41  | 0.099  |
| <b>29</b> | 29   | MECA     | 984  | Parent Ed. | DBD     | IOR       | 0.35  | 0.18   |
| <b>32</b> | 32   | NCSA     | 6483 | Parent Ed. | PTSD    | IOR       | 0     | 0.031  |
| <b>33</b> | 33   | NCSA     | 6483 | Parent Ed. | ADHD    | IOR       | 0.53  | 0.048  |
| <b>37</b> | 37   | NCSA     | 6483 | Parent Ed. | Dep.    | IOR       | 0     | 0.044  |
| <b>38</b> | 38   | NCSA     | 6483 | Parent Ed. | Anx.    | IOR       | 0.53  | 0.018  |
| <b>39</b> | 39   | NCSA     | 6483 | Parent Ed. | DBD     | IOR       | 0.41  | 0.063  |
| <b>52</b> | 52   | PHDCN    | 2805 | Parent Ed. | Int.    | Zr        | 0.68  | 0.0052 |
| <b>67</b> | 67   | PYS.y    | 503  | Parent Ed. | DBD     | IOR       | 0.41  | 0.061  |
| <b>68</b> | 68   | PYS.o    | 506  | Parent Ed. | DBD     | IOR       | 0.79  | 0.065  |
| <b>75</b> | 75   | CIC      | 776  | Parent Ed. | ADHD    | IOR       | 0.54  | 0.1    |
| <b>79</b> | 79   | CIC      | 776  | Parent Ed. | Dep.    | IOR       | 0.56  | 0.31   |
| <b>83</b> | 83   | CIC      | 776  | Parent Ed. | Anx.    | IOR       | 0.73  | 0.064  |
| <b>87</b> | 87   | CIC      | 776  | Parent Ed. | DBD     | IOR       | 0.83  | 0.063  |

```
select.PEbyDis<-esdf$IV=="Parental Ed" & esdf$Continuous==FALSE
m.PEbyDis<-rma.mv(yi=IOR,
                  V=diag(10R.v),
                  random=~1 | study.ID/efid,
                  slab=paste(study.ID, efid, sep=" "),
                  data=esdf[select.PEbyDis,])
```

```

)
m.PEbyDis.coresthgh<-rma.mv(yi=lOR,
                             V=with(esdf[select.PEbyDis,],
                                       clubSandwich::impute_covariance_matrix(g.v,study.ID,coresthgh)),
                             random=~1 | study.ID/efid,
                             slab=paste(study.ID, efid,sep=" "),
                             data=esdf[select.PEbyDis,]
                             )

summary(m.PEbyDis)

```

```

##
## Multivariate Meta-Analysis Model (k = 21; method: REML)
##
##   logLik  Deviance      AIC      BIC      AICc
## -13.5395  27.0791  33.0791  36.0663  34.5791
##
## Variance Components:
##
##           estim  sqrt  nlvls  fixed      factor
## sigma^2.1  0.0232  0.1523    7    no      study.ID
## sigma^2.2  0.0158  0.1256   21    no  study.ID/efid
##
## Test for Heterogeneity:
## Q(df = 20) = 25.9820, p-val = 0.1664
##
## Model Results:
##
## estimate      se    zval    pval   ci.lb   ci.ub
##  0.5205  0.0966  5.3909 <.0001  0.3313  0.7097 ***
##
## ---
## Signif. codes:  0 '***' 0.001 '**' 0.01 '*' 0.05 '.' 0.1 ' ' 1

```

```
confint(m.PEbyDis)
```

```
## [[1]]
##
```



```
##          estimate ci.lb ci.ub
## sigma^2.1  0.0232 0.0000 0.2060
## sigma.1    0.1523 0.0000 0.4539
##
##
## [[2]]
##
##          estimate ci.lb ci.ub
## sigma^2.2  0.0158 0.0000 0.1128
## sigma.2    0.1256 0.0000 0.3359
```

```
pander(comptable(list(m.PEbyDis,m.PEbyDis.coresthhigh),
  c("none","high")))
```

|                  | none  | high  | diff    |
|------------------|-------|-------|---------|
| <b>intrcpt</b>   | 0.52  | 0.52  | 0.0023  |
| <b>int.ci.l</b>  | 0.33  | 0.34  | 0.006   |
| <b>int.ci.u</b>  | 0.71  | 0.71  | -0.0015 |
| <b>s2between</b> | 0.023 | 0.024 | 0.00092 |
| <b>s2within</b>  | 0.016 | 0.035 | 0.02    |

### 11.3 Poverty Status (poverty line) (continuous)

|            | efid | study.ID     | n    | IVshort | DVshort | p.entered | g     | g.v    |
|------------|------|--------------|------|---------|---------|-----------|-------|--------|
| <b>3</b>   | 3    | GSM          | 1420 | Poverty | Ext.    | g         | 0.31  | 0.0033 |
| <b>47</b>  | 47   | PGS          | 1232 | Poverty | DBD     | g         | 0.36  | 0.0033 |
| <b>48</b>  | 48   | PGS          | 1232 | Poverty | Dep.    | g         | 0.21  | 0.0033 |
| <b>90</b>  | 90   | CIC          | 776  | Poverty | Int.    | g         | 0.48  | 0.0099 |
| <b>94</b>  | 94   | CIC          | 776  | Poverty | Ext.    | g         | 0.48  | 0.0099 |
| <b>98</b>  | 98   | FF           | 1589 | Poverty | Ext.    | g         | 0.21  | 0.0028 |
| <b>102</b> | 102  | FF           | 2246 | Poverty | Ext. w2 | g         | 0.33  | 0.0021 |
| <b>106</b> | 106  | FF           | 2246 | Poverty | Int. w2 | g         | 0.35  | 0.0021 |
| <b>114</b> | 114  | PSID.CDS2    | 1455 | Poverty | Dep.    | g         | 0.053 | 0.0064 |
| <b>118</b> | 118  | PSID.CDS2014 | 1045 | Poverty | Dep.    | g         | 0.019 | 0.008  |

```

select.PVbySymp<-esdf$IV=="Poverty Status (poverty line)" & esdf$Continuous==TRUE
m.PVbySymp<-rma.mv(yi=g,
  V=g.v,
  random=~1 | study.ID/efid,
  slab=paste(study.ID, efid,sep=" "),
  data=esdf[select.PVbySymp,]
)

m.PVbySymp.coresthhigh<-rma.mv(yi=g,
  V=with(esdf[select.PVbySymp,],
    clubSandwich::impute_covariance_matrix(g.v,study.ID,coresthhigh)),
  random=~1 | study.ID/efid,
  slab=paste(study.ID, efid,sep=" "),
  data=esdf[select.PVbySymp,]
)

summary(m.PVbySymp)

```

```

##
## Multivariate Meta-Analysis Model (k = 10; method: REML)
##
##   logLik  Deviance      AIC      BIC      AICc
##   5.1047 -10.2095  -4.2095  -3.6178   0.5905
##
## Variance Components:
##
##           estim  sqrt  nlvls  fixed      factor
## sigma^2.1  0.0188  0.1372     6    no    study.ID
## sigma^2.2  0.0039  0.0626    10    no  study.ID/efid
##
## Test for Heterogeneity:
## Q(df = 9) = 34.2193, p-val < .0001
##
## Model Results:
##
## estimate      se    zval    pval   ci.lb   ci.ub
##   0.2549  0.0650  3.9205 <.0001  0.1275  0.3823 ***
##

```

```
## ---
## Signif. codes:  0 '***' 0.001 '**' 0.01 '*' 0.05 '.' 0.1 ' ' 1
```

```
confint(m.PVbySymp)
```

```
## [[1]]
##
##      estimate ci.lb ci.ub
## sigma^2.1  0.0188 0.0000 0.1250
## sigma.1    0.1372 0.0000 0.3535
##
##
## [[2]]
##
##      estimate ci.lb ci.ub
## sigma^2.2  0.0039 0.0000 0.0424
## sigma.2    0.0626 0.0000 0.2058
```

```
pander(comtable(list(m.PVbySymp,m.PVbySymp.coresthhigh),c("none","high")))
```

|                  | none   | high   | diff    |
|------------------|--------|--------|---------|
| <b>intrcpt</b>   | 0.25   | 0.25   | -0.0011 |
| <b>int.ci.l</b>  | 0.13   | 0.13   | 3e-04   |
| <b>int.ci.u</b>  | 0.38   | 0.38   | -0.0024 |
| <b>s2between</b> | 0.019  | 0.017  | -0.0014 |
| <b>s2within</b>  | 0.0039 | 0.0047 | 0.00073 |

## 11.4 Poverty Status (poverty line) (disordered)

|           | efid | study.ID | n    | IVshort | DVshort | p.entered | IOR   | IOR.v |
|-----------|------|----------|------|---------|---------|-----------|-------|-------|
| <b>5</b>  | 5    | GSM      | 1420 | Poverty | ADHD    | IOR       | 0.21  | 0.24  |
| <b>6</b>  | 6    | GSM      | 1420 | Poverty | PTSD    | IOR       | -2.6  | 102   |
| <b>7</b>  | 7    | GSM      | 1420 | Poverty | Dep.    | IOR       | -0.46 | 2.7   |
| <b>8</b>  | 8    | GSM      | 1420 | Poverty | Anx.    | IOR       | 0.96  | 0.063 |
| <b>9</b>  | 9    | GSM      | 1420 | Poverty | DBD     | IOR       | 1.1   | 0.048 |
| <b>15</b> | 15   | MECA     | 970  | Poverty | ADHD    | IOR       | -0.19 | 0.17  |
| <b>19</b> | 19   | MECA     | 970  | Poverty | Dep.    | IOR       | 0.34  | 0.12  |
| <b>23</b> | 23   | MECA     | 970  | Poverty | Anx.    | IOR       | 0.4   | 0.046 |

|           | efid | study.ID | n    | IVshort | DVshort | p.entered | IOR   | IOR.v  |
|-----------|------|----------|------|---------|---------|-----------|-------|--------|
| <b>27</b> | 27   | MECA     | 970  | Poverty | DBD     | IOR       | 0.6   | 0.074  |
| <b>34</b> | 34   | NCSA     | 6483 | Poverty | Dep.    | IOR       | 0     | 0.063  |
| <b>35</b> | 35   | NCSA     | 6483 | Poverty | Anx.    | IOR       | 0.26  | 0.022  |
| <b>36</b> | 36   | NCSA     | 6483 | Poverty | DBD     | IOR       | 0.18  | 0.037  |
| <b>43</b> | 43   | NHANES   | 3081 | Poverty | DBD     | IOR       | 0.4   | 0.067  |
| <b>44</b> | 44   | NHANES   | 3081 | Poverty | ADHD    | IOR       | 0.24  | 0.011  |
| <b>45</b> | 45   | NHANES   | 4150 | Poverty | Dep.    | IOR       | 0.015 | 0.034  |
| <b>55</b> | 55   | PHDCN    | 2810 | Poverty | Int.    | IOR       | 0.47  | 0.0048 |
| <b>56</b> | 56   | PHDCN    | 2810 | Poverty | Ext.    | IOR       | 0.64  | 0.01   |
| <b>74</b> | 74   | CIC      | 776  | Poverty | ADHD    | IOR       | 0.86  | 0.066  |
| <b>78</b> | 78   | CIC      | 776  | Poverty | Dep.    | IOR       | 1.5   | 0.17   |
| <b>82</b> | 82   | CIC      | 776  | Poverty | Anx.    | IOR       | 0.72  | 0.046  |
| <b>86</b> | 86   | CIC      | 776  | Poverty | DBD     | IOR       | 1.1   | 0.043  |

```

select.PVbyDis<-esdf$IV=="Poverty Status (poverty line)" & esdf$Continuous==FALSE
m.PVbyDis<-rma.mv(yi=IOR,
                  V=diag(10R.v),
                  random=~1 | study.ID/efid,
                  slab=paste(study.ID, efid,sep=" "),
                  data=esdf[select.PVbyDis,]
                  )

m.PVbyDis.coresthgh<-rma.mv(yi=IOR,
                             V=with(esdf[select.PVbyDis,],
                                     clubSandwich::impute_covariance_matrix(g.v,study.ID,coresthgh)),
                             random=~1 | study.ID/efid,
                             slab=paste(study.ID, efid,sep=" "),
                             data=esdf[select.PVbyDis,]
                             )

summary(m.PVbyDis)

##
## Multivariate Meta-Analysis Model (k = 21; method: REML)
##
##   logLik  Deviance      AIC      BIC     AICc

```

```

## -9.5875 19.1750 25.1750 28.1622 26.6750
##
## Variance Components:
##
##      estim  sqrt  nlvls  fixed      factor
## sigma^2.1 0.1036 0.3219    6    no      study.ID
## sigma^2.2 0.0015 0.0389   21    no  study.ID/efid
##
## Test for Heterogeneity:
## Q(df = 20) = 57.4314, p-val < .0001
##
## Model Results:
##
## estimate      se      zval      pval      ci.lb      ci.ub
## 0.5270 0.1399 3.7662 0.0002 0.2527 0.8012 ***
##
## ---
## Signif. codes:  0 '***' 0.001 '**' 0.01 '*' 0.05 '.' 0.1 ' ' 1

```

```
confint(m.PVbyDis)
```

```

## [[1]]
##
##      estimate  ci.lb  ci.ub
## sigma^2.1  0.1036 0.0264 0.5528
## sigma.1     0.3219 0.1625 0.7435
##
##
## [[2]]
##
##      estimate  ci.lb  ci.ub
## sigma^2.2  0.0015 0.0000 0.0549
## sigma.2     0.0389 0.0000 0.2342

```

```
pander(comptable(list(m.PVbyDis,m.PVbyDis.coresthig),c("none","high")))
```

|                 | none | high | diff    |
|-----------------|------|------|---------|
| <b>intrcpt</b>  | 0.53 | 0.52 | -0.0026 |
| <b>int.ci.l</b> | 0.25 | 0.24 | -0.014  |
| <b>int.ci.u</b> | 0.8  | 0.81 | 0.0092  |

|                  | none   | high  | diff    |
|------------------|--------|-------|---------|
| <b>s2between</b> | 0.1    | 0.1   | -0.0016 |
| <b>s2within</b>  | 0.0015 | 0.053 | 0.052   |

## 11.5 Receipt of Public Assistance (continuous)

|            | efid | study.ID     | n    | IVshort    | DVshort | p.entered | g     | g.v    |
|------------|------|--------------|------|------------|---------|-----------|-------|--------|
| <b>51</b>  | 51   | PHDCN        | 2805 | Assistance | Int.    | Zr        | 0.18  | 0.0015 |
| <b>70</b>  | 70   | PYS.y        | 503  | Assistance | Dep.    | IOR       | 0.35  | 0.023  |
| <b>71</b>  | 71   | PYS.m        | 508  | Assistance | Dep.    | IOR       | 0.29  | 0.032  |
| <b>92</b>  | 92   | CIC          | 776  | Assistance | Int.    | g         | 0.69  | 0.028  |
| <b>96</b>  | 96   | CIC          | 776  | Assistance | Ext.    | g         | 0.48  | 0.028  |
| <b>100</b> | 100  | FF           | 1589 | Assistance | Ext.    | g         | 0.3   | 0.0028 |
| <b>104</b> | 104  | FF           | 2282 | Assistance | Ext. w2 | g         | 0.42  | 0.0052 |
| <b>108</b> | 108  | FF           | 2282 | Assistance | Int. w2 | g         | 0.4   | 0.0052 |
| <b>111</b> | 111  | NSPC         | 823  | Assistance | Ext.    | Zr        | 0.3   | 0.0052 |
| <b>112</b> | 112  | NSPC         | 823  | Assistance | Int.    | Zr        | -0.02 | 0.0049 |
| <b>116</b> | 116  | PSID.CDS2    | 1452 | Assistance | Dep.    | g         | 0.1   | 0.0072 |
| <b>120</b> | 120  | PSID.CDS2014 | 1045 | Assistance | Dep.    | g         | 0.08  | 0.0059 |

```

select.PAbySymp<-esdf$IV=="Receipt of Public Assistance" & esdf$Continuous==TRUE
m.PAbySymp<-rma.mv(yi=g,
  V=g.v,
  random=~1 | study.ID/efid,
  slab=paste(study.ID, efid,sep=" "),
  data=esdf[select.PAbySymp,]
)

m.PAbySymp.coresthhigh<-rma.mv(yi=g,
  V=with(esdf[select.PAbySymp,],
    clubSandwich::impute_covariance_matrix(g.v,study.ID,coresthhigh)),
  random=~1 | study.ID/efid,
  slab=paste(study.ID, efid,sep=" "),
  data=esdf[select.PAbySymp,]
)

```

```
summary(m.PAbySymp)
```

```
##
## Multivariate Meta-Analysis Model (k = 12; method: REML)
##
##   logLik  Deviance      AIC      BIC      AICc
##   3.2961  -6.5922  -0.5922   0.6015   2.8364
##
## Variance Components:
##
##           estim    sqrt  nlvls  fixed      factor
## sigma^2.1  0.0136  0.1165     8     no      study.ID
## sigma^2.2  0.0111  0.1052    12     no  study.ID/efid
##
## Test for Heterogeneity:
## Q(df = 11) = 45.8283, p-val < .0001
##
## Model Results:
##
## estimate      se    zval    pval   ci.lb   ci.ub
##   0.2554  0.0607  4.2064  <.0001  0.1364  0.3744  ***
##
## ---
## Signif. codes:  0 '***' 0.001 '**' 0.01 '*' 0.05 '.' 0.1 ' ' 1
```

```
confint(m.PAbySymp)
```

```
## [[1]]
##
##           estimate  ci.lb  ci.ub
## sigma^2.1  0.0136  0.0000  0.0903
## sigma.1    0.1165  0.0000  0.3005
##
##
## [[2]]
##
##           estimate  ci.lb  ci.ub
## sigma^2.2  0.0111  0.0003  0.0660
## sigma.2    0.1052  0.0164  0.2569
```

```
pander(comtable(list(m.PAbySymp,m.PAbySymp.coresthhigh),c("none","high")))
```

|                  | none  | high  | diff    |
|------------------|-------|-------|---------|
| <b>intrcpt</b>   | 0.26  | 0.25  | -0.0035 |
| <b>int.ci.l</b>  | 0.14  | 0.14  | 0.00012 |
| <b>int.ci.u</b>  | 0.37  | 0.37  | -0.0071 |
| <b>s2between</b> | 0.014 | 0.01  | -0.0031 |
| <b>s2within</b>  | 0.011 | 0.012 | 0.0013  |

## 11.6 Receipt of Public Assistance (disordered)

|           | efid | study.ID | n    | IVshort    | DVshort | p.entered | IOR  | IOR.v  |
|-----------|------|----------|------|------------|---------|-----------|------|--------|
| <b>18</b> | 18   | MECA     | 290  | Assistance | ADHD    | IOR       | 0.88 | 0.35   |
| <b>22</b> | 22   | MECA     | 290  | Assistance | Dep.    | IOR       | 0.49 | 0.2    |
| <b>26</b> | 26   | MECA     | 290  | Assistance | Anx.    | IOR       | 0.35 | 0.11   |
| <b>30</b> | 30   | MECA     | 290  | Assistance | DBD     | IOR       | 1.4  | 0.14   |
| <b>46</b> | 46   | PGS      | 2393 | Assistance | DBD     | IOR       | 1.3  | 0.013  |
| <b>54</b> | 54   | PHDCN    | 2805 | Assistance | Int.    | Zr        | 0.24 | 0.0048 |
| <b>61</b> | 61   | PYS.y    | 503  | Assistance | ADHD    | IOR       | 0.53 | 0.052  |
| <b>64</b> | 64   | PYS.y    | 503  | Assistance | DBD     | IOR       | 0.79 | 0.065  |
| <b>65</b> | 65   | PYS.m    | 508  | Assistance | DBD     | IOR       | 0.53 | 0.1    |
| <b>66</b> | 66   | PYS.o    | 506  | Assistance | DBD     | IOR       | 0.83 | 0.073  |
| <b>76</b> | 76   | CIC      | 776  | Assistance | ADHD    | IOR       | 1.2  | 0.14   |
| <b>80</b> | 80   | CIC      | 776  | Assistance | Dep.    | IOR       | 1.4  | 0.33   |
| <b>84</b> | 84   | CIC      | 776  | Assistance | Anx.    | IOR       | 1.1  | 0.11   |
| <b>88</b> | 88   | CIC      | 776  | Assistance | DBD     | IOR       | 0.94 | 0.12   |

```
select.PAbyDis<-esdf$IV=="Receipt of Public Assistance" & esdf$Continuous==FALSE
m.PAbyDis<-rma.mv(yi=IOR,
                  V=diag(IOR.v),
                  random=~1 | study.ID/efid,
                  slab=paste(study.ID, efid,sep=" "),
                  data=esdf[select.PAbyDis,]
                  )
```



```

m.PAbyDis.coresthhigh<-rma.mv(yi=lOR,
                             V=with(esdf[select.PAbyDis,],
                                     clubSandwich::impute_covariance_matrix(g.v,study.ID,coresthhigh)),
                             random=~1 | study.ID/efid,
                             slab=paste(study.ID, efid,sep=" "),
                             data=esdf[select.PAbyDis,]
                             )

```

```
summary(m.PAbyDis)
```

```

##
## Multivariate Meta-Analysis Model (k = 14; method: REML)
##
##   logLik  Deviance      AIC      BIC      AICc
## -6.6482  13.2965   19.2965   20.9913   21.9631
##
## Variance Components:
##
##           estim    sqrt  nlvls  fixed      factor
## sigma^2.1  0.1176  0.3429     7    no      study.ID
## sigma^2.2  0.0014  0.0374    14    no  study.ID/efid
##
## Test for Heterogeneity:
## Q(df = 13) = 74.8067, p-val < .0001
##
## Model Results:
##
## estimate      se    zval    pval   ci.lb   ci.ub
##  0.7632  0.1493  5.1131 <.0001  0.4706  1.0557 ***
##
## ---
## Signif. codes:  0 '***' 0.001 '**' 0.01 '*' 0.05 '.' 0.1 ' ' 1

```

```
confint(m.PAbyDis)
```

```

## [[1]]
##
##           estimate ci.lb ci.ub
## sigma^2.1  0.1176 0.0000 0.5324

```

```
## sigma.1      0.3429 0.0000 0.7297
##
##
## [[2]]
##
##          estimate ci.lb ci.ub
## sigma^2.2  0.0014 0.0000 0.2926
## sigma.2    0.0374 0.0000 0.5409
```

```
pander(comptable(list(m.PAbyDis,m.PAbyDis.coresthgh),c("none","high")))
```

|                  | none   | high  | diff   |
|------------------|--------|-------|--------|
| <b>intrcpt</b>   | 0.76   | 0.79  | 0.031  |
| <b>int.ci.l</b>  | 0.47   | 0.56  | 0.084  |
| <b>int.ci.u</b>  | 1.1    | 1     | -0.022 |
| <b>s2between</b> | 0.12   | 0.028 | -0.089 |
| <b>s2within</b>  | 0.0014 | 0.095 | 0.094  |

## 11.7 Family Income (continuous)

|            | efid | study.ID     | n    | IVshort | DVshort | p.entered | g       | g.v    |
|------------|------|--------------|------|---------|---------|-----------|---------|--------|
| <b>50</b>  | 50   | PHDCN        | 2805 | Income  | Int.    | Zr        | -0.094  | 0.0014 |
| <b>57</b>  | 57   | PHDCN        | 1517 | Income  | Int.    | Zr        | -0.14   | 0.0027 |
| <b>58</b>  | 58   | PHDCN        | 1517 | Income  | Ext.    | Zr        | -0.06   | 0.0026 |
| <b>89</b>  | 89   | CIC          | 771  | Income  | Int.    | Zr        | -0.43   | 0.0059 |
| <b>93</b>  | 93   | CIC          | 771  | Income  | Ext.    | Zr        | -0.37   | 0.0058 |
| <b>97</b>  | 97   | FF           | 1589 | Income  | Ext.    | Zr        | -0.16   | 0.0026 |
| <b>101</b> | 101  | FF           | 2257 | Income  | Ext. w2 | Zr        | -0.27   | 0.0019 |
| <b>105</b> | 105  | FF           | 2230 | Income  | Int. w2 | Zr        | -0.22   | 0.0019 |
| <b>113</b> | 113  | PSID.CDS2    | 1455 | Income  | Dep.    | Zr        | 0.022   | 0.0028 |
| <b>117</b> | 117  | PSID.CDS2014 | 1045 | Income  | Dep.    | Zr        | -0.0082 | 0.0038 |

```
select.INCbySymp<-esdf$IV=="Family Income" & esdf$Continuous==TRUE
m.INCbySymp<-rma.mv(yi=Zr,
                    V=Zr.v,
```

```

    random=~1 | study.ID/efid,
    slab=paste(study.ID, efid,sep=" "),
    data=esdf[select.INCbySymp,]
  )

m.INCbySymp.coresthhigh<-rma.mv(yi=Zr,
  V=with(esdf[select.INCbySymp,],
    clubSandwich::impute_covariance_matrix(Zr.v,study.ID,coresthhigh)),
  random=~1 | study.ID/efid,
  slab=paste(study.ID, efid,sep=" "),
  data=esdf[select.INCbySymp,]
  )

summary(m.INCbySymp)

```

```

##
## Multivariate Meta-Analysis Model (k = 10; method: REML)
##
##   logLik  Deviance      AIC      BIC      AICc
##  14.8793  -29.7586  -23.7586  -23.1670  -18.9586
##
## Variance Components:
##
##           estim  sqrt  nlvls  fixed      factor
## sigma^2.1  0.0064  0.0802     5     no      study.ID
## sigma^2.2  0.0000  0.0000    10     no  study.ID/efid
##
## Test for Heterogeneity:
## Q(df = 9) = 54.4203, p-val < .0001
##
## Model Results:
##
## estimate      se      zval    pval    ci.lb  ci.ub  .
## -0.0708  0.0373  -1.8999  0.0575  -0.1438  0.0022  .
##
## ---
## Signif. codes:  0 '***' 0.001 '**' 0.01 '*' 0.05 '.' 0.1 ' ' 1

```

```
confint(m.INCbySymp)
```

```
## [[1]]
##
##          estimate ci.lb ci.ub
## sigma^2.1  0.0064 0.0016 0.0420
## sigma.1    0.0802 0.0397 0.2050
##
##
## [[2]]
##
##          estimate ci.lb ci.ub
## sigma^2.2  0.0000 0.0000 0.0020
## sigma.2    0.0000 0.0000 0.0442
```

```
pander(comtable(list(m.INCbySymp,m.INCbySymp.coresthgh),c("none","high")))
```

|                  | none   | high    | diff     |
|------------------|--------|---------|----------|
| <b>intrcpt</b>   | -0.071 | -0.07   | 0.00035  |
| <b>int.ci.l</b>  | -0.14  | -0.14   | 0.00062  |
| <b>int.ci.u</b>  | 0.0022 | 0.0023  | 7.1e-05  |
| <b>s2between</b> | 0.0064 | 0.0062  | -0.00018 |
| <b>s2within</b>  | 2e-12  | 8.3e-05 | 8.3e-05  |

## 11.8 Family Income (disordered)

|           | efid | study.ID | n    | IVshort | DVshort | p.entered | g     | g.v    |
|-----------|------|----------|------|---------|---------|-----------|-------|--------|
| <b>16</b> | 16   | MECA     | 970  | Income  | ADHD    | g2        | -0.2  | 0.018  |
| <b>20</b> | 20   | MECA     | 970  | Income  | Dep.    | g2        | -0.17 | 0.017  |
| <b>24</b> | 24   | MECA     | 970  | Income  | Anx.    | g2        | -0.18 | 0.0062 |
| <b>28</b> | 28   | MECA     | 970  | Income  | DBD     | g2        | -0.39 | 0.012  |
| <b>31</b> | 31   | NCSA     | 6483 | Income  | PTSD    | IOR       | 0.14  | 0.017  |
| <b>53</b> | 53   | PHDCN    | 2805 | Income  | Int.    | Zr        | -0.33 | 0.0015 |
| <b>73</b> | 73   | CIC      | 771  | Income  | ADHD    | g2        | -0.4  | 0.012  |
| <b>77</b> | 77   | CIC      | 771  | Income  | Dep.    | g2        | -0.56 | 0.042  |
| <b>81</b> | 81   | CIC      | 771  | Income  | Anx.    | g2        | -0.38 | 0.0075 |
| <b>85</b> | 85   | CIC      | 771  | Income  | DBD     | g2        | -0.45 | 0.0074 |

We need to reverse code the NCSA income effect, as income was coded as <3 PIR.

```
esdf[esdf$efid=="31", "g"] <- esdf[esdf$efid=="31", "g"] * -1

select.INCbyDis <- esdf$IV == "Family Income" & esdf$Continuous == FALSE
m.INCbyDis <- rma.mv(yi=g,
                    V=diag(g.v),
                    random=~1 | study.ID/efid,
                    slab=paste(study.ID, efid, sep=" "),
                    data=esdf[select.INCbyDis,]
                    )

m.INCbyDis.coresthhigh <- rma.mv(yi=g,
                                V=with(esdf[select.INCbyDis,],
                                        clubSandwich::impute_covariance_matrix(g.v, study.ID, coresthhigh)),
                                random=~1 | study.ID/efid,
                                slab=paste(study.ID, efid, sep=" "),
                                data=esdf[select.INCbyDis,]
                                )

summary(m.INCbyDis)
```

```
##
## Multivariate Meta-Analysis Model (k = 10; method: REML)
##
##   logLik  Deviance      AIC      BIC      AICc
##   7.0566 -14.1131  -8.1131  -7.5215  -3.3131
##
## Variance Components:
##
##           estim  sqrt  nlvls  fixed      factor
## sigma^2.1  0.0064  0.0801    4    no      study.ID
## sigma^2.2  0.0000  0.0000   10    no  study.ID/efid
##
## Test for Heterogeneity:
## Q(df = 9) = 12.1170, p-val = 0.2068
##
## Model Results:
##
## estimate      se      zval      pval      ci.lb      ci.ub
```

```
## -0.3054 0.0508 -6.0146 <.0001 -0.4050 -0.2059 ***
##
## ---
## Signif. codes: 0 '***' 0.001 '**' 0.01 '*' 0.05 '.' 0.1 ' ' 1
```

```
confint(m.INCbyDis)
```

```
## [[1]]
##
##      estimate ci.lb ci.ub
## sigma^2.1  0.0064 0.0000 0.1000
## sigma.1    0.0801 0.0000 0.3162
##
##
## [[2]]
##
##      estimate ci.lb ci.ub
## sigma^2.2  0.0000 0.0000 0.0173
## sigma.2    0.0000 0.0000 0.1315
```

```
pander(comptable(list(m.INCbyDis,m.INCbyDis.coresthhigh),c("none","high")))
```

|                  | none    | high    | diff    |
|------------------|---------|---------|---------|
| <b>intrcpt</b>   | -0.31   | -0.3    | 7e-04   |
| <b>int.ci.l</b>  | -0.4    | -0.39   | 0.013   |
| <b>int.ci.u</b>  | -0.21   | -0.22   | -0.012  |
| <b>s2between</b> | 0.0064  | 0.0033  | -0.0031 |
| <b>s2within</b>  | 6.5e-12 | 1.5e-11 | 8.3e-12 |

## 11.9 Hollingshead (continuous)

|            | efid | study.ID | n   | IVshort      | DVshort | p.entered | Zr     | Zr.v   |
|------------|------|----------|-----|--------------|---------|-----------|--------|--------|
| <b>1</b>   | 1    | CDP      | 585 | Hollingshead | Ext.    | Zr        | -0.23  | 0.0017 |
| <b>2</b>   | 2    | CDP      | 585 | Hollingshead | Int.    | Zr        | -0.12  | 0.0017 |
| <b>69</b>  | 69   | PYS.y    | 503 | Hollingshead | Dep.    | IOR       | 0.13   | 0.0059 |
| <b>109</b> | 109  | NSPC     | 823 | Hollingshead | Ext.    | Zr        | 0      | 0.0012 |
| <b>110</b> | 110  | NSPC     | 823 | Hollingshead | Int.    | Zr        | -0.039 | 0.0012 |

Hollingshead index is usually represented as a continuous variable - here it's only dichotomized in PYS. This should be analyzed by Zr. It was reverse coded in the latter three effects, so that should be corrected.

```
esdf[c(69,109,110),"Zr"]<-esdf[c(69,109,110),"Zr"]*-1
select.HollbySymp<-esdf$IV=="Hollingshead" & esdf$Continuous==TRUE
m.HollbySymp<-rma.mv(yi=Zr,
                    V=Zr.v,
                    random=~1 | study.ID/efid,
                    slab=paste(study.ID, efid,sep=" "),
                    data=esdf[select.HollbySymp,]
                    )

m.HollbySymp.coresthhigh<-rma.mv(yi=Zr,
                                V=with(esdf[select.HollbySymp,],
                                        clubSandwich::impute_covariance_matrix(Zr.v,study.ID,coresthhigh)),
                                random=~1 | study.ID/efid,
                                slab=paste(study.ID, efid,sep=" "),
                                data=esdf[select.HollbySymp,]
                                )

summary(m.HollbySymp)
```

```
##
## Multivariate Meta-Analysis Model (k = 5; method: REML)
##
##   logLik  Deviance      AIC      BIC      AICc
##   3.9856  -7.9712  -1.9712  -3.8123  22.0288
##
## Variance Components:
##
##           estim  sqrt  nlvls  fixed      factor
## sigma^2.1  0.0101  0.1007    3    no      study.ID
## sigma^2.2  0.0016  0.0405    5    no  study.ID/efid
##
## Test for Heterogeneity:
## Q(df = 4) = 31.5092, p-val < .0001
##
## Model Results:
##
## estimate      se      zval      pval      ci.lb      ci.ub
```

```
## -0.0904 0.0663 -1.3643 0.1725 -0.2203 0.0395
##
## ---
## Signif. codes:  0 '***' 0.001 '**' 0.01 '*' 0.05 '.' 0.1 ' ' 1
```

```
confint(m.HollbySymp)
```

```
## [[1]]
##
##      estimate ci.lb ci.ub
## sigma^2.1  0.0101 0.0000 0.2094
## sigma.1    0.1007 0.0000 0.4576
##
##
## [[2]]
##
##      estimate ci.lb ci.ub
## sigma^2.2  0.0016 0.0000 0.0402
## sigma.2    0.0405 0.0000 0.2005
```

```
pander(comptable(list(m.HollbySymp,m.HollbySymp.coresthhigh),c("none","high")))
```

|                  | none   | high   | diff     |
|------------------|--------|--------|----------|
| <b>intrcpt</b>   | -0.09  | -0.09  | 0.00025  |
| <b>int.ci.l</b>  | -0.22  | -0.22  | 8.6e-05  |
| <b>int.ci.u</b>  | 0.039  | 0.04   | 4e-04    |
| <b>s2between</b> | 0.01   | 0.0097 | -0.00045 |
| <b>s2within</b>  | 0.0016 | 0.0022 | 0.00053  |

## 11.10 Hollingshead (disordered)

|           | efid | study.ID | n    | IVshort      | DVshort | p.entered | IOR  | IOR.v |
|-----------|------|----------|------|--------------|---------|-----------|------|-------|
| <b>59</b> | 59   | PYS      | 1509 | Hollingshead | Dep.    | IOR       | 0.53 | 0.039 |
| <b>60</b> | 60   | PYS.m    | 508  | Hollingshead | ADHD    | IOR       | 0.47 | 0.082 |
| <b>62</b> | 62   | PYS.m    | 508  | Hollingshead | DBD     | IOR       | 0.69 | 0.089 |
| <b>63</b> | 63   | PYS.o    | 506  | Hollingshead | DBD     | IOR       | 0.41 | 0.061 |



All of these effects are from the Pittsburgh Youth Study, so there is no meta-analysis to be done here. Effects are described qualitatively above in supplementary results.

### 11.11 Effects from Subjective Social Status

SSS was only reported in NCSA-R and these effects are described qualitatively above in supplementary results.

|           | efid | study.ID | n    | IVshort    | DVshort | p.entered | IOR   | IOR.v  |
|-----------|------|----------|------|------------|---------|-----------|-------|--------|
| <b>40</b> | 40   | NCSA     | 6483 | Subjective | Dep.    | IOR       | -0.22 | 0.0012 |
| <b>41</b> | 41   | NCSA     | 6483 | Subjective | Anx.    | IOR       | -0.22 | 9e-04  |
| <b>42</b> | 42   | NCSA     | 6483 | Subjective | DBD     | IOR       | -0.36 | 0.0012 |

These are ORs associated with a one unit increase. The effect is about the same on depression / anxiety and larger on externalizing.

## 12 Figures

We are going to make figures using the ‘forestplot’ library (Gordon & Lumley, 2017).

For some of our plots, we are going to want multiple models displayed per plot. For example, for ‘dichotomous SES on symptoms’ we want all of our SES by symptom models stacked in to one figure, with the same axis. We will need about 9 forest plots, so it will be easier to functionalize this. We need one function (get\_rma\_data) per model (to extract the relevant data from each model and format it for the forestplot function). We need a second function that runs the first on a list of models and combines the returned data frames. A final function actually generates the forestplot. Then we can run each plot very simply with a few lines of code.

### 12.1 Plotting Functions: component models

```
get_rma_data<-function(rmamodel) {
  efids<-as.numeric(levels(rmamodel$mf.r.f[[1]]$efid)) #Get the id numbers of the effects included in the specified model.
  wi <- 1/sqrt(rmamodel$vi) #get a vector of weights
  psize<-wi/sum(wi,na.rm=TRUE) #calculate point size:
  psize<-(psize - min(psize, na.rm = TRUE))/(max(psize,na.rm = TRUE) - min(psize, na.rm = TRUE))
  psize <- (psize * 1) + 0.5
  #build a data frame for this model with all the stuff we want to display:
  df<-with(rmamodel,data.frame(Paper=as.character(esdf[efids,"cite"]), #name of paper
                              Cohort=as.character(esdf[efids,"study.ID"]), #name of Cohort
                              n=as.character(esdf[efids,"n"]), #effect n
                              DV=esdf[efids,"DVshort"], #dependent variable
```

```

        mean=yi, #effect
        lower=yi-1.96*sqrt(vi), #lower CI
        upper=yi+1.96*sqrt(vi), #upper CI
        sum=FALSE, #these are not summary ariables.
        psize=psize, #insert the point size
        stringsAsFactors = FALSE)) #don't factorize
df<-df[order(df$DV),] #order the df by dependent variable
df$DV<-as.character(df$DV) #convert DV back to a string.
pred<-predict(rmamodel) #Get predictions from the model
#Now we use the pred object to get our summary statistics:
rbind(df,data.frame(Paper=c("RE Model","Precision Interval"),
                  Cohort=NA,
                  n=NA,
                  #pwhite=NA,
                  #mage=NA,
                  DV=NA,
                  mean=pred$pred,
                  lower=c(pred$ci.lb,pred$cr.lb),
                  upper=c(pred$ci.ub,pred$cr.ub),
                  sum=TRUE,
                  psize=c(1,.5),
                  stringsAsFactors = FALSE))
}

#output from this function looks like this:
#           Paper Cohort    n          DV      mean      lower      upper      sum      psize
#2      Loeber et al., 1998  PYS.y  503  Depression  0.3533426  0.05564357  0.6510416 FALSE  0.5464616
#3      Loeber et al., 1998  PYS.m  508  Depression  0.2921169 -0.05596824  0.6402019 FALSE  0.5000000
#1          Xue et al., 2005  PHDCN 2805 Internalizing  0.1835472  0.10857459  0.2585197 FALSE  1.5000000
#4  Cohen & Hesselbart, 1993*    CIC  776 Internalizing  0.6897441  0.36173323  1.0177551 FALSE  0.5168000
#5  Cohen & Hesselbart, 1993*    CIC  776 Externalizing  0.4802485  0.15317950  0.8073174 FALSE  0.5176390
#11                RE Model    <NA> <NA>          <NA>  0.3303283  0.14011251  0.5205441  TRUE  1.0000000
#21      Precision Interval    <NA> <NA>          <NA>  0.3303283 -0.02121900  0.6818756  TRUE  0.5000000

get_rmalist_data<-function(mlist,tlist) {
  if(is.na(tlist)) {
    l<-lapply(mlist,get_rma_data) #make sure the input is in the right format
  } else {

```

```

titles<-lapply(tlist,function(x) {data.frame(Paper=x, #generate subtitles
      Cohort=NA,
      n=NA,
      #pwhite=NA,
      #mage=NA,
      DV=NA,
      mean=NA,
      lower=NA,
      upper=NA,
      sum=TRUE,
      psize=FALSE)})
models<-lapply(mlist,get_rma_data) #generate data by iterating get_rma_data across the relevant models
idx<-order(c(seq_along(titles),seq_along(models))) #order by title and then model output
l<-c(titles,models)[idx]
}
df<-do.call("rbind",l)
df
}

c_forestplot<-function(modellist,tlist=NA,para,transfexp=FALSE,...) {
  #Get Data
  plot.Data<-get_rmalist_data(modellist,tlist)

  #Transform if necessary.
  if(transfexp==TRUE) {
    plot.Data[,5:7]<-exp(plot.Data[,5:7])
  }

  #Format the Effect Summary line.
  effectnums<-plot.Data[,5:7]
  effectnums[plot.Data$Paper=="Precision Interval",1]<-NA
  effectnums[!is.na(effectnums$mean),"mchar"]<-numform::f_num(na.omit(effectnums$mean),digits=2)
  effectnums[!is.na(effectnums$lower),"lchar"]<-numform::f_num(na.omit(effectnums$lower),digits=2,p="[")
  effectnums[!is.na(effectnums$upper),"uchar"]<-numform::f_num(na.omit(effectnums$upper),digits=2,s="]")
  effectnums[effectnums$lower < -50 & !is.na(effectnums$lower),"lchar"]<-"<-50.00"
  effectnums[effectnums$upper > 50 & !is.na(effectnums$upper),"uchar"]<-">50.00"
  effectnums[is.na(effectnums)]<-""
  plot.Data$paratext<-with(effectnums,paste(mchar,lchar,uchar,sep=" "))
}

```

```

#Add a header row
headers<-data.frame(Paper="Paper",
                    Cohort="Cohort",
                    n="n",
                    DV="Outcome",
                    mean=NA,
                    lower=NA,
                    upper=NA,
                    sum=TRUE,
                    psize=NA,
                    paratext=paste(para,"[95% CI]",sep=" "),
                    stringsAsFactors = FALSE)

plot.Data<-rbind(headers,plot.Data)

#Build a vector of our point shapes
#This is what makes the PI bar not a diamond.
sumfuncvector<-c(fpDrawBarCI,fpDrawBarCI)
for (i in 1:dim(plot.Data)[1]) {
  if(plot.Data[i,"Paper"]=="Precision Interval") {
    sumfuncvector[[i]]<-fpDrawBarCI
  } else {
    sumfuncvector[[i]]<-fpDrawSummaryCI
  }
}

#Build a list for where we want our lines.
subtitlerows<-which(is.na(plot.Data$lower))
hlineindices<-c(subtitlerows,subtitlerows+1)
hlines<-as.list(rep(TRUE,length(hlineindices)))
names(hlines)<-as.character(hlineindices)

forestplot(plot.Data[,c(1:4,10)],
           mean=plot.Data$mean,
           lower=plot.Data$lower,
           fn.ci_sum=sumfuncvector,
           upper=plot.Data$upper,
           is.summary=plot.Data$sum,
           align=c("l","l","c","l","r"),

```

```

    hrzl_lines = hlines,
    graph.pos=5,
    vertices=TRUE,
    colgap=unit(3,"mm"),
    boxsize=plot.Data$psize*.5,
    txt_gp=fpTxtGp(label=gpar(fontfamily="serif",fontSize="10")),
    graphwidth=unit(5,"cm"),
    mar=unit(rep(0,times=4),"mm"),
    ...) # feed any remaining args to the forestplot function
}

```

## 12.2 Dichotomous SES on symptoms.

The relevant models are:

- m.PEbySymp
- m.PVbySymp
- m.PAbySymp

```

#png("plot-dSESonSymp.png",width=7.5,height=9.5,units="in",res=dpi)
c_forestplot(list(m.PEbySymp,m.PVbySymp,m.PAbySymp),list("Parent Education","Poverty","Public Assistance"),"g",transfexp=FALSE,xlab="Stand

```

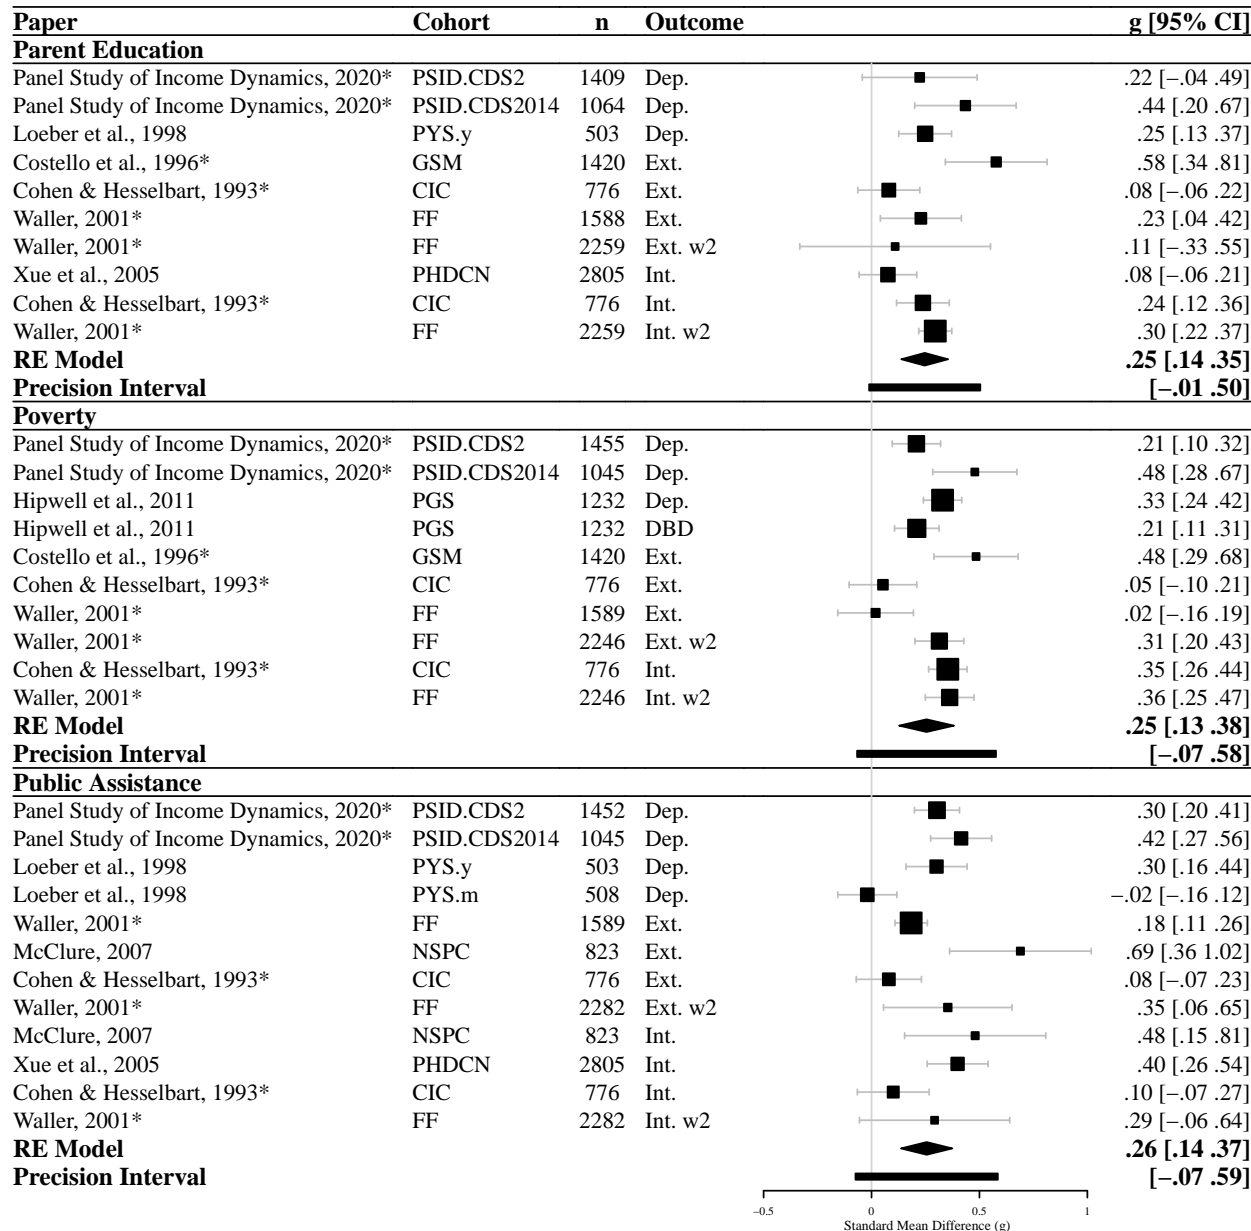

```
#dev.off()
```

### 12.3 Continuous Income on Symptoms

```
#png("plot-inconsymp.png",width=7.5,height=3,units="in",res=dpi)
c_forestplot(modellist=list(m.INCbySymp),
             tlist=NA,
             para="r",
             transfexp = FALSE,
             #title="",
             xlab="Correlation (z)",
             transf=transf.ztor,
             clip=c(-1,.25))
```

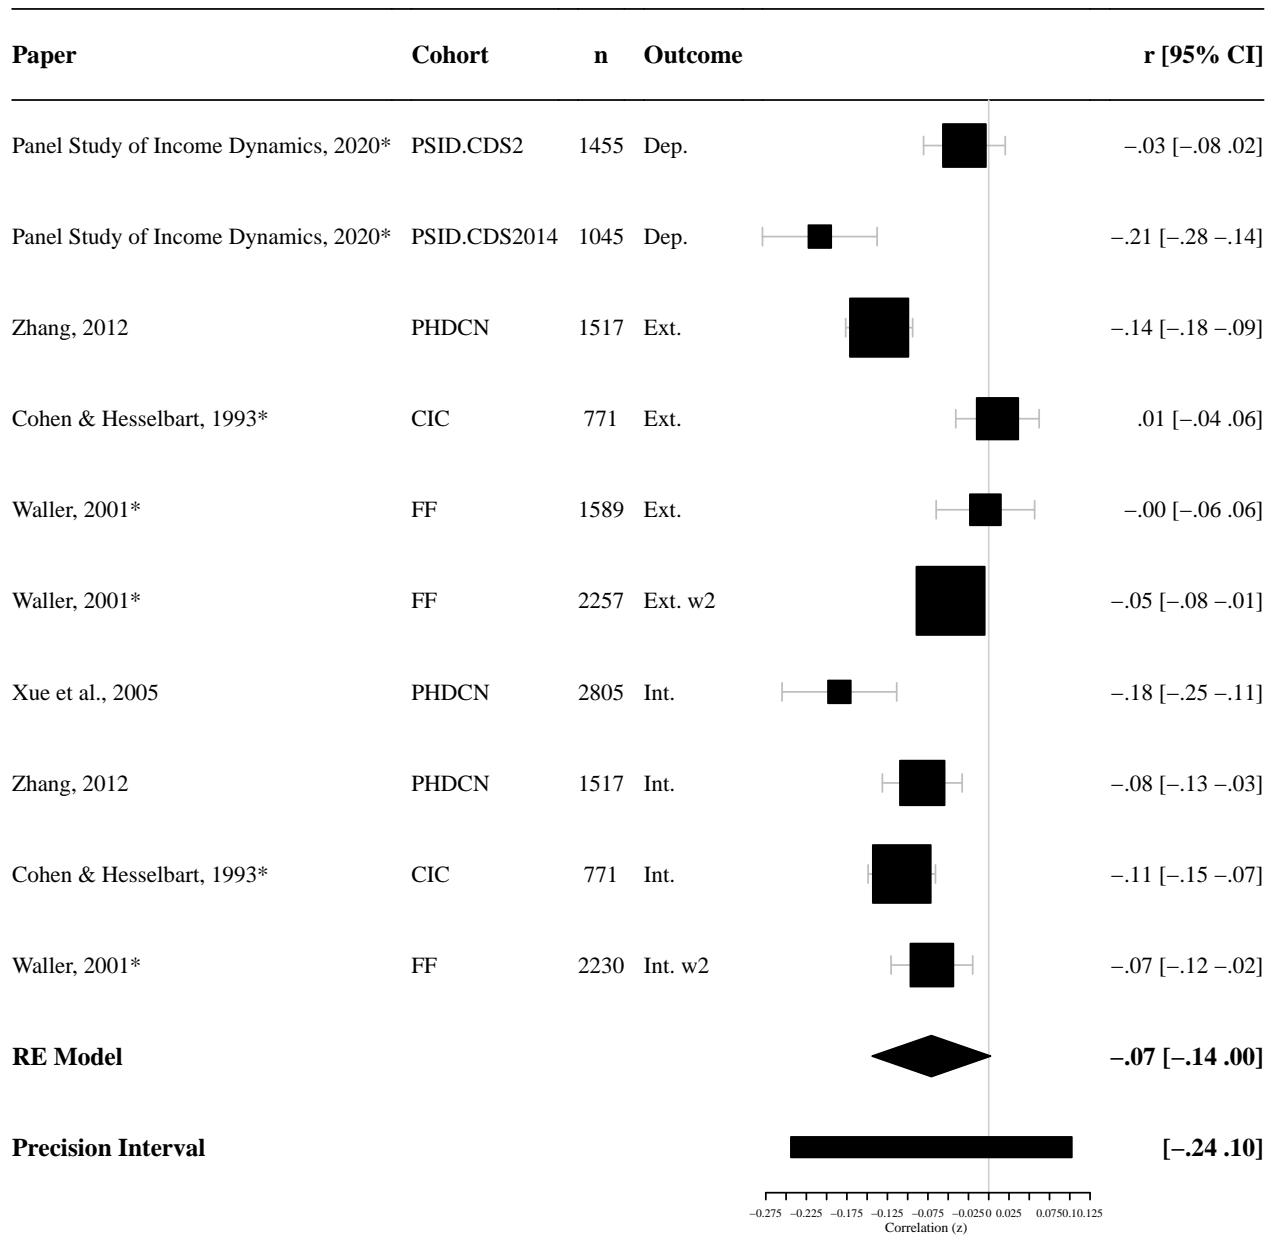



```
#dev.off()
```

## 12.4 Dichotomous SES on disorder.

- m.PEbyDis
- m.PVbyDis
- m.PAbyDis

```
#png("plot-dSESonDis.png",width=7.5,height=9.5,units="in",res=dpi)
c_forestplot(modellist=list(m.PEbyDis,m.PVbyDis,m.PAbyDis),
             tlist=list("Parent Education","Poverty","Public Assistance"),
             para="OR",
             transfexp = TRUE,
             xlab="Odds Ratio (OR)",
             zero=1,
             clip=c(-1,4))
```

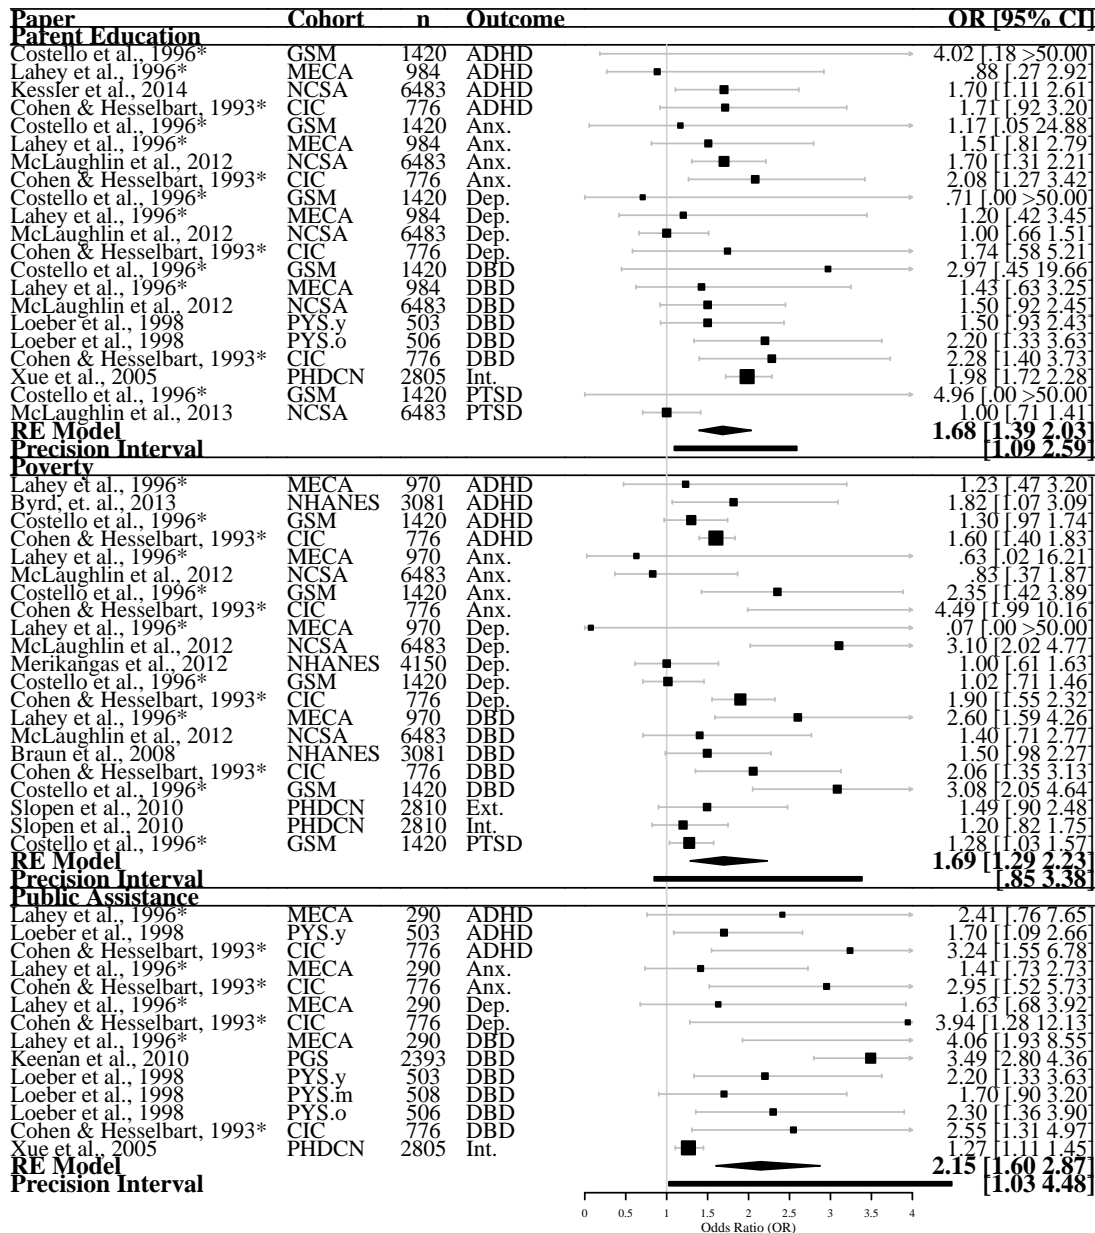

```
#dev.off()
```

## 12.5 SMD in Income with Disorder

```
#png("plot-incondis.svg",width=7.5,height=3,units="in",res=dpi)
c_forestplot(modellist=list(m.INCbyDis),
             tlist=NA,
             para="g",
             transfexp = FALSE,
             #title="Figure 4: SMD in income with disorder",
             xlab="Standard Mean Difference (g)",
             clip=c(-1,.25))
```

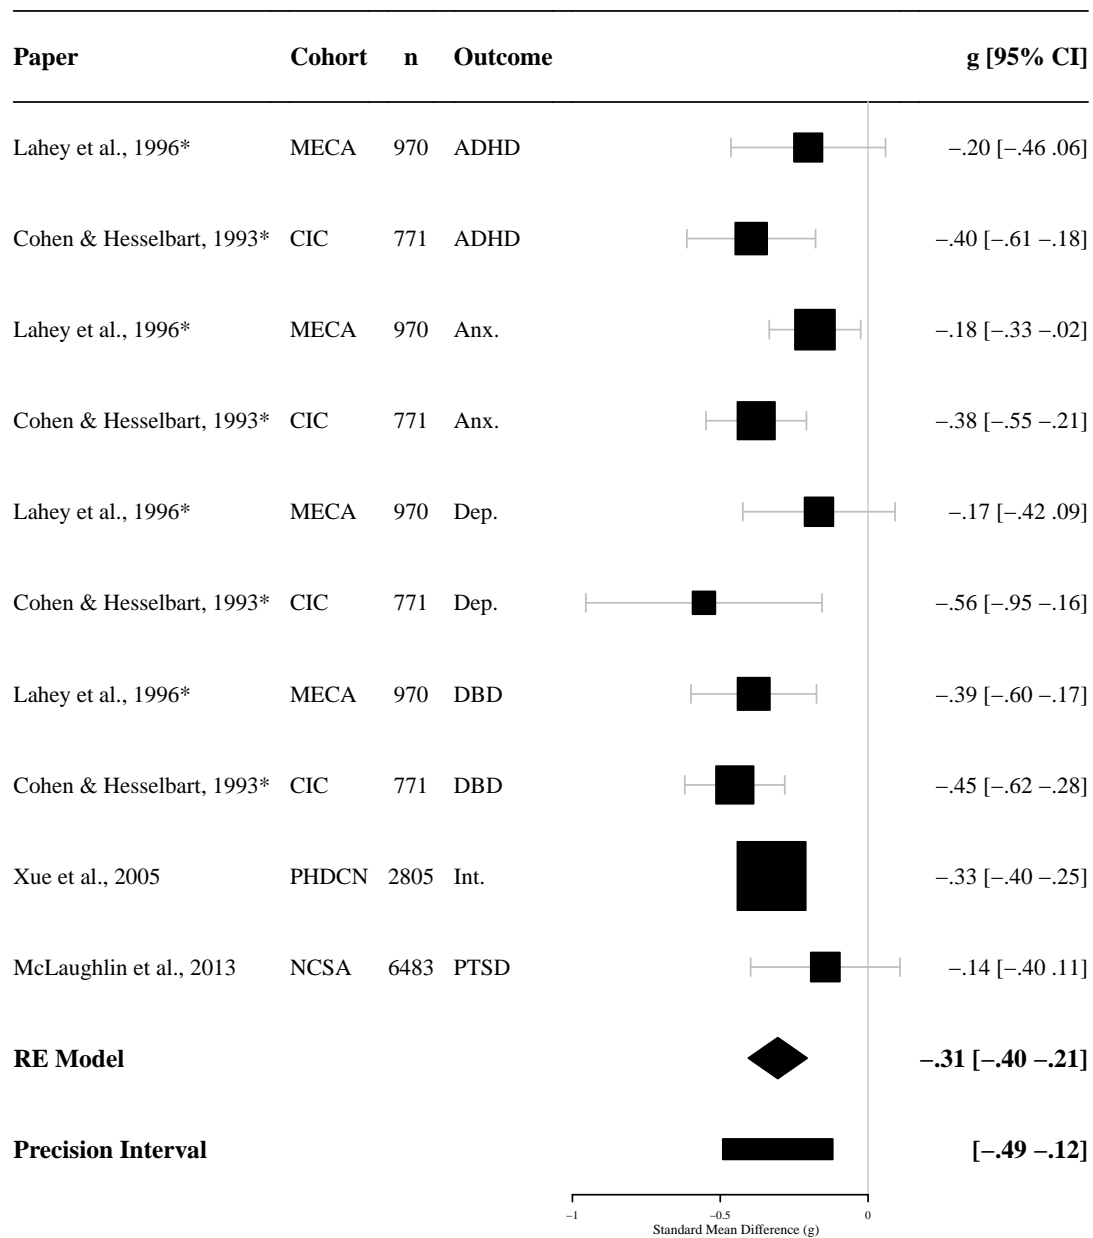

```
#dev.off()
```

## 12.6 Omnibus Plot

Here we have an additional complication of needing our IVs displayed, and needing to split the figure between 3 pages, which means a different function.

### 12.6.1 Plotting Function

```
get_rma_data2<-function(rmamodel) {  
  efids<-as.numeric(as.character(rmamodel$mf.r.f[[1]]$efid)) #Get the id numbers of the effects included in the specified model, supposed  
  wi <- 1/sqrt(rmamodel$vi) #get a vector of weights  
  psize<-wi/sum(wi,na.rm=TRUE) #calculate point size:  
  psize<-(psize - min(psize, na.rm = TRUE))/(max(psize,na.rm = TRUE) - min(psize, na.rm = TRUE))  
  psize <- (psize * 1) + 0.5  
  #build a data frame for this model with all the stuff we want to display:  
  df<-with(rmamodel,data.frame(SES="",  
                               Paper=as.character(esdf[efids,"cite"]), #name of paper  
                               Cohort=as.character(esdf[efids,"study.ID"]), #name of Cohort  
                               n=as.character(esdf[efids,"n"]), #effect n  
                               DV=esdf[efids,"DVshort"], #dependent variable  
                               mean=yi, #effect  
                               lower=yi-1.96*sqrt(vi), #lower CI  
                               upper=yi+1.96*sqrt(vi), #upper CI  
                               sum=FALSE, #these are not summary ariables.  
                               psize=psize, #insert the point size  
                               stringsAsFactors = FALSE)) #don't factorize  
  esdf$IVshort<-factor(esdf$IVshort,levels=c("Hollingshead","Parent Ed.,"Income","Assistance","Poverty","Subjective"))  
  df<-df[order(esdf[efids,"IVshort"],esdf[efids,"Externalizing"],df$DV),] #order the df by dependent variable  
  df$DV<-as.character(df$DV) #convert DV back to a string.  
  pred<-predict(rmamodel) #Get predictions from the model  
  #Now we use the pred object to get our summary statistics:  
  rbind(df,data.frame(SES=NA,  
                     Paper=c("Summary","Precision Interval"),  
                     Cohort=NA,  
                     n=NA,  
                     #pwhite=NA,  
                     #mage=NA,  
                     #IV=NA,
```

```

        DV=NA,
        mean=pred$pred,
        lower=c(pred$ci.lb,pred$cr.lb),
        upper=c(pred$ci.ub,pred$cr.ub),
        sum=TRUE,
        psize=c(1,.5),
        stringsAsFactors = FALSE))
}

get_rmalist_data2<-function(mlist,tlist) {
  if(is.na(tlist)) {
    l<-lapply(mlist,get_rma_data2) #make sure the input is in the right format
  } else {
    titles<-lapply(tlist,function(x) {data.frame(SES=NA,
                                                Paper=x, #generate subtitles
                                                Cohort=NA,
                                                n=NA,
                                                #pwhite=NA,
                                                #mage=NA,
                                                DV=NA,
                                                mean=NA,
                                                lower=NA,
                                                upper=NA,
                                                sum=TRUE,
                                                psize=FALSE)})
    models<-lapply(mlist,get_rma_data2) #generate data by iterating get_rma_data across the relevant models
    idx<-order(c(seq_along(titles),seq_along(models))) #order by title and then model output
    l<-(c(titles,models))[idx]
  }
  df<-do.call("rbind",l)
  df$Paper<-gsub('*', "a",df$Paper,fixed=TRUE)
  df
}

c_forestplot2<-function(modellist,tlist=NA,para,transfexp=FALSE,plottedrows=NULL,summarylines=FALSE,...) {
  #Get Data
  plot.Data<-get_rmalist_data2(modellist,tlist)

```

```

#Transform if necessary.
if(transfexp==TRUE) {
  plot.Data[,6:8]<-exp(plot.Data[,6:8])
}

#Format the Effect Summary line.
effectnums<-plot.Data[,6:8]
effectnums[plot.Data$Paper=="Precision Interval",1]<-NA
effectnums[!is.na(effectnums$mean), "mchar"]<-numform::f_num(na.omit(effectnums$mean), digits=2)
effectnums[!is.na(effectnums$lower), "lchar"]<-numform::f_num(na.omit(effectnums$lower), digits=2, p="[")
effectnums[!is.na(effectnums$upper), "uchar"]<-numform::f_num(na.omit(effectnums$upper), digits=2, s="]")
effectnums[effectnums$lower < -50 & !is.na(effectnums$lower), "lchar"]<- "[<-50.00"
effectnums[effectnums$upper > 50 & !is.na(effectnums$upper), "uchar"]<- ">50.00]"
effectnums[is.na(effectnums)]<-""
plot.Data$paratext<-with(effectnums, paste(mchar, lchar, uchar, sep=" "))

#Add a header row
headers<-data.frame(SES="SES",
                    Paper="Paper",
                    Cohort="Cohort",
                    n="n",
                    #mage="Age",
                    #pwhite="White",
                    DV="Outcome",
                    mean=NA,
                    lower=NA,
                    upper=NA,
                    sum=TRUE,
                    psize=NA,
                    paratext=paste("g", "[95% CI]", sep=" "), # always "g"
                    stringsAsFactors = FALSE)

if(is.null(plottedrows)) {
  plot.Data<-rbind(headers, plot.Data)
} else {
  plot.Data<-rbind(headers, plot.Data[plottedrows,])
}

```

```

#Build a vector of our point shapes
sumfuncvector<-c(fpDrawBarCI,fpDrawBarCI)
for (i in 1:dim(plot.Data)[1]) {
  if(plot.Data[i,"Paper"]=="Precision Interval") {
    sumfuncvector[[i]]<-fpDrawBarCI
  } else {
    sumfuncvector[[i]]<-fpDrawSummaryCI
  }
}

#Build a list for where we want our lines.
hlineindices<-c(1,2) #above and below first line.
if(summarylines) { #line below the last line and below the 3rd to last line.
  hlineindices<-c(hlineindices,dim(plot.Data)[1]-1,dim(plot.Data)[1]+1)
}
hlines<-as.list(rep(TRUE,length(hlineindices)))
names(hlines)<-as.character(hlineindices)
hlines
forestplot(plot.Data[,c(1:5,11)],
  mean=plot.Data$mean,
  lower=plot.Data$lower,
  fn.ci_sum=sumfuncvector,
  upper=plot.Data$upper,
  is.summary=plot.Data$sum,
  align=c("l","l","c","l","l","r"),
  hrzl_lines = hlines,
  graph.pos=6,
  vertices=TRUE,
  colgap=unit(3,"mm"),
  boxsize=plot.Data$psize*.5,
  txt_gp=fpTxtGp(label=gpar(fontfamily="sans",fontsize="9"),
    xlab=gpar(fontfamily="sans",cex="1"),
    ticks=gpar(fontfamily="sans",cex="1")),
  graphwidth=unit(10,"cm"),
  mar=unit(rep(0,times=4),"mm"),
  ...) # feed any remaining args to the forestplot function
}

```



## 12.6.2 Call

See figure 2 in paper for output: SES labels and shading, as well as interpretative axis labels, were added in a vector graphics program.

```
svg("plot-kitchen1.svg",width=10,height=7.25,bg=NA)
c_forestplot2(modellist=list(m.combined),
              tlist=NA,
              para="gcor",
              transfexp = FALSE,
              #title="Figure 4: SMD in income with disorder",
              xlab="Standard Mean Difference (g)",
              clip=c(-.5,1),
              plottedrows = 1:40,
              )
dev.off()
```

```
## pdf
## 2
```

```
svg("plot-kitchen2.svg",width=10,height=7.25,bg=NA)
c_forestplot2(modellist=list(m.combined),
              tlist=NA,
              para="gcor",
              transfexp = FALSE,
              #title="Figure 4: SMD in income with disorder",
              xlab="Standard Mean Difference (g)",
              clip=c(-.5,1),
              plottedrows = 41:86,
              xticks=c(-.5,0,.5,1)
              #summarylines=TRUE
              )
dev.off()
```

```
## pdf
## 2
```

```
svg("plot-kitchen3.svg",width=10,height=7.25,bg=NA)
c_forestplot2(modellist=list(m.combined),
              tlist=NA,
              para="gcor",
              transfexp = FALSE,
```

```

    #title="Figure 4: SMD in income with disorder",
    xlab="Standard Mean Difference (g)",
    clip=c(-.5,1),
    plottedrows = 87:122,
    summarylines=TRUE
  )
dev.off()

```

```

## pdf
## 2

```

## 12.7 Moderation Plot

Now we are plotting predictions generated by our final model. See figure 3 in the paper for output.

### 12.7.1 Plotting Function

```

finalpredict<-as.data.frame(predict(m.combined.intext.IV))
#finalpredict<-as.data.frame(predict(m.ml.combined.intext.IVint))
finalpredict$IV<-esdf$IV
finalpredict$Externalizing<-esdf$Externalizing

uniquepredict<-as.data.frame(finalpredict %>% group_by_all %>% count)

modforesttabledat<-uniquepredict[order(uniquepredict$IV,uniquepredict$Externalizing),c(8,7,9,1,2,3,4,5,6)]
modforesttable<-data.frame(IV=modforesttabledat$IV,
  Externalizing=modforesttabledat$Externalizing,
  k=modforesttabledat$n,
  mean=modforesttabledat$pred,
  lower=modforesttabledat$ci.lb,
  upper=modforesttabledat$ci.ub)

modforesttable$Externalizing<-factor(modforesttable$Externalizing,labels=c("Internalizing","Externalizing"))

forestplotmods<-function(table,plottedrows=NULL,...) {
  #Get Data
  plot.Data<-table

  #Format the Effect Summary line.

```

```

effectnums<-plot.Data[,4:6]
effectnums[!is.na(effectnums$mean), "mchar"]<-numform::f_num(na.omit(effectnums$mean), digits=2)
effectnums[!is.na(effectnums$lower), "lchar"]<-numform::f_num(na.omit(effectnums$lower), digits=2, p="[" )
effectnums[!is.na(effectnums$upper), "uchar"]<-numform::f_num(na.omit(effectnums$upper), digits=2, s="]")
effectnums[effectnums$lower < -50 & !is.na(effectnums$lower), "lchar"]<- "[<-50.00"
effectnums[effectnums$upper > 50 & !is.na(effectnums$upper), "uchar"]<- ">50.00]"
effectnums[is.na(effectnums)]<-""
plot.Data$paratext<-with(effectnums, paste(mchar, lchar, uchar, sep=" "))
#Add a header row
headers<-data.frame(IV="SES Measure",
                    Externalizing="Psychopathology Type",
                    k="k",
                    mean=NA,
                    lower=NA,
                    upper=NA,
                    paratext=paste("g", "[95% CI]", sep=" "), # just g
                    stringsAsFactors = FALSE)

if(is.null(plottedrows)) {
  plot.Data<-rbind(headers, plot.Data)
} else {
  plot.Data<-rbind(headers, plot.Data[plottedrows,])
}

#Build a list for where we want our lines.
hlineindices<-c(1,2,dim(plot.Data)[1]+1) #above and below first line, after last line.
hlines<-as.list(rep(TRUE,length(hlineindices)))
names(hlines)<-as.character(hlineindices)

forestplot(plot.Data[,c(1:3,7)],
           mean=plot.Data$mean,
           lower=plot.Data$lower,
           fn.ci_norm=function(...) {fpDrawSummaryCI(col="black",...)},
           #fn.ci_sum = sumfuncvector,
           upper=plot.Data$upper,
           is.summary=c(TRUE,rep(FALSE,24)),
           align=c("l","l","r","r"),
           hrzl_lines = hlines,

```

```

graph.pos=4,
vertices=TRUE,
colgap=unit(3,"mm"),
boxsize=.5,
txt_gp=fpTxtGp(label=gpar(fontfamily="sans",fontsize="10"),
                xlab=gpar(fontfamily="sans",cex="1"),
                ticks=gpar(fontfamily="sans",cex="1")),
graphwidth=unit(8,"cm"),
mar=unit(rep(0,times=4),"mm"),
...) # feed any remaining args to the forestplot function
}

```

## 12.7.2 Call

```

svg("plot-mods.svg",width=9.25,height=4,bg=NA)
forestplotmods(modforesttable,
               para="gcor",
               transfexp = FALSE,
               #title="Figure 4: SMD in income with disorder",
               xlab="Standard Mean Difference (g)",
               clip=c(-.1,.7)
               )
dev.off()

```

```

## pdf
## 2

```

# 13 Tables

## 13.1 Table functions

```

stats_rma.mv<-function(m,form,transf=NA) {
  predict<-predict(m,transf=transf)
  confint<-confint(m,transf=transf)
  df<-data.frame(estimate=predict$pred,
                 k=m$k,
                 ci.lb=predict$ci.lb,
                 ci.ub=predict$ci.ub,

```

```

    pi.lb=predict$cr.lb,
    pi.ub=predict$cr.ub,
    pval=m$pval,
    sigma2.between=m$sigma2[1],
    sigma2.between.lb=confint[[1]]$random[1,2],
    sigma2.between.ub=confint[[1]]$random[1,3],
    sigma2.within=m$sigma2[2],
    sigma2.within.lb=confint[[2]]$random[1,2],
    sigma2.within.ub=confint[[2]]$random[1,3],
    Q=m$QE,
    Qp=m$QEp)
df
}

ci_format<-function(est,low,upp,digitsnum=2) {
  gsub("NA ", "", paste(numform::f_num(est,digits=digitsnum,zero=0),
    numform::f_num(low,digits=digitsnum,p=" [",zero=0),
    numform::f_num(upp,digits=digitsnum,p=" ",s="]",zero=0),sep=""))
}

p_format<-function(p) {
  if(p<.001) {
    "<.001"
  }
  else {
    numform::f_num(p,digits=3)
  }
}

ps_format<-function(v) {
  sapply(v,p_format)
}

starPs<-function(p,s3=.001,s2=.01,s1=.05) {
  sapply(p,function(x) if(x<=s3) {
    '***'
  } else if(x<=s2) {

```

```

    '***'
  } else if(x<=s1) {
    '*'
  } else {""}
}

```

## 13.2 Bivariate Models (Table 1)

```

modelstatslist<-list(stats_rma.mv(m.combined,formula(gcor~I(1/n))),
                    stats_rma.mv(m.PEbySymp,formula(g~I(1/n))),
                    stats_rma.mv(m.PVbySymp,formula(g~I(1/n))),
                    stats_rma.mv(m.PAbySymp,formula(g~I(1/n))),
                    stats_rma.mv(m.PEbyDis,formula(lOR~I(1/n)),transf=exp),
                    stats_rma.mv(m.PVbyDis,formula(lOR~I(1/n)),transf=exp),
                    stats_rma.mv(m.PAbyDis,formula(lOR~I(1/n)),transf=exp),
                    stats_rma.mv(m.INCbySymp,formula(Zr~I(1/n)),transf=transf.ztor),
                    stats_rma.mv(m.INCbyDis,formula(g~I(1/n))),
                    stats_rma.mv(m.HollbySymp,formula(Zr~I(1/n))))

modelstatsdf<-as.data.frame(t(sapply(modelstatslist,rbind)))
modeltable<-with(modelstatsdf,data.frame(Model=c("Bivariate Model",
                                                "Parent Ed. on Symptoms",
                                                "Poverty on Symptoms",
                                                "Public Assistance on Symptoms",
                                                "Parent Ed. on Disorder",
                                                "Poverty on Disorder",
                                                "Public Assistance on Disorder",
                                                "Income with Symptoms",
                                                "Disorder on Income",
                                                "Hollingshead on Symptoms"),
Parameter=c(rep("g",4),
             rep("lOR",3),
             "r",
             rep("g",2)),
k=unlist(k),
est=ci_format(estimate,ci.lb,ci.ub),
p=ps_format(unlist(pval)),
PI=ci_format(" ",pi.lb,pi.ub),

```

```

sigma2.between=ci_format(sigma2.between,sigma2.between.lb,sigma2.between.ub,digitsnum=3),
sigma2.within=ci_format(sigma2.within,sigma2.within.lb,sigma2.within.ub,digitsnum=3),
Qest=numform::f_num(unlist(Q),digits=2,zero=0),
Qpval=ps_format(unlist(Qp))
)
)

```

```
pander(modeltable)
```

| Model                         | Parameter | k   | est              | p     | PI          | sigma2.between   | sigma2.within    | Qest   | Qpval |
|-------------------------------|-----------|-----|------------------|-------|-------------|------------------|------------------|--------|-------|
| Bivariate Model               | g         | 120 | .25 [.18,.32]    | <.001 | [-.05,.55]  | .016 [.007,.040] | .007 [.004,.012] | 497.17 | <.001 |
| Parent Ed. on Symptoms        | g         | 10  | .25 [.14,.35]    | <.001 | [-.01,.50]  | .011 [0,.076]    | .003 [0,.041]    | 23.48  | .005  |
| Poverty on Symptoms           | g         | 10  | .25 [.13,.38]    | <.001 | [-.07,.58]  | .019 [0,.125]    | .004 [0,.042]    | 34.22  | <.001 |
| Public Assistance on Symptoms | g         | 12  | .26 [.14,.37]    | <.001 | [-.07,.59]  | .014 [0,.090]    | .011 [0,.066]    | 45.83  | <.001 |
| Parent Ed. on Disorder        | IOR       | 21  | 1.68 [1.39,2.03] | <.001 | [1.09,2.59] | .023 [0,.206]    | .016 [0,.113]    | 25.98  | .166  |
| Poverty on Disorder           | IOR       | 21  | 1.69 [1.29,2.23] | <.001 | [.85,3.38]  | .104 [.026,.553] | .002 [0,.055]    | 57.43  | <.001 |
| Public Assistance on Disorder | IOR       | 14  | 2.15 [1.60,2.87] | <.001 | [1.03,4.48] | .118 [0,.532]    | .001 [0,.293]    | 74.81  | <.001 |
| Income with Symptoms          | r         | 10  | -.07 [-.14,0]    | .057  | [-.24,.10]  | .006 [.002,.042] | 0 [0,.002]       | 54.42  | <.001 |
| Disorder on Income            | g         | 10  | -.31 [-.40,-.21] | <.001 | [-.49,-.12] | .006 [0,.100]    | 0 [0,.017]       | 12.12  | .207  |
| Hollingshead on Symptoms      | g         | 5   | -.09 [-.22,.04]  | .172  | [-.34,.16]  | .010 [0,.209]    | .002 [0,.040]    | 31.51  | <.001 |

```
write.csv(modeltable,file="modelstable.csv")
```

### 13.3 Moderation (Table 2)

```

modafunction<-function(rmmod) {
  summ<-summary(rmmod)
}

```

```

return(c(numform::f_num(summ$QM,digits=2),
      summ$m,
      p_format(summ$QMp),
      starPs(summ$QMp)))
}
modmodels<-list(m.combined.intext.IV)
modmodelslabel<-c("Multiple Moderation")
modtablea<-data.frame(t(sapply(lapply(modmodels,modafunction),cbind)),row.names=modmodelslabel)
colnames(modtablea)<-c("QM","df","p","star")

modtableb<-rbind(sapply(summary(m.combined.intext.IV)[2:7],cbind))
row.names(modtableb)<-c(row.names(summary(m.combined.intext.IV)$b))
modtableb<-as.data.frame(modtableb)
modtableb$stars<-starPs(modtableb$pval)
modtableb$dash<-"-"

pander(modtableb[,c(1,7,2,3,4,5,8,6)],"modtableB.csv")

```

Table 44: modtableB.csv

|                            | beta  | stars | se    | zval | pval    | ci.lb   | dash | ci.ub |
|----------------------------|-------|-------|-------|------|---------|---------|------|-------|
| <b>intrcpt</b>             | 0.16  | ***   | 0.045 | 3.7  | 0.00026 | 0.076   | â€œ  | 0.25  |
| <b>IVshortHollingshead</b> | 0.022 |       | 0.068 | 0.32 | 0.75    | -0.11   | â€œ  | 0.16  |
| <b>IVshortParent Ed.</b>   | 0.063 |       | 0.037 | 1.7  | 0.088   | -0.0093 | â€œ  | 0.14  |
| <b>IVshortPoverty</b>      | 0.058 |       | 0.035 | 1.6  | 0.1     | -0.011  | â€œ  | 0.13  |
| <b>IVshortAssistance</b>   | 0.13  | ***   | 0.038 | 3.4  | 0.00067 | 0.054   | â€œ  | 0.2   |
| <b>IVshortSubjective</b>   | 0.049 |       | 0.067 | 0.72 | 0.47    | -0.084  | â€œ  | 0.18  |
| <b>ExternalizingTRUE</b>   | 0.056 | *     | 0.026 | 2.2  | 0.03    | 0.0053  | â€œ  | 0.11  |

```
write.csv(modtableb[,c(1,7,2,3,4,5,8,6)],"modtableB.csv")
```

## 14 Supplemental Analyses

### 14.1 Interaction Model

We interpreted a two-moderator model without interaction as the final model, but the model fit statistics were somewhat ambiguous. The interaction model is presented below:



```
m.combined.intext.IVint<-rma.mv(yi=gcor,
                                V=g.v,
                                mods= ~ IVshort*Externalizing,
                                random=~1 | study.ID/efid,
                                slab=paste(study.ID, efid,Externalizing,sep=" "),
                                data=esdf
                                )
```

```
summary(m.combined.intext.IVint)
```

```
##
## Multivariate Meta-Analysis Model (k = 120; method: REML)
##
##   logLik Deviance      AIC      BIC      AICc
##  43.7452 -87.4903 -59.4903 -21.9405 -54.9742
##
## Variance Components:
##
##           estim  sqrt  nlvls  fixed      factor
## sigma^2.1  0.0156  0.1247   16     no      study.ID
## sigma^2.2  0.0045  0.0669  120     no  study.ID/efid
##
## Test for Residual Heterogeneity:
## QE(df = 108) = 334.7176, p-val < .0001
##
## Test of Moderators (coefficient(s) 2:12):
## QM(df = 11) = 30.6764, p-val = 0.0012
##
## Model Results:
##
##           estimate      se      zval      pval
## intrcpt           0.1784  0.0464   3.8466  0.0001
## IVshortHollingshead -0.0167  0.0825  -0.2028  0.8393
## IVshortParent Ed.    0.0836  0.0427   1.9597  0.0500
## IVshortPoverty       0.0467  0.0427   1.0935  0.2742
## IVshortAssistance    0.0548  0.0445   1.2317  0.2181
## IVshortSubjective    0.0337  0.0705   0.4774  0.6331
## ExternalizingTRUE    0.0072  0.0470   0.1538  0.8778
## IVshortHollingshead:ExternalizingTRUE  0.0959  0.0998   0.9613  0.3364
```

```

## IVshortParent Ed.:ExternalizingTRUE      -0.0458  0.0692  -0.6614  0.5083
## IVshortPoverty:ExternalizingTRUE          0.0422  0.0628   0.6727  0.5011
## IVshortAssistance:ExternalizingTRUE       0.1770  0.0687   2.5782  0.0099
## IVshortSubjective:ExternalizingTRUE       0.0664  0.0972   0.6830  0.4946
##                                           ci.lb  ci.ub
## intrcpt                                  0.0875  0.2694  ***
## IVshortHollingshead                     -0.1784  0.1449
## IVshortParent Ed.                       -0.0000  0.1672  .
## IVshortPoverty                           -0.0370  0.1304
## IVshortAssistance                        -0.0324  0.1419
## IVshortSubjective                        -0.1045  0.1718
## ExternalizingTRUE                        -0.0850  0.0994
## IVshortHollingshead:ExternalizingTRUE    -0.0997  0.2915
## IVshortParent Ed.:ExternalizingTRUE     -0.1814  0.0899
## IVshortPoverty:ExternalizingTRUE        -0.0808  0.1653
## IVshortAssistance:ExternalizingTRUE      0.0424  0.3115  **
## IVshortSubjective:ExternalizingTRUE     -0.1241  0.2569
##
## ---
## Signif. codes:  0 '***' 0.001 '**' 0.01 '*' 0.05 '.' 0.1 ' ' 1

```

A prediction plot can be generated using the same procedure as in the moderation plot above:

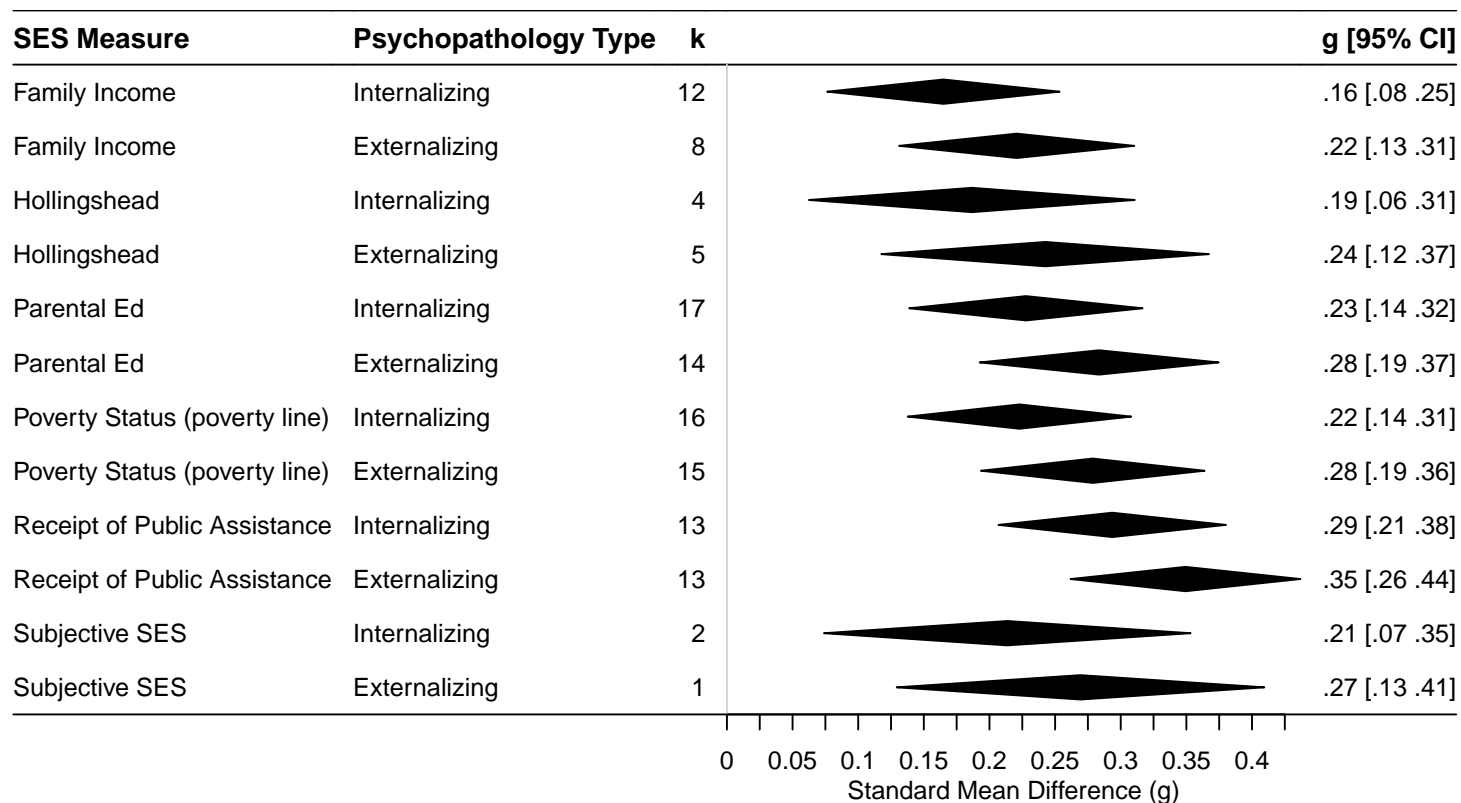

Over-all, the pattern is that the association of externalizing with public assistance is especially strong, which is in line with our points in the discussion that public assistance is highly related to material hardship, and that hardship is especially likely to relate to externalizing problems.

## 14.2 Sensitivity analysis.

### 14.2.1 Further Covariance Sensitivity Tests

We performed sensitivity tests using an imputed correlation between effects. Here we'll compare a model using our covariance matrix with some more arbitrarily chosen values. For example, in the code: `V=with(esdf,clubSandwich::impute_covariance_matrix(g.v,study.ID,.1))`, the trailing '.1' represents an estimated correlation of .1 between effects from the same cohort.

```
m.combined.intext.IV
```

```
##
```

```

## Multivariate Meta-Analysis Model (k = 120; method: REML)
##
## Variance Components:
##
##      estim      sqrt  nlvls  fixed      factor
## sigma^2.1  0.0151  0.1228    16     no      study.ID
## sigma^2.2  0.0058  0.0761   120     no  study.ID/efid
##
## Test for Residual Heterogeneity:
## QE(df = 113) = 367.6400, p-val < .0001
##
## Test of Moderators (coefficient(s) 2:7):
## QM(df = 6) = 17.7472, p-val = 0.0069
##
## Model Results:
##
##      estimate      se      zval      pval      ci.lb      ci.ub
## intrcpt          0.1649  0.0452  3.6518  0.0003  0.0764  0.2534 ***
## IVshortHollingshead  0.0217  0.0683  0.3171  0.7512 -0.1122  0.1556
## IVshortParent Ed.    0.0628  0.0368  1.7061  0.0880 -0.0093  0.1350 .
## IVshortPoverty       0.0579  0.0352  1.6461  0.0998 -0.0111  0.1269 .
## IVshortAssistance    0.1286  0.0378  3.4015  0.0007  0.0545  0.2027 ***
## IVshortSubjective    0.0486  0.0675  0.7209  0.4710 -0.0836  0.1809
## ExternalizingTRUE    0.0558  0.0258  2.1668  0.0302  0.0053  0.1063 *
##
## ---
## Signif. codes:  0 '***' 0.001 '**' 0.01 '*' 0.05 '.' 0.1 ' ' 1

```

```

rma.mv(yi=gcor,
      mods = ~IVshort + Externalizing,
      V=with(esdf,clubSandwich::impute_covariance_matrix(g.v,study.ID,.1)),

      random=~1 | study.ID/efid,
      slab=paste(study.ID, efid,sep=" "),
      data=esdf
    )

```

```

##
## Multivariate Meta-Analysis Model (k = 120; method: REML)
##

```

```

## Variance Components:
##
##      estim  sqrt  nlvls  fixed      factor
## sigma^2.1 0.0141 0.1188   16     no      study.ID
## sigma^2.2 0.0061 0.0782  120     no  study.ID/efid
##
## Test for Residual Heterogeneity:
## QE(df = 113) = 314.8110, p-val < .0001
##
## Test of Moderators (coefficient(s) 2:7):
## QM(df = 6) = 17.8333, p-val = 0.0067
##
## Model Results:
##
##      estimate      se    zval    pval    ci.lb    ci.ub
## intrcpt          0.1660 0.0446  3.7200 0.0002  0.0785  0.2534 ***
## IVshortHollingshead 0.0201 0.0673  0.2982 0.7655 -0.1118  0.1519
## IVshortParent Ed.   0.0596 0.0367  1.6257 0.1040 -0.0123  0.1316
## IVshortPoverty      0.0567 0.0350  1.6193 0.1054 -0.0119  0.1252
## IVshortAssistance   0.1275 0.0378  3.3740 0.0007  0.0534  0.2016 ***
## IVshortSubjective   0.0394 0.0713  0.5528 0.5804 -0.1004  0.1792
## ExternalizingTRUE   0.0566 0.0255  2.2198 0.0264  0.0066  0.1065  *
##
## ---
## Signif. codes:  0 '***' 0.001 '**' 0.01 '*' 0.05 '.' 0.1 ' ' 1

```

```

rma.mv(yi=gcor,
      mods = ~IVshort + Externalizing,
      V=with(esdf,clubSandwich::impute_covariance_matrix(g.v,study.ID,.23)),

      random=~1 | study.ID/efid,
      slab=paste(study.ID, efid,sep=" "),
      data=esdf
    )

```

```

##
## Multivariate Meta-Analysis Model (k = 120; method: REML)
##
## Variance Components:
##

```

```

##          estim  sqrt  nlvls  fixed      factor
## sigma^2.1 0.0133 0.1153    16     no      study.ID
## sigma^2.2 0.0066 0.0811   120     no  study.ID/efid
##
## Test for Residual Heterogeneity:
## QE(df = 113) = 321.0608, p-val < .0001
##
## Test of Moderators (coefficient(s) 2:7):
## QM(df = 6) = 18.2001, p-val = 0.0058
##
## Model Results:
##
##          estimate      se    zval    pval    ci.lb    ci.ub
## intrcpt          0.1677 0.0442  3.7967 0.0001  0.0811  0.2543 ***
## IVshortHollingshead 0.0184 0.0661  0.2782 0.7808 -0.1111  0.1479
## IVshortParent Ed.   0.0559 0.0365  1.5328 0.1253 -0.0156  0.1273
## IVshortPoverty      0.0553 0.0347  1.5922 0.1113 -0.0128  0.1233
## IVshortAssistance   0.1272 0.0377  3.3708 0.0007  0.0532  0.2011 ***
## IVshortSubjective   0.0291 0.0754  0.3854 0.6999 -0.1188  0.1769
## ExternalizingTRUE   0.0571 0.0251  2.2749 0.0229  0.0079  0.1064 *
##
## ---
## Signif. codes:  0 '***' 0.001 '**' 0.01 '*' 0.05 '.' 0.1 ' ' 1

rma.mv(yi=gcov,
      mods = ~IVshort + Externalizing,
      V=with(esdf,clubSandwich::impute_covariance_matrix(g.v,study.ID,coresthgh)),

      random=~1 | study.ID/efid,
      slab=paste(study.ID, efid,sep=" "),
      data=esdf
    )

##
## Multivariate Meta-Analysis Model (k = 120; method: REML)
##
## Variance Components:
##
##          estim  sqrt  nlvls  fixed      factor
## sigma^2.1 0.0130 0.1142    16     no      study.ID

```

```

## sigma^2.2 0.0068 0.0823 120 no study.ID/efid
##
## Test for Residual Heterogeneity:
## QE(df = 113) = 331.5183, p-val < .0001
##
## Test of Moderators (coefficient(s) 2:7):
## QM(df = 6) = 18.4022, p-val = 0.0053
##
## Model Results:
##
##          estimate      se    zval    pval    ci.lb    ci.ub
## intrcpt          0.1685 0.0441  3.8253 0.0001  0.0822  0.2549 ***
## IVshortHollingshead 0.0179 0.0656  0.2721 0.7855 -0.1108  0.1465
## IVshortParent Ed.   0.0544 0.0364  1.4960 0.1347 -0.0169  0.1256
## IVshortPoverty      0.0548 0.0346  1.5822 0.1136 -0.0131  0.1226
## IVshortAssistance   0.1273 0.0377  3.3761 0.0007  0.0534  0.2011 ***
## IVshortSubjective  0.0253 0.0769  0.3294 0.7418 -0.1254  0.1760
## ExternalizingTRUE   0.0573 0.0250  2.2940 0.0218  0.0083  0.1062 *
##
## ---
## Signif. codes:  0 '***' 0.001 '**' 0.01 '*' 0.05 '.' 0.1 ' ' 1

```

```

rma.mv(yi=gcov,
  mods = ~IVshort + Externalizing,
  V=with(esdf,clubSandwich::impute_covariance_matrix(g.v,study.ID,.3)),

  random=~1 | study.ID/efid,
  slab=paste(study.ID, efid,sep=" "),
  data=esdf
)

```

```

##
## Multivariate Meta-Analysis Model (k = 120; method: REML)
##
## Variance Components:
##
##          estim    sqrt  nlvls  fixed      factor
## sigma^2.1 0.0130 0.1138    16    no      study.ID
## sigma^2.2 0.0068 0.0828   120    no  study.ID/efid
##

```

```

## Test for Residual Heterogeneity:
## QE(df = 113) = 335.9476, p-val < .0001
##
## Test of Moderators (coefficient(s) 2:7):
## QM(df = 6) = 18.4760, p-val = 0.0051
##
## Model Results:
##
##              estimate      se    zval    pval    ci.lb    ci.ub
## intrcpt           0.1688  0.0440  3.8347  0.0001   0.0825  0.2551 ***
## IVshortHollingshead 0.0177  0.0655  0.2703  0.7869  -0.1106  0.1460
## IVshortParent Ed.   0.0539  0.0363  1.4834  0.1380  -0.0173  0.1251
## IVshortPoverty      0.0546  0.0346  1.5788  0.1144  -0.0132  0.1224
## IVshortAssistance   0.1273  0.0377  3.3785  0.0007   0.0535  0.2012 ***
## IVshortSubjective   0.0241  0.0774  0.3116  0.7553  -0.1275  0.1757
## ExternalizingTRUE   0.0573  0.0249  2.3001  0.0214   0.0085  0.1062  *
##
## ---
## Signif. codes:  0 '***' 0.001 '**' 0.01 '*' 0.05 '.' 0.1 ' ' 1

```

```

rma.mv(yi=gcov,
      mods = ~IVshort + Externalizing,
      V=with(esdf,clubSandwich::impute_covariance_matrix(g.v,study.ID,.4)),

      random=~1 | study.ID/efid,
      slab=paste(study.ID, efid,sep=" "),
      data=esdf
    )

```

```

##
## Multivariate Meta-Analysis Model (k = 120; method: REML)
##
## Variance Components:
##
##      estim    sqrt  nlvls  fixed      factor
## sigma^2.1  0.0126  0.1121   16    no      study.ID
## sigma^2.2  0.0073  0.0854  120    no  study.ID/efid
##
## Test for Residual Heterogeneity:
## QE(df = 113) = 370.1072, p-val < .0001

```



```

##
## Test of Moderators (coefficient(s) 2:7):
## QM(df = 6) = 18.9328, p-val = 0.0043
##
## Model Results:
##
##           estimate      se    zval    pval    ci.lb    ci.ub
## intrcpt           0.1705  0.0439  3.8862  0.0001  0.0845  0.2565 ***
## IVshortHollingshead 0.0170  0.0647  0.2637  0.7920 -0.1097  0.1438
## IVshortParent Ed.   0.0509  0.0361  1.4083  0.1591 -0.0199  0.1217
## IVshortPoverty      0.0536  0.0344  1.5581  0.1192 -0.0138  0.1211
## IVshortAssistance   0.1278  0.0376  3.3965  0.0007  0.0541  0.2016 ***
## IVshortSubjective   0.0176  0.0799  0.2203  0.8257 -0.1390  0.1742
## ExternalizingTRUE   0.0575  0.0247  2.3313  0.0197  0.0092  0.1058  *
##
## ---
## Signif. codes:  0 '***' 0.001 '**' 0.01 '*' 0.05 '.' 0.1 ' ' 1

```

```

rma.mv(yi=gcor,
      mods = ~IVshort + Externalizing,
      V=with(esdf,clubSandwich::impute_covariance_matrix(g.v,study.ID,.5)),

      random=~1 | study.ID/efid,
      slab=paste(study.ID, efid,sep=" "),
      data=esdf
    )

```

```

##
## Multivariate Meta-Analysis Model (k = 120; method: REML)
##
## Variance Components:
##
##           estim    sqrt  nlvls  fixed      factor
## sigma^2.1  0.0122  0.1106    16     no      study.ID
## sigma^2.2  0.0078  0.0886   120     no  study.ID/efid
##
## Test for Residual Heterogeneity:
## QE(df = 113) = 423.9046, p-val < .0001
##
## Test of Moderators (coefficient(s) 2:7):

```

```

## QM(df = 6) = 19.4316, p-val = 0.0035
##
## Model Results:
##
##           estimate      se    zval    pval    ci.lb    ci.ub
## intrcpt           0.1724  0.0438  3.9342 <.0001  0.0865  0.2582 ***
## IVshortHollingshead 0.0169  0.0639  0.2637  0.7920 -0.1084  0.1422
## IVshortParent Ed.   0.0476  0.0360  1.3219  0.1862 -0.0230  0.1182
## IVshortPoverty      0.0526  0.0343  1.5324  0.1254 -0.0147  0.1199
## IVshortAssistance   0.1287  0.0376  3.4184  0.0006  0.0549  0.2024 ***
## IVshortSubjective   0.0116  0.0824  0.1414  0.8876 -0.1498  0.1731
## ExternalizingTRUE   0.0575  0.0244  2.3549  0.0185  0.0096  0.1054 *
##
## ---
## Signif. codes:  0 '***' 0.001 '**' 0.01 '*' 0.05 '.' 0.1 ' ' 1

```

```

rma.mv(yi=gcor,
      mods = ~IVshort + Externalizing,
      V=with(esdf,clubSandwich::impute_covariance_matrix(g.v,study.ID,.6)),

      random=~1 | study.ID/efid,
      slab=paste(study.ID, efid,sep=" "),
      data=esdf
    )

```

```

##
## Multivariate Meta-Analysis Model (k = 120; method: REML)
##
## Variance Components:
##
##           estim    sqrt  nlvls  fixed      factor
## sigma^2.1  0.0119  0.1091    16     no      study.ID
## sigma^2.2  0.0085  0.0924   120     no  study.ID/efid
##
## Test for Residual Heterogeneity:
## QE(df = 113) = 509.3432, p-val < .0001
##
## Test of Moderators (coefficient(s) 2:7):
## QM(df = 6) = 19.9280, p-val = 0.0029
##

```

```
## Model Results:
##
##           estimate      se    zval    pval    ci.lb    ci.ub
## intrcpt           0.1743  0.0438  3.9772 <.0001  0.0884  0.2602 ***
## IVshortHollingshead 0.0172  0.0633  0.2721  0.7855 -0.1069  0.1414
## IVshortParent Ed.   0.0438  0.0360  1.2160  0.2240 -0.0268  0.1144
## IVshortPoverty      0.0515  0.0344  1.4963  0.1346 -0.0160  0.1189
## IVshortAssistance   0.1298  0.0378  3.4386  0.0006  0.0558  0.2038 ***
## IVshortSubjective   0.0061  0.0849  0.0718  0.9428 -0.1603  0.1725
## ExternalizingTRUE   0.0574  0.0242  2.3664  0.0180  0.0099  0.1049 *
##
## ---
## Signif. codes:  0 '***' 0.001 '**' 0.01 '*' 0.05 '.' 0.1 ' ' 1
```

As imputed covariance raises, the effect estimates do not change very much.

### 14.2.2 Beta conversion

What changes if we do not include beta weights converted in to r values via Peterson and Brown's formula?

```
nonbetas<-esdf[is.na(esdf$beta),"efid"]
#Omnibus
rma.mv(yi=gcor,
       V=g.v,

       random=~1 | study.ID/efid,
       slab=paste(study.ID, efid,sep=" "),
       data=esdf[esdf$efid %in% nonbetas,]
       )
```

```
##
## Multivariate Meta-Analysis Model (k = 110; method: REML)
##
## Variance Components:
##
##           estim    sqrt  nlvls  fixed      factor
## sigma^2.1  0.0146  0.1208   15    no      study.ID
## sigma^2.2  0.0054  0.0734  110    no  study.ID/efid
##
## Test for Heterogeneity:
## Q(df = 109) = 413.0350, p-val < .0001
```

```
##
## Model Results:
##
## estimate      se      zval      pval      ci.lb      ci.ub
## 0.2614 0.0351 7.4481 <.0001 0.1926 0.3302 ***
##
## ---
## Signif. codes:  0 '***' 0.001 '**' 0.01 '*' 0.05 '.' 0.1 ' ' 1
```

```
rma.mv(yi=gcor,
       V=g.v,
       mods = ~ IVshort + Externalizing,

       random=~1 | study.ID/efid,
       slab=paste(study.ID, efid,sep=" "),
       data=esdf[esdf$efid %in% nonbetas,]
       )
```

```
##
## Multivariate Meta-Analysis Model (k = 110; method: REML)
##
## Variance Components:
##
##      estim      sqrt  nlvls  fixed      factor
## sigma^2.1 0.0123 0.1111    15    no      study.ID
## sigma^2.2 0.0029 0.0542   110    no  study.ID/efid
##
## Test for Residual Heterogeneity:
## QE(df = 103) = 258.5000, p-val < .0001
##
## Test of Moderators (coefficient(s) 2:7):
## QM(df = 6) = 28.6155, p-val < .0001
##
## Model Results:
##
##      estimate      se      zval      pval      ci.lb      ci.ub
## intrcpt          0.1599 0.0420 3.8080 0.0001 0.0776 0.2422 ***
## IVshortHollingshead 0.1116 0.0771 1.4476 0.1477 -0.0395 0.2627
## IVshortParent Ed.   0.0459 0.0362 1.2660 0.2055 -0.0251 0.1169
## IVshortPoverty      0.0712 0.0312 2.2829 0.0224 0.0101 0.1323 *
```

```

## IVshortAssistance      0.1831  0.0381  4.8076  <.0001  0.1084  0.2577  ***
## IVshortSubjective      0.0429  0.0567  0.7575  0.4488  -0.0682  0.1540
## ExternalizingTRUE      0.0444  0.0235  1.8915  0.0586  -0.0016  0.0904  .
##
## ---
## Signif. codes:  0 '***' 0.001 '**' 0.01 '*' 0.05 '.' 0.1 ' ' 1

```

```

rma.mv(yi=gcor,
       V=clubSandwich::impute_covariance_matrix(esdf[esdf$efid %in% nonbetas,]$g.v,esdf[esdf$efid %in% nonbetas,]$study.ID,corestlow),
       mods = ~ IVshort + Externalizing,

       random=~1 | study.ID/efid,
       slab=paste(study.ID, efid,sep=" "),
       data=esdf[esdf$efid %in% nonbetas,]
       )

```

```

##
## Multivariate Meta-Analysis Model (k = 110; method: REML)
##
## Variance Components:
##
##      estim      sqrt  nlvls  fixed      factor
## sigma^2.1  0.0114  0.1068    15     no      study.ID
## sigma^2.2  0.0034  0.0583   110     no  study.ID/efid
##
## Test for Residual Heterogeneity:
## QE(df = 103) = 206.0998, p-val < .0001
##
## Test of Moderators (coefficient(s) 2:7):
## QM(df = 6) = 28.0603, p-val < .0001
##
## Model Results:
##
##      estimate      se    zval    pval    ci.lb    ci.ub
## intrcpt          0.1623  0.0415  3.9084  <.0001  0.0809  0.2438  ***
## IVshortHollingshead  0.1078  0.0756  1.4270  0.1536  -0.0403  0.2559
## IVshortParent Ed.    0.0440  0.0362  1.2153  0.2243  -0.0270  0.1150
## IVshortPoverty       0.0690  0.0313  2.2059  0.0274  0.0077  0.1303  *
## IVshortAssistance    0.1800  0.0383  4.7019  <.0001  0.1049  0.2550  ***
## IVshortSubjective    0.0333  0.0616  0.5407  0.5887  -0.0874  0.1540

```

```
## ExternalizingTRUE      0.0458  0.0235  1.9518  0.0510  -0.0002  0.0918  .
##
## ---
## Signif. codes:  0 '***' 0.001 '**' 0.01 '*' 0.05 '.' 0.1 ' ' 1
```

Coefficients are substantially the same. Poverty becomes barely significant as a predictor and externalizing becomes marginal.

## 15 References

- Borenstein, M. (Ed.). (2009). *Introduction to meta-analysis*. Chichester, U.K: John Wiley & Sons.
- Gordon, M., & Lumley, T. (2017). *forestplot: Advanced Forest Plot Using “grid” Graphics*. Retrieved from <https://CRAN.R-project.org/package=forestplot>
- Green, S., & Higgins, J. (Eds.). (2011). *Cochrane handbook for systematic reviews of interventions*. Retrieved from [www.handbook.cochrane.org](http://www.handbook.cochrane.org)
- Harrell, Frank E. Jr, with contributions from Charles dUpont and many others. (2018). *Hmisc: Harrell Miscellaneous*. Retrieved from <https://CRAN.R-project.org/package=Hmisc>
- Lipsey, M. W., & Wilson, D. (2000). *Practical Meta-Analysis* (1 edition). Thousand Oaks, Calif: SAGE Publications, Inc.
- Lüdtke, D. (2018). *esc: Effect Size Computation for Meta Analysis*. Retrieved from <https://CRAN.R-project.org/package=esc>
- McLaughlin, K. A., Costello, E. J., Leblanc, W., Sampson, N. A., & Kessler, R. C. (2012). Socioeconomic Status and Adolescent Mental Disorders. *American Journal of Public Health, 102*(9), 1742–1750. <https://doi.org/10.2105/AJPH.2011.300477>
- Peterson, R. A., & Brown, S. P. (2005). On the Use of Beta Coefficients in Meta-Analysis. *Journal of Applied Psychology, 90*(1), 175–181. <https://doi.org/10.1037/0021-9010.90.1.175>
- Pustejovsky, J. (2019). *clubSandwich: Cluster-Robust (Sandwich) Variance Estimators with Small-Sample Corrections*. Retrieved from <https://CRAN.R-project.org/package=clubSandwich>
- Pustejovsky, J. E. (2014). Converting from d to r to z when the design uses extreme groups, dichotomization, or experimental control. *Psychological Methods, 19*(1), 92–112. <https://doi.org/10.1037/a0033788>
- R Core Team. (2018). *R: A Language and Environment for Statistical Computing*. Retrieved from <https://www.R-project.org/>
- Roth, P. L., Le, H., Oh, I.-S., Van Iddekinge, C. H., & Bobko, P. (2018). Using beta coefficients to impute missing correlations in meta-analysis research: Reasons for caution. *Journal of Applied Psychology, 103*(6), 644–658. <https://doi.org/10.1037/apl0000293>
- Van den Noortgate, W., López-López, J. A., Marín-Martínez, F., & Sánchez-Meca, J. (2013). Three-level meta-analysis of dependent effect sizes. *Behavior Research Methods, 45*(2), 576–594. <https://doi.org/10.3758/s13428-012-0261-6>
- Viechtbauer, W. (2010). Conducting meta-analyses in R with the metafor package. *Journal of Statistical Software, 36*(3), 1–48.
- Wei, Y., & Higgins, J. P. (2013). Estimating within-study covariances in multivariate meta-analysis with multiple outcomes. *Statistics in Medicine, 32*(7), 1191–1205. <https://doi.org/10.1002/sim.5679>

Wickham, H. (2016). *ggplot2: Elegant Graphics for Data Analysis*. Retrieved from <http://ggplot2.org>

Wickham, H., François, R., Henry, L., & Müller, K. (2019). *dplyr: A Grammar of Data Manipulation*. Retrieved from <https://CRAN.R-project.org/package=dplyr>

Xie, Y. (2018). *knitr: A General-Purpose Package for Dynamic Report Generation in R*. Retrieved from <https://yihui.name/knitr/>
